# Supplementary material for: Metal-/solvent-free oxidative [4 + 2]/[3 + 2] annulation of 2-ethynylbenzaldehydes with arylalkenes: facile synthesis of benzo[a]fluoren-5-ones
Source: Royal Society of Chemistry journal article supplement (doi:10.1039/d1qo01888d), 2022-01-01
Supplement: d1qo01888d1.pdf [file d1qo01888d1.pdf]

# Supplementary Information

## Metal-/solvent-free oxidative [4+2]/[3+2] annulation of 2-ethynylbenzaldehydes with arylalkenes: Facile synthesis of benzo[a]fluoren-5-ones

Cheng-Yong Wang,<sup>\*a</sup> Jiang-Xi Yu,<sup>a</sup> Bang Liu,<sup>a</sup> Fu-Xing Zhang,<sup>a</sup> Zhi-Qiang Wang,<sup>\*a</sup> Qin-Yu Hu,<sup>a</sup> Zhi-Feng Xu,<sup>\*a</sup> and Jin-Heng Li<sup>\*ab</sup>

---

<sup>a</sup> Key Laboratory of Functional Metal-Organic Compounds of Hunan Province, Key Laboratory of Functional Organometallic Materials, University of Hunan Province, College of Chemistry and Materials Science, Hengyang Normal University, Hengyang 421008, China. E-mail: [wang\\_cy26@163.com](mailto:wang_cy26@163.com), [zqwang2008@tom.com](mailto:zqwang2008@tom.com), [xuzhifeng@163.com](mailto:xuzhifeng@163.com), and [jhli@hnu.edu.cn](mailto:jhli@hnu.edu.cn)

<sup>b</sup> Key Laboratory of Jiangxi Province for Persistent Pollutants Control and Resources Recycle, Nanchang Hangkong University, Nanchang 330063, China.

### List of Contents

**(A) General Experimental Procedure**

**(B) Analytical data**

**(C) Spectra (NMR Spectra)**

**(D) The X-ray single-crystal diffraction analysis of 3aa (CCDC: 2122614)**

**(E) References**

## (A) General Experimental Procedure

All  $^1\text{H}$  and  $^{13}\text{C}$  NMR spectras were recorded on a 500 MHz spectrometer at room temperature in  $\text{CDCl}_3$  with tetramethylsilane as internal standard. Compounds **1**, **1a-D** were prepared according to reported literatures<sup>1</sup>, alkenes **2b-c**, **2e-k**, **2a-D<sub>5</sub>** were prepared from corresponding ketones as the reported methods<sup>2</sup>, and other materials were purchased from commercial sources and used as received.

### (a) Typical Experimental Procedure for the Synthesis of Benzo[*a*]fluoren-5-ones

(3):

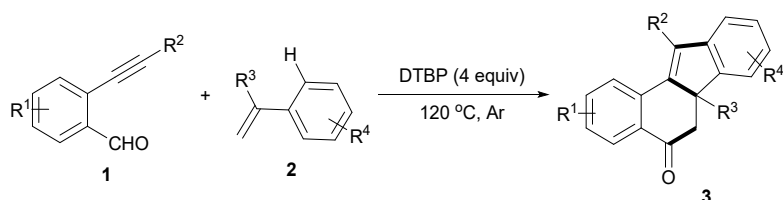

A oven-dried Schlenk tube equipped with a magnetic stirring bar was charged with aldehyde **1** (0.3 mmol), alkene **2** (0.9 mmol), DTBP (4 equiv; 1.2 mmol). The tube was evacuated and back-filled with argon for three times and the mixture was stirred at 120 °C (oil bath) for 24 h until complete consumption of **1** as monitored by TLC and/or GC-MS analysis. After the reaction was finished, the mixture was cool to room temperature and was concentrated to give the crude product. The resulting residue was purified by silica gel column chromatography (hexane/ethyl acetate) to afford the desired product **3**.

## (B) Analytical data

### 6a-Methyl-11-phenyl-6,6a-dihydro-5H-benzo[*a*]fluoren-5-one (3aa):<sup>3</sup>

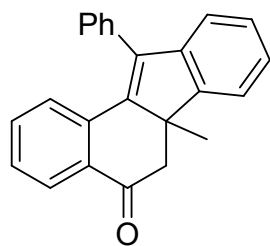

69% yield; White solid; <sup>1</sup>H NMR (500 MHz, CDCl<sub>3</sub>): δ 8.12-8.10 (m, 1H), 7.49-7.46 (m, 3H), 7.45-7.41 (m, 3H), 7.33-7.28 (m, 4H), 7.26-7.24 (m, 1H), 7.17-7.15 (m, 1H), 3.26 (d, *J* = 16.0 Hz, 1H), 2.51 (d, *J* = 16.0 Hz, 1H), 1.38 (s, 3H); <sup>13</sup>C NMR (125 MHz, CDCl<sub>3</sub>): δ 197.59, 151.94, 144.36, 142.92, 137.96, 135.74, 134.62, 133.24, 130.60, 129.06, 128.94, 127.95, 127.66, 127.58, 127.43, 127.35, 126.12, 121.58, 121.56, 52.43, 49.26, 23.16; LRMS (EI 70 ev) *m/z* (%): 322 (M<sup>+</sup>, 82), 307 (100), 277 (17).

### 6a-Methyl-11-(*p*-tolyl)-6,6a-dihydro-5H-benzo[*a*]fluoren-5-one (3ba):<sup>3</sup>

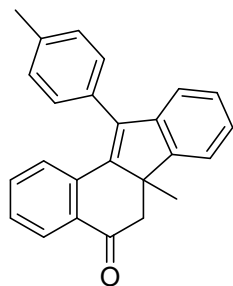

68% yield; Light yellow solid; <sup>1</sup>H NMR (500 MHz, CDCl<sub>3</sub>): δ 8.12-8.10 (m, 1H), 7.47-7.45 (m, 1H), 7.33-7.31 (m, 3H), 7.30-7.28 (m, 4H), 7.28-7.25 (m, 2H), 7.22-7.20 (m, 1H), 3.25 (d, *J* = 16.0 Hz, 1H), 2.51 (d, *J* = 16.0 Hz, 1H), 2.45 (s, 3H), 1.37 (s, 3H); <sup>13</sup>C NMR (125 MHz, CDCl<sub>3</sub>): δ 197.72, 152.02, 144.56, 142.70, 138.04, 137.71, 135.97, 133.25, 131.56, 130.63, 129.67, 128.96, 127.65, 127.59, 127.41, 127.34, 126.08, 121.65, 121.55, 52.39, 49.31, 23.19, 21.39; LRMS (EI 70 ev) *m/z* (%): 336 (M<sup>+</sup>, 87), 321 (100), 276 (21).

**11-(4-Fluorophenyl)-6a-methyl-6,6a-dihydro-5H-benzo[*a*]fluoren-5-one (3ca):<sup>3</sup>**

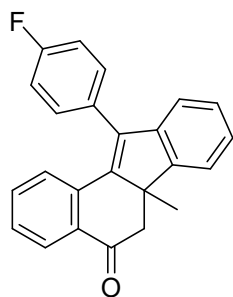

57% yield; Light yellow solid; <sup>1</sup>H NMR (500 MHz, CDCl<sub>3</sub>): δ 8.13-8.11 (m, 1H), 7.48-7.46 (m, 1H), 7.41-7.39 (m, 2H), 7.35-7.31 (m, 4H), 7.24-7.23 (m, 1H), 7.18 (t, *J* = 8.5 Hz, 2H), 7.15-7.13 (m, 1H), 3.26 (d, *J* = 16.0 Hz, 1H), 2.50 (d, *J* = 16.0 Hz, 1H), 1.37 (s, 3H); <sup>13</sup>C NMR (125 MHz, CDCl<sub>3</sub>): δ 197.39, 162.49(d, *J* = 245 Hz), 151.91, 144.18, 143.37, 136.85, 135.55, 133.30, 130.87(d, *J* = 7.5 Hz), 130.68, 130.50 (d, *J* = 3.75 Hz), 127.84, 127.50, 127.48, 127.44, 126.27, 121.65, 121.38, 116.09 (d, *J* = 21.25Hz), 52.46, 49.24, 23.10; <sup>19</sup>F NMR (471 MHz, CDCl<sub>3</sub>) δ -113.41; LRMS (EI 70 ev) *m/z* (%): 340 (M<sup>+</sup>, 79), 325 (100), 294 (18).

**11-(4-Chlorophenyl)-6a-methyl-6,6a-dihydro-5H-benzo[*a*]fluoren-5-one (3da):<sup>3</sup>**

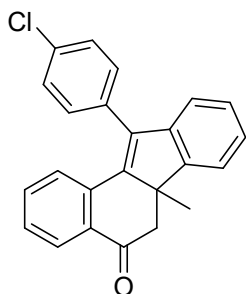

61% yield; Light yellow solid; <sup>1</sup>H NMR (500 MHz, CDCl<sub>3</sub>): δ 8.13-8.11 (m, 1H), 7.48-7.45 (m, 3H), 7.37-7.34 (m, 4H), 7.33-7.31 (m, 2H), 7.25-7.22 (m, 1H), 7.16-7.14 (m, 1H), 3.26 (d, *J* = 16.0 Hz, 1H), 2.49 (d, *J* = 16.0 Hz, 1H), 1.37 (s, 3H); <sup>13</sup>C NMR (125 MHz, CDCl<sub>3</sub>): δ 197.30, 151.90, 143.94, 143.54, 136.60, 135.41, 133.93, 133.36, 133.11, 130.67, 130.54, 129.30, 127.94, 127.52, 127.51, 127.46, 126.32, 121.68, 121.33, 52.55, 49.21, 23.10; LRMS (EI 70 ev) *m/z* (%): 358 (M<sup>+</sup>+2, 30), 356 (M<sup>+</sup>, 73), 343 (35), 341 (100), 276 (38).

#### 4-(6a-Methyl-5-oxo-6,6a-dihydro-5H-benzo[a]fluoren-11-yl)benzonitrile (3ea)

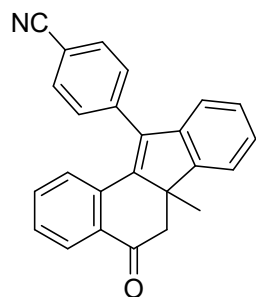

50% yield; Light yellow solid;  $^1\text{H}$  NMR (500 MHz,  $\text{CDCl}_3$ ):  $\delta$  8.15-8.13 (m, 1H), 7.80 (d,  $J = 8.5$  Hz, 2H), 7.57 (d,  $J = 7.5$  Hz, 2H), 7.50-7.49 (m, 1H), 7.40-7.32 (m, 4H), 7.21-7.19 (m, 1H), 7.05-7.03 (m, 1H), 3.28 (d,  $J = 16.5$  Hz, 1H), 2.51 (d,  $J = 16.5$

Hz, 1H), 1.39 (s, 3H);  $^{13}\text{C}$  NMR (125 MHz,  $\text{CDCl}_3$ ):  $\delta$  196.93, 151.84, 144.61, 143.22, 139.90, 135.82, 134.86, 133.45, 132.82, 130.76, 130.07, 128.37, 127.71, 127.65, 127.31, 126.61, 121.87, 121.07, 118.60, 111.91, 52.85, 49.17, 23.06; IR (KBr,  $\text{cm}^{-1}$ ): 1684; LRMS (EI 70 eV)  $m/z$  (%): 347 (84), 332 (100), 245 (23); HRMS  $m/z$  (ESI) calcd for  $\text{C}_{25}\text{H}_{18}\text{NO}$   $[\text{M}+\text{H}]^+$  348.1383, found 348.1379.

#### Methyl 4-(6a-methyl-5-oxo-6,6a-dihydro-5H-benzo[a]fluoren-11-yl)benzoate (3fa)

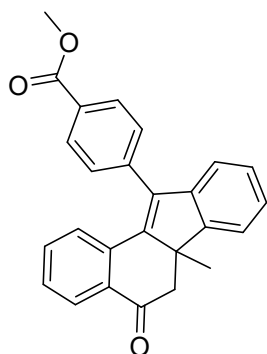

54% yield; Light yellow solid;  $^1\text{H}$  NMR (500 MHz,  $\text{CDCl}_3$ )  $\delta$  8.18 (d,  $J = 8.0$  Hz, 2H), 8.13 (d,  $J = 7.5$  Hz, 1H), 7.54-7.49 (m, 3H), 7.37-7.34 (m, 2H), 7.34-7.31 (m, 2H), 7.25-7.23 (m, 1H), 7.09 (d,  $J = 6.5$  Hz, 1H), 3.98 (s, 3H), 3.28 (d,  $J = 16.0$  Hz, 1H), 2.53 (d,  $J = 16.0$  Hz, 1H), 1.39 (s, 3H);  $^{13}\text{C}$  NMR (125 MHz,

$\text{CDCl}_3$ )  $\delta$  197.34, 166.80, 151.82, 143.81, 143.67, 139.64, 136.78, 135.21, 133.38, 130.58, 130.24, 129.65, 129.22, 128.03, 127.53, 127.49, 126.35, 121.71, 121.30, 52.65, 52.25, 49.14, 23.12; LRMS (EI 70 eV)  $m/z$  (%): 380 ( $\text{M}^+$ , 100), 365 (97), 276 (32), 138 (37); HRMS  $m/z$  (ESI) calcd for  $\text{C}_{26}\text{H}_{21}\text{O}_3$   $[\text{M}+\text{H}]^+$  381.1485, found 381.1487.

**6a-Methyl-11-(*m*-tolyl)-6,6a-dihydro-5*H*-benzo[*a*]fluoren-5-one (3ga):<sup>3</sup>**

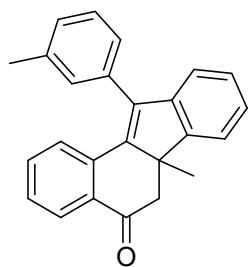

62% yield; White solid; <sup>1</sup>H NMR (500 MHz, CDCl<sub>3</sub>): δ 8.12-8.11

(m, 1H), 7.46-7.45 (m, 1H), 7.36 (t, *J* = 7.5 Hz, 1H), 7.30-7.29

(m, 4H), 7.26-7.23 (m, 3H), 7.21-7.19 (m, 2H), 3.26 (d, *J* = 15.5

Hz, 1H), 2.51 (d, *J* = 16.0 Hz, 1H), 2.39 (s, 3H), 1.37 (s, 3H); <sup>13</sup>C

NMR (125 MHz, CDCl<sub>3</sub>): δ 197.52, 151.93, 144.45, 142.70, 138.53, 135.80, 134.54,

133.16, 130.57, 129.53, 128.81, 128.67, 138.13, 127.59, 127.57, 127.37, 127.28,

126.08, 126.06, 121.62, 121.48, 52.34, 49.22, 23.17, 21.42; LRMS (EI 70 ev) *m/z* (%):

336 (M<sup>+</sup>, 100), 321 (97), 244 (33).

**6a-Methyl-11-(*o*-tolyl)-6,6a-dihydro-5*H*-benzo[*a*]fluoren-5-one (3ha):**

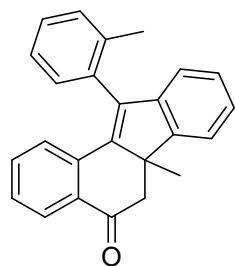

48% yield; Light yellow solid; <sup>1</sup>H NMR (500 MHz, CDCl<sub>3</sub>): δ 8.11-

8.09 (m, 1H), 7.49-7.45 (m, 2H), 7.42-7.35 (m, 2H), 7.33-7.26 (m,

5H), 7.08-7.06 (m, 2H), 3.29 (d, *J* = 16.0 Hz, 1H), 2.48 (d, *J* = 16.0

Hz, 1H), 1.84 (s, 3H), 1.42 (s, 3H); <sup>13</sup>C NMR (125 MHz, CDCl<sub>3</sub>):

δ 197.60, 152.09, 144.65, 143.39, 137.72, 136.37, 135.81, 133.97, 133.70, 130.81,

130.00, 129.79, 128.09, 127.71, 127.53, 127.33, 126.44, 126.18, 126.13, 121.67,

121.53, 52.53, 49.75, 23.31, 19.29; IR (KBr, cm<sup>-1</sup>): 1684; LRMS (EI 70 ev) *m/z* (%):

336 (M<sup>+</sup>, 100), 321 (99), 276 (21); HRMS *m/z* (ESI) calcd for C<sub>25</sub>H<sub>21</sub>O [M+H]<sup>+</sup>

337.1587, found 337.1583.

**6a-Methyl-11-(thiophen-2-yl)-6,6a-dihydro-5H-benzo[*a*]fluoren-5-one (3ia):**

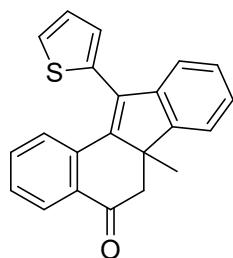

52% yield; Yellow solid;  $^1\text{H}$  NMR (500 MHz,  $\text{CDCl}_3$ ):  $\delta$  8.12 (d,  $J = 8.0$  Hz, 1H), 7.47-7.45 (m, 2H), 7.43-7.42 (m, 1H), 7.40-7.39 (m, 2H), 7.38-7.35 (m, 1H), 7.35-7.30 (m, 2H), 7.19-7.16 (m, 2H), 3.25 (d,  $J = 16.0$  Hz, 1H), 2.50 (d,  $J = 16.0$  Hz, 1H), 1.36 (s, 3H);  $^{13}\text{C}$  NMR (125 MHz,  $\text{CDCl}_3$ ):  $\delta$  197.33, 151.47, 145.60, 144.17, 135.36, 134.80, 133.31, 130.73, 130.66, 128.12, 127.64, 127.61, 127.58, 127.54, 127.36, 126.39, 126.35, 121.66, 121.55, 52.60, 49.21, 23.14; IR (KBr,  $\text{cm}^{-1}$ ): 1684; LRMS (EI 70 eV)  $m/z$  (%): 328 ( $\text{M}^+$ , 81), 313 (100), 244 (18); HRMS  $m/z$  (ESI) calcd for  $\text{C}_{22}\text{H}_{17}\text{OS}$  [ $\text{M}+\text{H}$ ] $^+$  329.0995, found 329.0994.

**11-Hexyl-6a-methyl-6,6a-dihydro-5H-benzo[*a*]fluoren-5-one (3ja):**

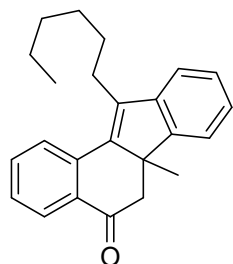

45% yield; Yellow liquid;  $^1\text{H}$  NMR (500 MHz,  $\text{CDCl}_3$ ):  $\delta$  8.15 (d,  $J = 8.0$  Hz, 1H), 7.66 (d,  $J = 3.5$  Hz, 2H), 7.49 (d,  $J = 7.5$  Hz, 1H), 7.43-7.39 (m, 2H), 7.37 (t,  $J = 7.5$  Hz, 1H), 7.30-7.28 (m, 1H), 3.16 (d,  $J = 16.0$  Hz, 1H), 2.90-2.81 (m, 2H), 2.30 (d,  $J = 15.5$  Hz, 1H), 1.88-1.66 (m, 2H), 1.55-1.49 (m, 2H), 1.40-1.32 (m, 4H), 1.28 (s, 3H), 0.90 (t,  $J = 7.0$  Hz, 3H);  $^{13}\text{C}$  NMR (125 MHz,  $\text{CDCl}_3$ ):  $\delta$  197.88, 152.40, 144.30, 141.62, 138.55, 136.83, 133.79, 130.30, 127.62, 127.31, 127.29, 127.02, 125.87, 121.49, 120.58, 52.41, 49.96, 31.66, 29.73, 29.25, 26.08, 22.62, 22.55, 14.05; IR (KBr,  $\text{cm}^{-1}$ ): 1686; LRMS (EI 70 eV)  $m/z$  (%): 330 ( $\text{M}^+$ , 44), 245 (100), 215 (23); HRMS  $m/z$  (ESI) calcd for  $\text{C}_{24}\text{H}_{27}\text{O}$  [ $\text{M}+\text{H}$ ] $^+$  331.2056, found 331.2057.

**11-(1-Hydroxyethyl)-6a-methyl-6,6a-dihydro-5H-benzo[a]fluoren-5-one (3ka):**

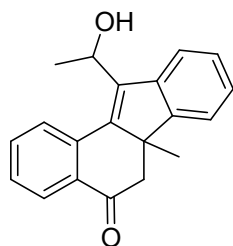

46% yield; Light yellow solid; *d.r.*=1.15:1; <sup>1</sup>H NMR (500 MHz, CDCl<sub>3</sub>) δ 8.11-8.08 (m, 2.15H), 8.00 (d, *J* = 7.5 Hz, 1.15H), 7.85-7.82 (m, 2H), 7.67-7.61 (m, 2.2H), 7.42-7.39 (m, 3H), 7.39-7.37 (m, 3.45H), 7.34 (d, *J* = 7.5 Hz, 1.85H), 7.31-7.29 (m, 1.6H), 5.58-5.54 (m, 1H), 5.51-5.47 (m, 1.15H), 3.15 (d, *J* = 7.0 Hz, 1H), 3.11 (d, *J* = 7.0 Hz, 1.15H), 2.47 (s, 2.15H), 2.26 (d, *J* = 7.5 Hz, 1.15H), 2.22 (d, *J* = 7.0 Hz, 1H), 1.85 (d, *J* = 6.5 Hz, 3.45H), 1.64 (d, *J* = 6.5 Hz, 3H), 1.24 (s, 3.45H), 1.22 (s, 3H). <sup>13</sup>C NMR (125 MHz, CDCl<sub>3</sub>) δ 197.71(2C), 152.46, 152.27, 142.86, 141.73, 141.40, 141.12, 140.41, 139.39, 135.99, 135.81, 133.85, 133.75, 130.53, 130.33, 128.09, 128.05, 127.98, 127.87, 127.65, 127.46, 127.19, 127.13, 125.94, 125.91, 123.89, 122.97, 121.74, 121.64, 65.21, 64.19, 52.90, 52.57, 49.87, 49.82, 22.57, 22.38(2C), 21.90; LRMS (EI 70 ev) *m/z* (%): 290 (M<sup>+</sup>, 27), 246 (57), 231 (100), 215 (26), 202 (51); HRMS *m/z* (ESI) calcd for C<sub>20</sub>H<sub>19</sub>O<sub>2</sub> [M+H]<sup>+</sup> 291.1380, found 291.1377.

**6a-Methyl-11-(trimethylsilyl)-6,6a-dihydro-5H-benzo[a]fluoren-5-one (3la):**

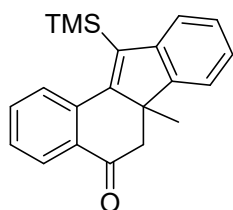

71% yield; Yellow solid; <sup>1</sup>H NMR (500 MHz, CDCl<sub>3</sub>): δ 8.01 (d, *J* = 7.5 Hz, 1H), 7.57 (d, *J* = 7.5 Hz, 1H), 7.53-7.48 (m, 2H), 7.39-7.36 (m, 1H), 7.31 (d, *J* = 7.0 Hz, 1H), 7.26-7.23 (m, 1H), 7.18-7.16 (m, 1H), 3.08 (d, *J* = 16.5 Hz, 1H), 2.23 (d, *J* = 17.0 Hz, 1H), 1.13 (s, 3H), 0.28 (s, 9H); <sup>13</sup>C NMR (125 MHz, CDCl<sub>3</sub>): δ 197.87, 159.52, 152.51, 147.47, 137.84, 136.60, 132.81, 130.72, 129.24, 128.55, 127.02, 126.94, 125.18, 123.97, 121.76, 55.62, 50.41, 22.22, 1.36; IR (KBr, cm<sup>-1</sup>): 1686; LRMS (EI 70 ev) *m/z* (%): 318 (M<sup>+</sup>, 55), 303



(48), 229 (19) ; HRMS  $m/z$  (ESI) calcd for  $C_{21}H_{23}OSi$   $[M+H]^+$  319.1513, found 319.1516.

**2,6a-Dimethyl-11-phenyl-6,6a-dihydro-5H-benzo[*a*]fluoren-5-one (3ma):<sup>3</sup>**

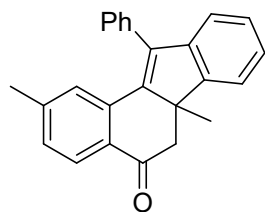

58% yield; Light yellow solid;  $^1H$  NMR (500 MHz,  $CDCl_3$ ):  $\delta$  8.01 (d,  $J = 8.0$  Hz, 1H), 7.49-7.41 (m, 6H), 7.31-7.26 (m, 3H), 7.13 (d,  $J = 8.0$  Hz, 1H), 6.94 (s, 1H), 3.23 (d,  $J = 16.0$  Hz, 1H),

2.49 (d,  $J = 16.0$  Hz, 1H), 2.15 (s, 3H), 1.37 (s, 3H);  $^{13}C$  NMR (125 MHz,  $CDCl_3$ ):  $\delta$  197.37, 152.04, 144.38, 143.96, 143.17, 137.75, 135.73, 134.68, 129.09, 128.83, 128.79, 128.45, 127.96, 127.93, 127.45, 127.39, 126.06, 121.56, 121.53, 52.50, 49.24, 23.23, 21.74; LRMS (EI 70 ev)  $m/z$  (%): 336 ( $M^+$ , 87), 321 (100), 276 (16).

**2-Fluoro-6a-methyl-11-phenyl-6,6a-dihydro-5H-benzo[*a*]fluoren-5-one (3na):**

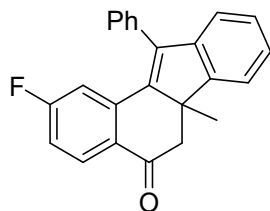

57% yield; White solid;  $^1H$  NMR (500 MHz,  $CDCl_3$ ):  $\delta$  8.15-8.12 (m, 1H), 7.52-7.49 (m, 2H), 7.48-7.45 (m, 2H), 7.41 (d,  $J = 6.5$  Hz, 2H), 7.35-7.30 (m, 2H), 7.28-7.24 (m, 1H), 7.01-6.97

(m, 1H), 6.81-6.78 (m, 1H), 3.25 (d,  $J = 16.0$  Hz, 1H), 2.49 (d,  $J = 16.0$  Hz, 1H), 1.38 (s, 3H);  $^{13}C$  NMR (125 MHz,  $CDCl_3$ ):  $\delta$  196.14, 166.51 (d,  $J = 253.75$  Hz), 151.93, 144.06, 141.84, 139.45, 138.38 (d,  $J = 9.0$  Hz), 133.97, 130.48 (d,  $J = 9.0$  Hz), 129.12, 128.89, 128.34, 127.56, 127.33 (d,  $J = 2.5$  Hz), 126.56, 121.90, 121.62, 115.33 (d,  $J = 22.5$  Hz), 113.67 (d,  $J = 22.5$  Hz), 52.49, 48.99, 23.19;  $^{19}F$  NMR (471 MHz,  $CDCl_3$ )  $\delta$  -103.51 (s); IR (KBr,  $cm^{-1}$ ): 1684; LRMS (EI 70 ev)  $m/z$  (%): 340 ( $M^+$ , 89), 325 (100), 294 (18), 263 (16); HRMS  $m/z$  (ESI) calcd for  $C_{24}H_{18}FO$   $[M+H]^+$  341.1336, found 341.1339.

**2-Chloro-6a-methyl-11-phenyl-6,6a-dihydro-5H-benzo[*a*]fluoren-5-one (30a):**<sup>3</sup>

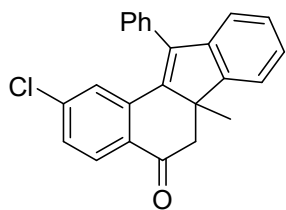

58% yield; Light yellow solid; <sup>1</sup>H NMR (500 MHz, CDCl<sub>3</sub>): δ 8.04 (d, *J* = 8.5 Hz, 1H), 7.53-7.46 (m, 4H), 7.41 (d, *J* = 6.5 Hz, 2H), 7.35-7.31 (m, 2H), 7.30-7.25 (m, 2H), 7.11 (d, *J* = 1.5

Hz, 1H), 3.25 (d, *J* = 16.0 Hz, 1H), 2.49 (d, *J* = 16.0 Hz, 1H), 1.37 (s, 3H); <sup>13</sup>C NMR (125 MHz, CDCl<sub>3</sub>): δ 196.52, 151.95, 144.01, 141.53, 139.69, 139.41, 137.18, 133.91, 129.11, 129.04, 128.94, 128.88, 128.38, 127.94, 127.59, 127.25, 126.57, 121.93, 121.63, 52.44, 49.09, 23.16; LRMS (EI 70 ev) *m/z* (%): 358 (M<sup>+</sup>+2, 33), 356 (M<sup>+</sup>, 90), 343 (33), 341 (100).

**3-Methoxy-6a-methyl-11-phenyl-6,6a-dihydro-5H-benzo[*a*]fluoren-5-one (3pa):**<sup>3</sup>

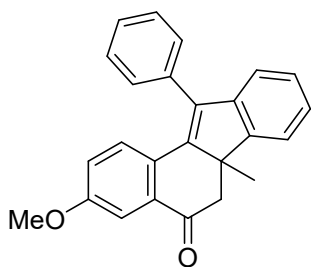

55% yield; Light yellow solid; <sup>1</sup>H NMR (500 MHz, CDCl<sub>3</sub>):

δ 7.59 (d, *J* = 2.5 Hz, 1H), 7.49-7.45 (m, 3H), 7.45-7.41 (m, 3H), 7.28 (t, *J* = 9.0 Hz, 2H), 7.24-7.23 (m, 1H), 7.10 (d, *J* = 8.5 Hz, 1H), 6.90-6.88 (m, 1H), 3.85 (s, 3H), 3.25 (d, *J* =

15.5 Hz, 1H), 2.50 (d, *J* = 16.0 Hz, 1H), 1.37 (s, 3H); <sup>13</sup>C NMR (125 MHz, CDCl<sub>3</sub>): δ 197.59, 159.14, 151.64, 144.61, 142.89, 136.18, 134.86, 131.90, 129.16, 129.07, 128.94, 128.91, 127.84, 127.38, 125.73, 121.62, 121.49, 121.23, 109.33, 55.44, 52.44, 49.18, 23.47; LRMS (EI 70 ev) *m/z* (%): 352 (M<sup>+</sup>, 100), 337 (100), 294 (11), 265 (15).

**3-Chloro-6a-methyl-11-phenyl-6,6a-dihydro-5H-benzo[*a*]fluoren-5-one (3qa):**<sup>3</sup>

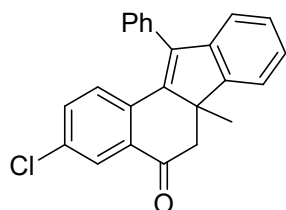

60% yield; Light yellow solid; <sup>1</sup>H NMR (500 MHz, CDCl<sub>3</sub>): δ

8.07 (d, *J* = 2.0 Hz, 1H), 7.51-7.43 (m, 4H), 7.43-7.40 (m, 2H), 7.34-7.30 (m, 2H), 7.27-7.24 (m, 2H), 7.09 (d, *J* = 8.5 Hz, 1H),

3.27 (d,  $J = 16.0$  Hz, 1H), 2.49 (d,  $J = 16.0$  Hz, 1H), 1.37 (s, 3H);  $^{13}\text{C}$  NMR (125 MHz,  $\text{CDCl}_3$ ):  $\delta$  196.39, 151.81, 144.16, 141.81, 138.67, 134.32, 134.09, 133.84, 133.28, 131.82, 129.08, 129.05, 128.97, 128.19, 127.58, 127.27, 126.40, 121.75, 121.62, 52.30, 49.11, 23.17; LRMS (EI 70 eV)  $m/z$  (%): 358 ( $\text{M}^{+}+2$ , 37), 356 ( $\text{M}^{+}$ , 99), 343 (33), 341 (100).

**6a-Methyl-11-phenyl-3-(trifluoromethyl)-6,6a-dihydro-5H-benzo[a]fluoren-5-one**

**(3ra):**

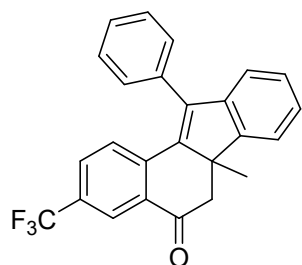

52% yield; Yellow solid;  $^1\text{H}$  NMR (500 MHz,  $\text{CDCl}_3$ ):  $\delta$  8.38 (s, 1H), 7.53-7.47 (m, 5H), 7.45-7.41 (m, 2H), 7.38-7.32 (m, 2H), 7.31-7.26 (m, 2H), 3.32 (d,  $J = 16.0$  Hz, 1H), 2.53 (d,  $J = 16.0$  Hz, 1H), 1.39 (s, 3H);  $^{13}\text{C}$  NMR (125 MHz,  $\text{CDCl}_3$ ):  $\delta$  196.30, 152.00, 143.96, 141.44, 140.51, 138.85, 134.04, 130.70, 129.65, 129.39 (q,  $J = 3.75$  Hz), 129.18, 128.90, 128.40, 128.18, 127.71, 126.86, 124.74 (q,  $J = 3.75$  Hz), 123.66 (q,  $J = 270$  Hz), 122.13, 121.71, 52.31, 49.12, 23.06;  $^{19}\text{F}$  NMR (471 MHz,  $\text{CDCl}_3$ ):  $\delta$  -62.9; IR (KBr,  $\text{cm}^{-1}$ ): 1692; LRMS (EI 70 eV)  $m/z$  (%): 390 ( $\text{M}^{+}$ , 84), 375 (100), 276 (22); HRMS  $m/z$  (ESI) calcd for  $\text{C}_{25}\text{H}_{18}\text{F}_3\text{O}$  [ $\text{M}+\text{H}$ ] $^{+}$  391.1304, found 391.1300.

**11-Phenyl-6a-propyl-6,6a-dihydro-5H-benzo[a]fluoren-5-one (3ab):**

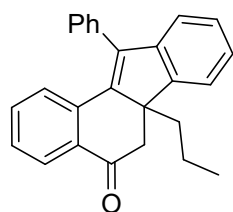

60% yield; Yellow solid;  $^1\text{H}$  NMR (500 MHz,  $\text{CDCl}_3$ ):  $\delta$  8.12-8.10 (m, 1H), 7.49-7.46 (m, 2H), 7.44-7.40 (m, 4H), 7.34-7.28 (m, 4H), 7.24-7.22 (m, 1H), 7.15-7.12 (m, 1H), 3.29 (d,  $J = 16.0$  Hz, 1H), 2.53 (d,  $J = 16.0$  Hz, 1H), 1.98-1.93 (m, 1H), 1.76-1.70 (m, 1H), 0.93-0.83 (m, 1H),

0.79-0.68 (m, 1H), 0.60 (t,  $J = 7.5$  Hz, 3H);  $^{13}\text{C}$  NMR (125 MHz,  $\text{CDCl}_3$ ):  $\delta$  197.76, 150.29, 145.57, 141.46, 139.18, 135.85, 134.71, 133.31, 130.69, 129.10, 128.93, 127.91, 127.67, 127.36 (2C), 127.31, 125.98, 121.60, 121.27, 56.13, 49.11, 38.91, 17.09, 14.08; IR (KBr,  $\text{cm}^{-1}$ ): 1684; LRMS (EI 70 ev)  $m/z$  (%): 350 ( $\text{M}^+$ , 53), 307 (100), 276 (23); HRMS  $m/z$  (ESI) calcd for  $\text{C}_{26}\text{H}_{23}\text{O}$  [ $\text{M}+\text{H}$ ] $^+$  351.1743, found 351.1743.

**6a,11-Diphenyl-6,6a-dihydro-5H-benzo[*a*]fluoren-5-one (3ac):**

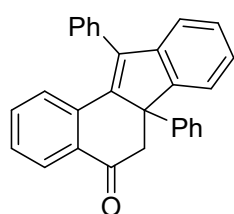

63% yield; Light yellow solid;  $^1\text{H}$  NMR (500 MHz,  $\text{CDCl}_3$ ):  $\delta$  7.96-7.94 (m, 1H), 7.53-7.50 (m, 4H), 7.49-7.46 (m, 1H), 7.29-7.26 (m, 3H), 7.26-7.24 (s, 2H), 7.24-7.22 (m, 1H), 7.21-7.18 (m, 2H), 7.16-7.13 (m, 3H), 7.08 (t,  $J = 7.5$  Hz, 1H), 4.07 (d,  $J = 16.5$  Hz, 1H), 2.77 (d,  $J = 16.5$  Hz, 1H);  $^{13}\text{C}$  NMR (125 MHz,  $\text{CDCl}_3$ ):  $\delta$  197.01, 152.48, 144.32, 143.03, 140.01, 139.70, 136.27, 134.31, 133.29, 130.74, 129.16, 129.05, 128.81, 128.21, 127.73, 127.56, 127.50, 127.36, 127.00, 126.70, 126.18, 122.90, 121.78, 60.17, 47.52; IR (KBr,  $\text{cm}^{-1}$ ): 1684; LRMS (EI 70 ev)  $m/z$  (%): 384 ( $\text{M}^+$ , 100), 306 (20), 276 (24); HRMS  $m/z$  (ESI) calcd for  $\text{C}_{29}\text{H}_{21}\text{O}$  [ $\text{M}+\text{H}$ ] $^+$  385.1587, found 385.1587.

**6a,9-Dimethyl-11-phenyl-6,6a-dihydro-5H-benzo[*a*]fluoren-5-one (3ae):<sup>3</sup>**

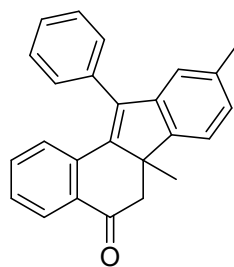

64% yield; Light yellow solid;  $^1\text{H}$  NMR (500 MHz,  $\text{CDCl}_3$ ):  $\delta$  8.11-8.10 (m, 1H), 7.51-7.45 (m, 3H), 7.43-7.41 (m, 2H), 7.36 (d,  $J = 7.5$  Hz, 1H), 7.31-7.29 (m, 2H), 7.13 (d,  $J = 7.5$  Hz, 2H), 7.05 (s, 1H), 3.24 (d,  $J = 16.0$  Hz, 1H), 2.50 (d,  $J = 16.0$  Hz, 1H), 2.36 (s, 3H), 1.37 (s, 3H);  $^{13}\text{C}$  NMR (125 MHz,  $\text{CDCl}_3$ ):  $\delta$  197.77, 149.38, 144.68, 143.32, 138.07, 137.37, 135.92, 134.87, 133.28, 130.70, 129.17, 129.02, 128.47, 127.99, 127.65, 127.41, 127.00, 122.24, 121.37, 52.17, 49.55, 23.33, 21.54; LRMS (EI 70 ev)

$m/z$  (%): 336 ( $M^+$ , 73), 321 (100), 276 (19).

**9-Chloro-6a-methyl-11-phenyl-6,6a-dihydro-5H-benzo[*a*]fluoren-5-one (3af):<sup>3</sup>**

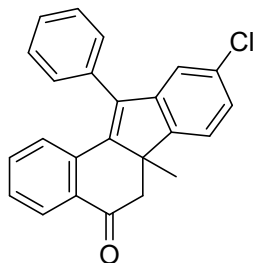

61% yield; White solid; <sup>1</sup>H NMR (500 MHz, CDCl<sub>3</sub>): δ 8.13-8.11 (m, 1H), 7.52-7.48 (m, 2H), 7.47-7.43 (m, 1H), 7.41-7.37 (m, 3H), 7.35-7.31 (m, 2H), 7.29-7.27 (m, 1H), 7.21 (d, *J* = 2.0 Hz, 1H), 7.16-7.14 (m, 1H), 3.24 (d, *J* = 16.0 Hz, 1H), 2.50 (d, *J* =

16.0 Hz, 1H), 1.37 (s, 3H); <sup>13</sup>C NMR (125 MHz, CDCl<sub>3</sub>): δ 197.07, 150.15, 146.16, 144.54, 137.03, 135.32, 133.97, 133.51, 133.39, 130.64, 129.15, 129.01, 128.29, 128.13, 127.66, 127.47, 126.02, 122.56, 121.74, 52.21, 49.10, 23.16; LRMS (EI 70 eV)

$m/z$  (%): 358 ( $M^+ + 2$ , 35), 356 ( $M^+$ , 97), 341 (100), 276 (42), 138 (34).

**9-Iodo-6a-methyl-11-phenyl-6,6a-dihydro-5H-benzo[*a*]fluoren-5-one (3ag):**

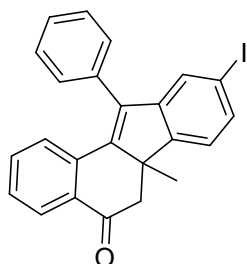

60% yield; Light yellow solid; <sup>1</sup>H NMR (500 MHz, CDCl<sub>3</sub>) δ 8.12-8.10 (m, 1H), 7.64-7.62 (m, 1H), 7.55 (s, 1H), 7.51-7.49 (m, 2H), 7.47-7.44 (m, 1H), 7.39-7.38 (m, 2H), 7.36-7.30 (m, 2H), 7.22 (d, *J* = 7.5 Hz, 1H), 7.14-7.13 (m, 1H), 3.23 (d, *J* = 16.0 Hz,

1H), 2.49 (d, *J* = 16.5 Hz, 1H), 1.36 (s, 3H); <sup>13</sup>C NMR (125 MHz, CDCl<sub>3</sub>) δ 196.95, 151.32, 146.62, 144.09, 136.81, 135.20, 134.82, 133.91, 133.35, 130.60, 130.49, 129.14, 128.97, 128.25, 128.09, 127.63, 127.44, 123.36, 92.91, 52.30, 48.92, 23.02;

LRMS (EI 70 eV)  $m/z$  (%): 448 ( $M^+$ , 88), 433 (53), 276 (65), 215 (28), 138 (83); HRMS

$m/z$  (ESI) calcd for C<sub>24</sub>H<sub>18</sub>IO [ $M+H$ ]<sup>+</sup> 449.0397, found 449.0402.

### 6a-Methyl-5-oxo-11-phenyl-6,6a-dihydro-5H-benzo[a]fluorene-9-carbonitrile

(3ah):

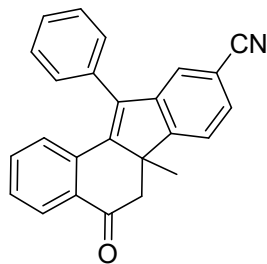

58% yield; Light yellow solid;  $^1\text{H}$  NMR (500 MHz,  $\text{CDCl}_3$ ):  $\delta$

8.14-8.12 (m, 1H), 7.62-7.60 (m, 1H), 7.56-7.51 (m, 3H), 7.51-

7.49 (m, 2H), 7.40-7.37 (m, 3H), 7.37-7.34 (m, 1H), 7.20-7.18

(m, 1H), 3.27 (d,  $J = 16.0$  Hz, 1H), 2.51 (d,  $J = 16.0$  Hz, 1H),

1.40 (s, 3H);  $^{13}\text{C}$  NMR (125 MHz,  $\text{CDCl}_3$ ):  $\delta$  196.33, 156.21, 145.35, 145.02, 136.39,

134.82, 133.55, 133.32, 130.63, 130.02, 129.32, 128.90, 128.60, 128.57, 127.72,

127.57, 124.99, 122.34, 119.09, 111.51, 52.94, 48.48, 22.90; LRMS (EI 70 eV)  $m/z$  (%):

347 ( $\text{M}^+$ , 91), 332 (100), 314 (18), 269 (32); HRMS  $m/z$  (ESI) calcd for  $\text{C}_{25}\text{H}_{18}\text{NO}$

$[\text{M}+\text{H}]^+$  348.1383, found 348.1390.

### 10-Methoxy-6a-methyl-11-phenyl-6,6a-dihydro-5H-benzo[a]fluorene-5-one (3ai)

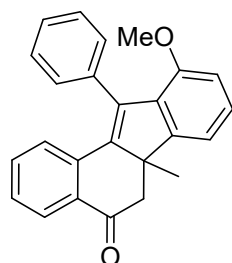

25% yield; Light yellow solid;  $^1\text{H}$  NMR (500 MHz,  $\text{CDCl}_3$ )  $\delta$  8.07

(d,  $J = 8.5$  Hz, 1H), 7.52-7.32 (m, 4H), 7.29-7.21 (m, 4H), 7.09 (d,

$J = 7.5$  Hz, 1H), 6.92 (d,  $J = 7.5$  Hz, 1H), 6.80 (d,  $J = 8.0$  Hz, 1H),

3.54 (s, 3H), 3.21 (d,  $J = 16.0$  Hz, 1H), 2.50 (d,  $J = 16.0$  Hz, 1H),

1.36 (s, 3H);  $^{13}\text{C}$  NMR (126 MHz,  $\text{CDCl}_3$ )  $\delta$  197.70, 155.59, 154.43, 142.35, 137.84,

137.06, 136.07, 133.14, 131.59, 130.55, 127.89(2C), 127.63, 127.59, 127.24, 127.21,

127.13, 114.42, 110.70, 55.46, 52.32, 49.38, 23.32; LRMS (EI 70 eV)  $m/z$  (%): 352 ( $\text{M}^+$ ,

77), 337 (84), 322 (15), 265 (15).

### 8-Methoxy-6a-methyl-11-phenyl-6,6a-dihydro-5H-benzo[a]fluorene-5-one (3ai')

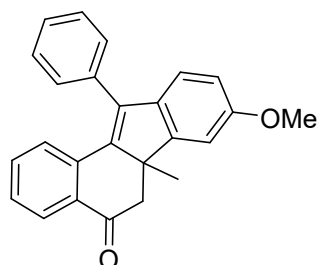

43% yield; Yellow solid;  $^1\text{H}$  NMR (500 MHz,  $\text{CDCl}_3$ )  $\delta$  8.10-8.08 (m, 1H), 7.49-7.46 (m, 2H), 7.42 (t,  $J = 8.5$  Hz, 3H), 7.29-7.28 (m, 2H), 7.16 (d,  $J = 8.5$  Hz, 1H), 7.14-7.12 (m, 1H), 7.03 (d,  $J = 2.0$  Hz, 1H), 6.85-6.83 (m, 1H), 3.87 (s, 3H), 3.21 (d,  $J = 16.0$  Hz, 1H), 2.53 (d,  $J = 16.0$  Hz, 1H), 1.37 (s, 3H).  $^{13}\text{C}$  NMR (125 MHz,  $\text{CDCl}_3$ )  $\delta$  197.6, 159.0, 153.9, 141.0, 137.8, 137.5, 136.1, 134.9, 133.2, 130.4, 129.0, 128.9, 127.9, 127.4, 127.3, 127.2, 122.3, 112.6, 108.2, 55.6, 52.2, 49.4, 23.4; LRMS (EI 70 ev)  $m/z$  (%): 352 ( $\text{M}^+$ , 79), 337 (100), 265 (27); HRMS  $m/z$  (ESI) calcd for  $\text{C}_{25}\text{H}_{21}\text{O}_2$  [ $\text{M}+\text{H}$ ] $^+$  353.1536, found 353.1534.

**7-Fluoro-6a-methyl-11-phenyl-6,6a-dihydro-5H-benzo[*a*]fluoren-5-one (3aj):**

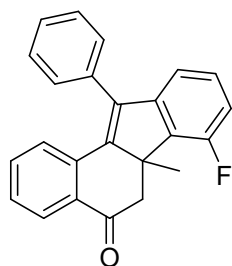

41% yield; Yellow solid;  $^1\text{H}$  NMR (500 MHz,  $\text{CDCl}_3$ ):  $\delta$  8.13-8.11 (m, 1H), 7.49-7.44 (m, 3H), 7.43-7.38 (m, 2H), 7.35-7.29 (m, 2H), 7.28-7.24 (m, 1H), 7.15-7.13 (m, 1H), 7.03 (d,  $J = 7.5$  Hz, 1H), 6.95 (t,  $J = 8.5$  Hz, 1H), 3.53 (d,  $J = 16.0$  Hz, 1H), 2.59 (d,  $J = 16.5$  Hz, 1H), 1.49 (s, 3H);  $^{13}\text{C}$  NMR (125 MHz,  $\text{CDCl}_3$ ):  $\delta$  197.09, 158.86 (d,  $J = 246.25$  Hz), 147.31 (d,  $J = 6.8$  Hz), 143.99, 137.38 (d,  $J = 2.5$  Hz), 136.40 (d,  $J = 16.5$  Hz), 135.10, 134.27, 133.29, 131.65, 130.70, 129.29 (d,  $J = 6.25$  Hz), 129.03, 128.49, 128.11 (d,  $J = 12.5$  Hz), 127.67, 127.41, 117.47 (d,  $J = 2.5$  Hz), 113.27 (d,  $J = 21.25$  Hz), 52.29 (d,  $J = 1.25$  Hz), 47.73, 21.46;  $^{19}\text{F}$  NMR (471 MHz,  $\text{CDCl}_3$ ):  $\delta$  -122.19; IR (KBr,  $\text{cm}^{-1}$ ): 1686; LRMS (EI 70 ev)  $m/z$  (%): 340 ( $\text{M}^+$ , 100), 325 (91), 294 (21), 262 (28); HRMS  $m/z$  (ESI) calcd for  $\text{C}_{24}\text{H}_{18}\text{FO}$  [ $\text{M}+\text{H}$ ] $^+$  341.1336, found 341.1337.

**6a-Methyl-10-phenyl-6,6a-dihydro-5H-benzo[4,5]indeno[1,2-*b*]thiophen-5-one**

**(3ak):**

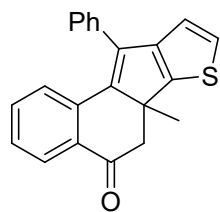

44% yield; Yellow solid;  $^1\text{H}$  NMR (500 MHz,  $\text{CDCl}_3$ ):  $\delta$  8.11-8.09 (m, 1H), 7.52-7.50 (m, 2H), 7.46-7.43 (m, 2H), 7.42-7.39 (m, 1H), 7.34-7.33 (m, 1H), 7.33-7.29 (m, 2H), 7.24-7.22 (m, 1H), 6.97 (d,  $J = 5.0$  Hz, 1H), 3.21 (d,  $J = 16.0$  Hz, 1H), 2.62 (d,  $J = 16.5$  Hz, 1H), 1.40 (s, 3H);  $^{13}\text{C}$  NMR (125 MHz,  $\text{CDCl}_3$ ):  $\delta$  197.26, 153.34, 148.86, 144.44, 136.23, 135.22, 135.27, 133.31, 130.08, 128.87, 128.55, 128.09, 127.85, 127.46, 127.24, 126.90, 119.64, 51.98, 50.08, 24.22; IR (KBr,  $\text{cm}^{-1}$ ): 1682; LRMS (EI 70 eV)  $m/z$  (%): 328 ( $\text{M}^+$ , 88), 313 (100), 252 (36), 207 (52); HRMS  $m/z$  (ESI) calcd for  $\text{C}_{22}\text{H}_{17}\text{OS}$   $[\text{M}+\text{H}]^+$  329.0995, found 329.0994.

**1a-D** (>99%D): <sup>1d</sup>

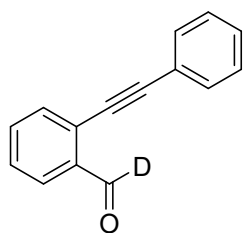

$^1\text{H}$  NMR (500 MHz,  $\text{CDCl}_3$ )  $\delta$  7.93 (d,  $J = 8$  Hz, 1H), 7.61 (d,  $J = 8$  Hz, 1H), 7.55-7.52 (m, 3H), 7.40 (t,  $J = 7.5$  Hz, 1H), 7.36-7.35 (m, 3H);  $^{13}\text{C}$  NMR (125 MHz,  $\text{CDCl}_3$ )  $\delta$  191.14 (t,  $J_{\text{C-D}} = 27.5$  Hz), 135.51, 133.65, 133.02, 131.52, 128.92, 128.45, 128.37, 127.04, 126.67, 122.11, 96.15, 84.75.

**2a-D<sub>5</sub>** (>98%D):<sup>4</sup>

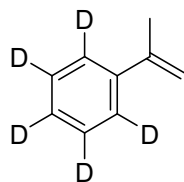

$^1\text{H}$  NMR (500 MHz,  $\text{CDCl}_3$ )  $\delta$  7.46 (s, 0.02H), 7.31 (s, 0.02H), 7.16 (s, 0.02H), 5.37 (s, 1H), 5.07 (s, 1H), 2.14 (s, 3H);  $^{13}\text{C}$  NMR (125 MHz,  $\text{CDCl}_3$ )  $\delta$  143.12, 140.93, 127.67 (t,  $J_{\text{C-D}} = 25$  Hz), 126.85 (t,  $J_{\text{C-D}} = 23.75$  Hz), 125.01 (t,  $J_{\text{C-D}} = 25$  Hz), 112, 21.8.

**1a** and **1a-D<sub>1</sub>**



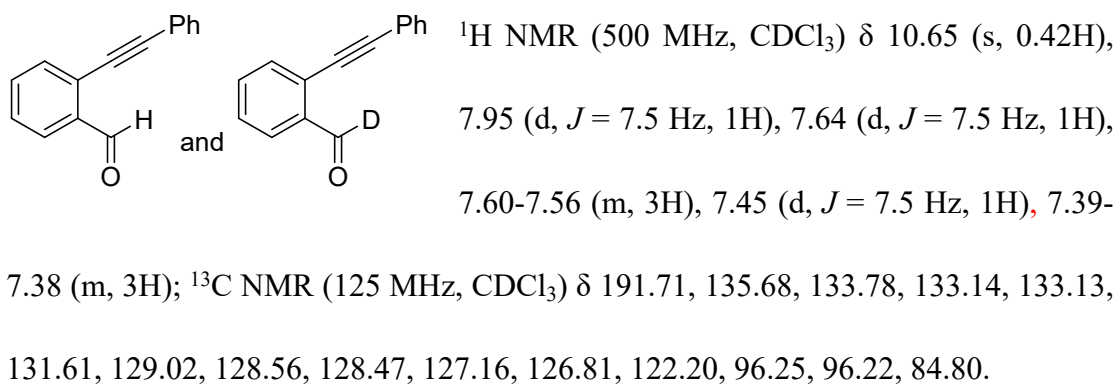

### 3aa and 3aa-D<sub>4</sub> (3h)

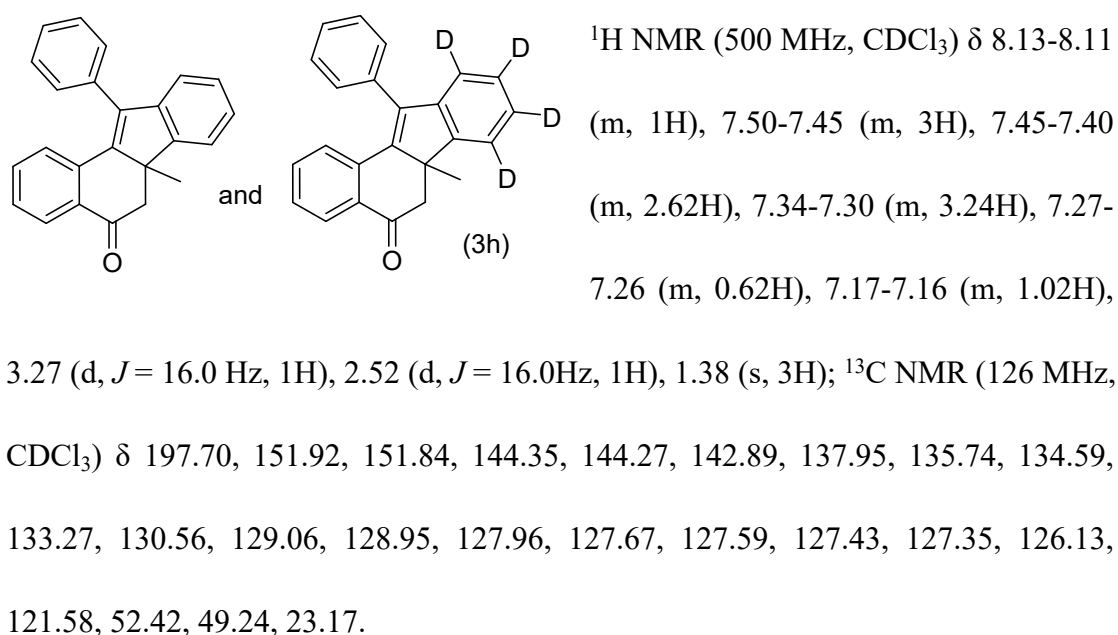

### 3aa and 3aa-D<sub>4</sub> (24h)

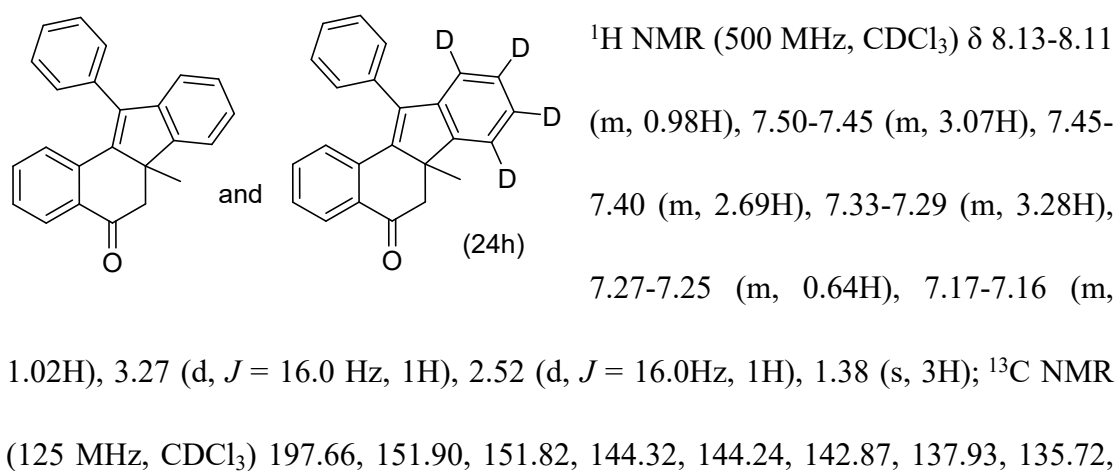

134.57, 133.25, 130.54, 129.04, 128.93, 127.94, 127.66, 127.57, 127.42, 127.34,  
126.11, 121.56, 52.40, 49.22, 23.15.

## (C) Spectra (NMR Spectra)

### 6a-Methyl-11-phenyl-6,6a-dihydro-5H-benzo[*a*]fluoren-5-one (3aa)

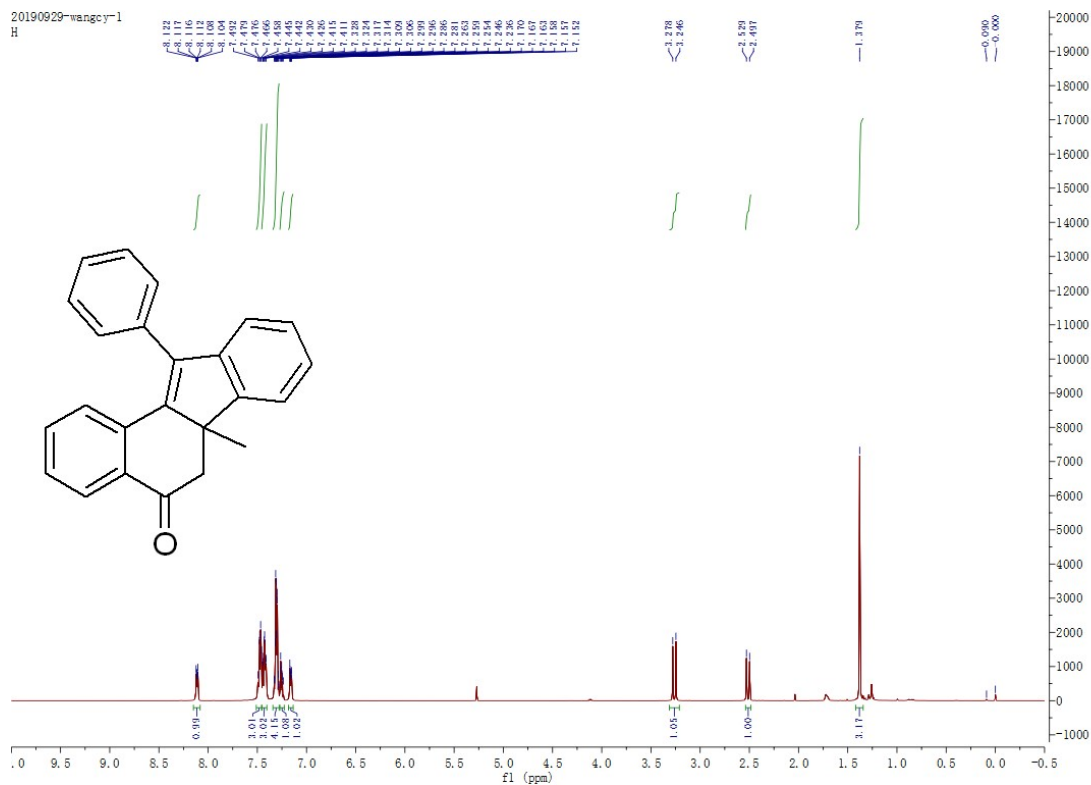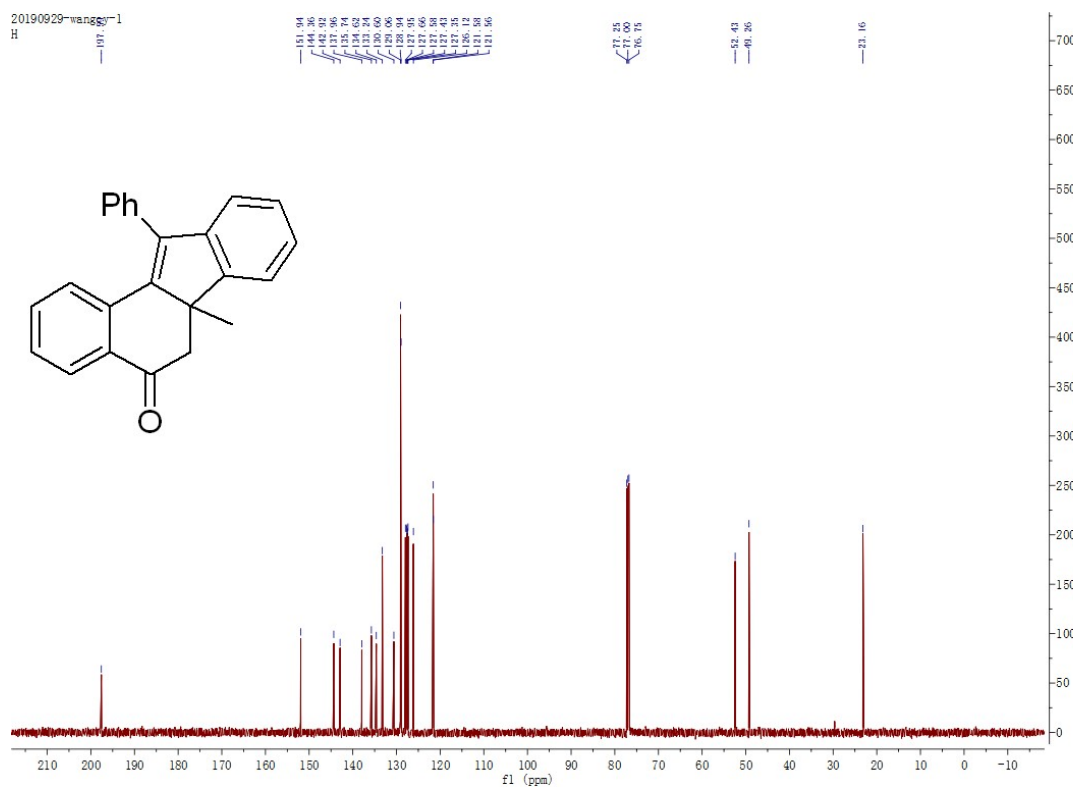

# 6a-Methyl-11-(*p*-tolyl)-6,6a-dihydro-5*H*-benzo[*a*]fluoren-5-one (3ba)

20191218-WangCY-5

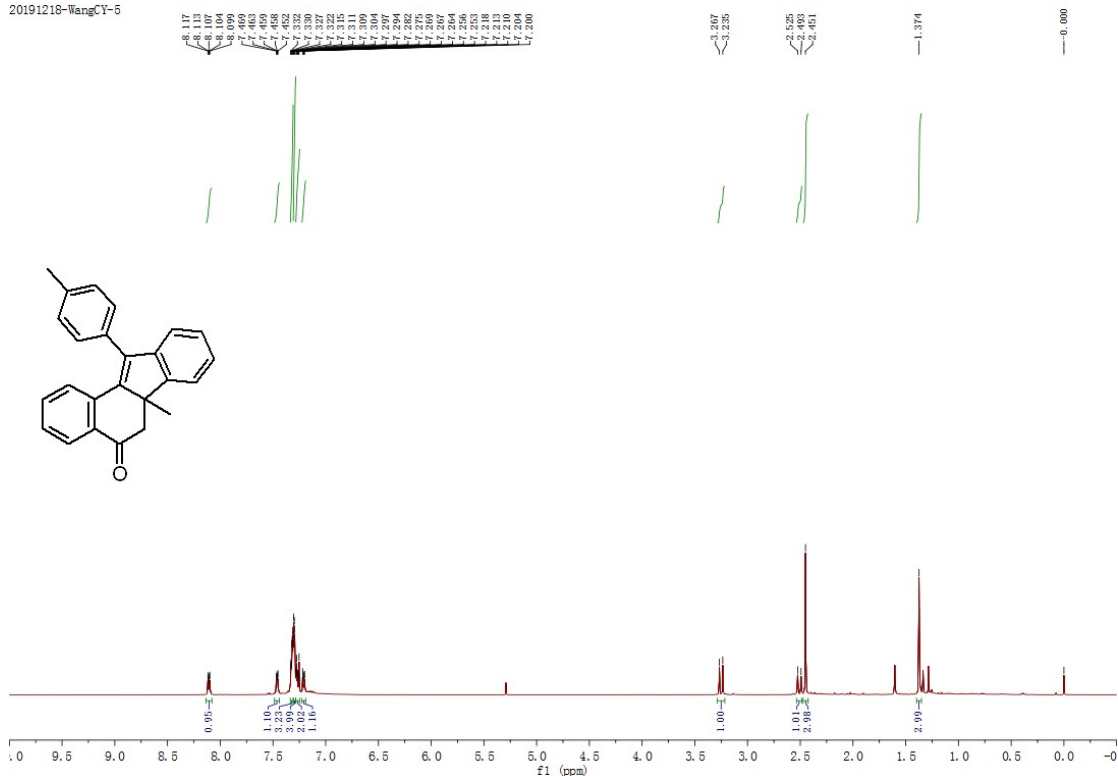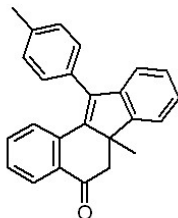

20191218-WangCY-5

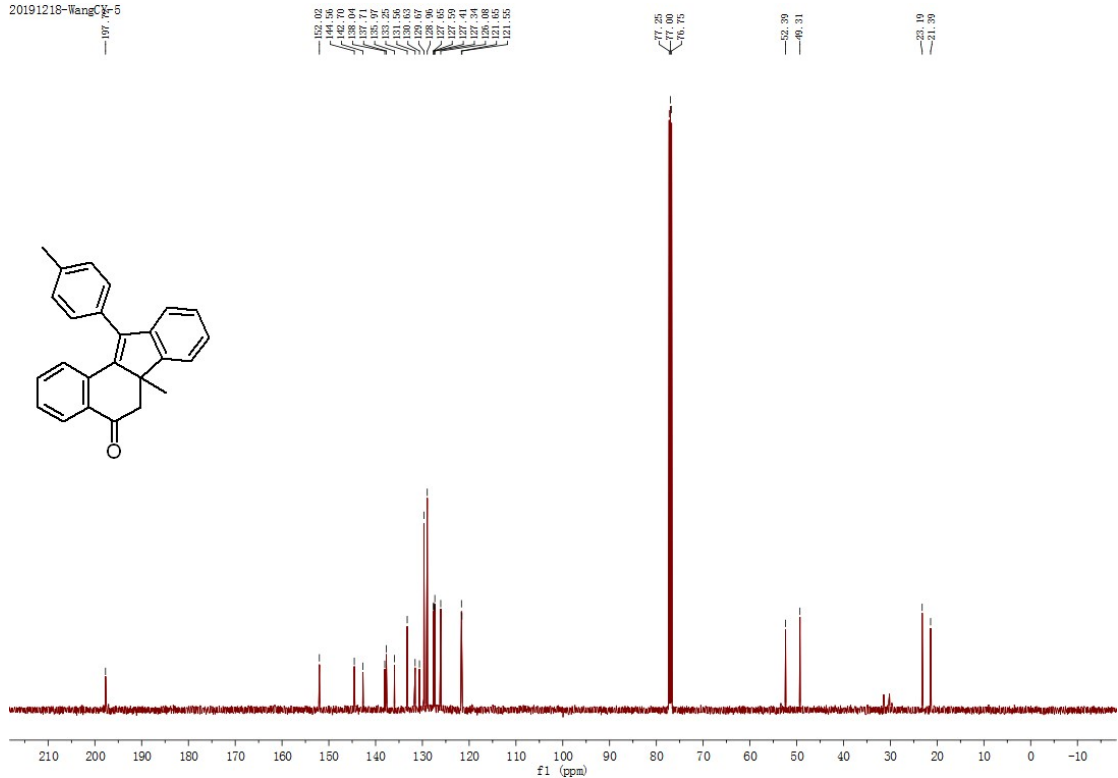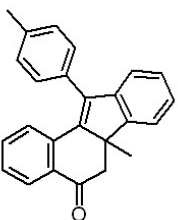

# 11-(4-Fluorophenyl)-6a-methyl-6,6a-dihydro-5H-benzo[a]fluoren-5-one (3ca)

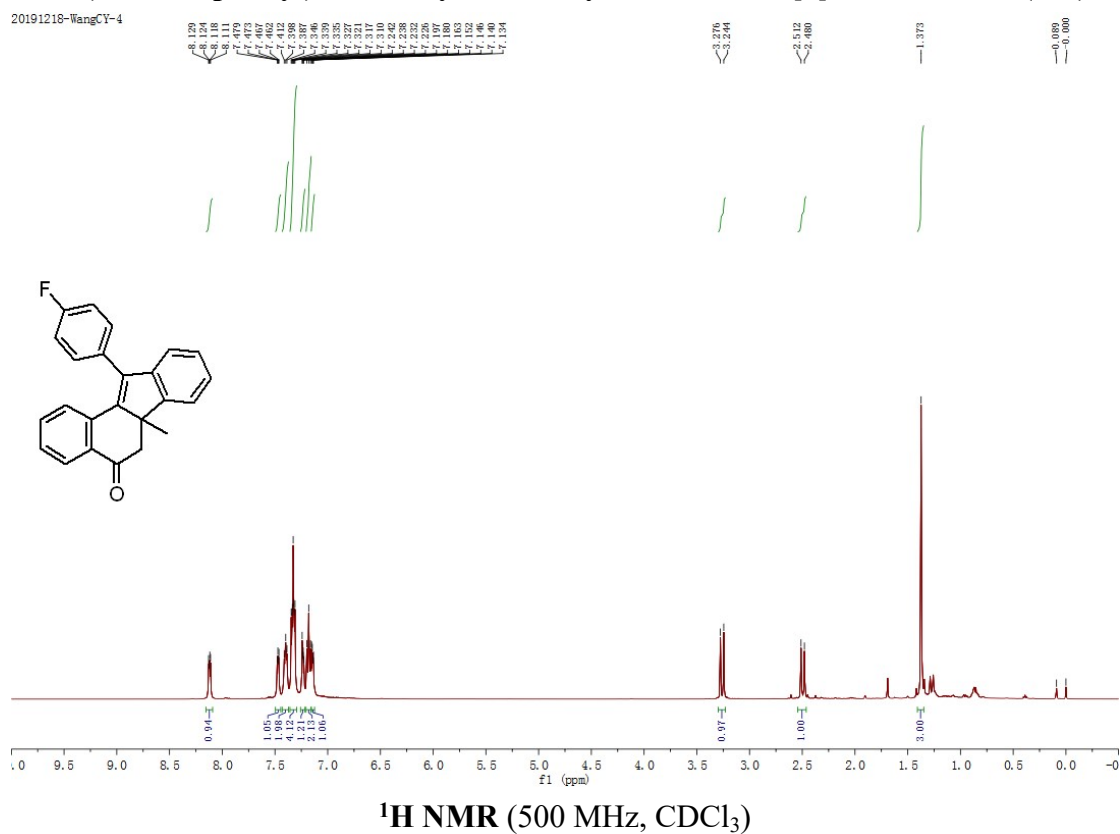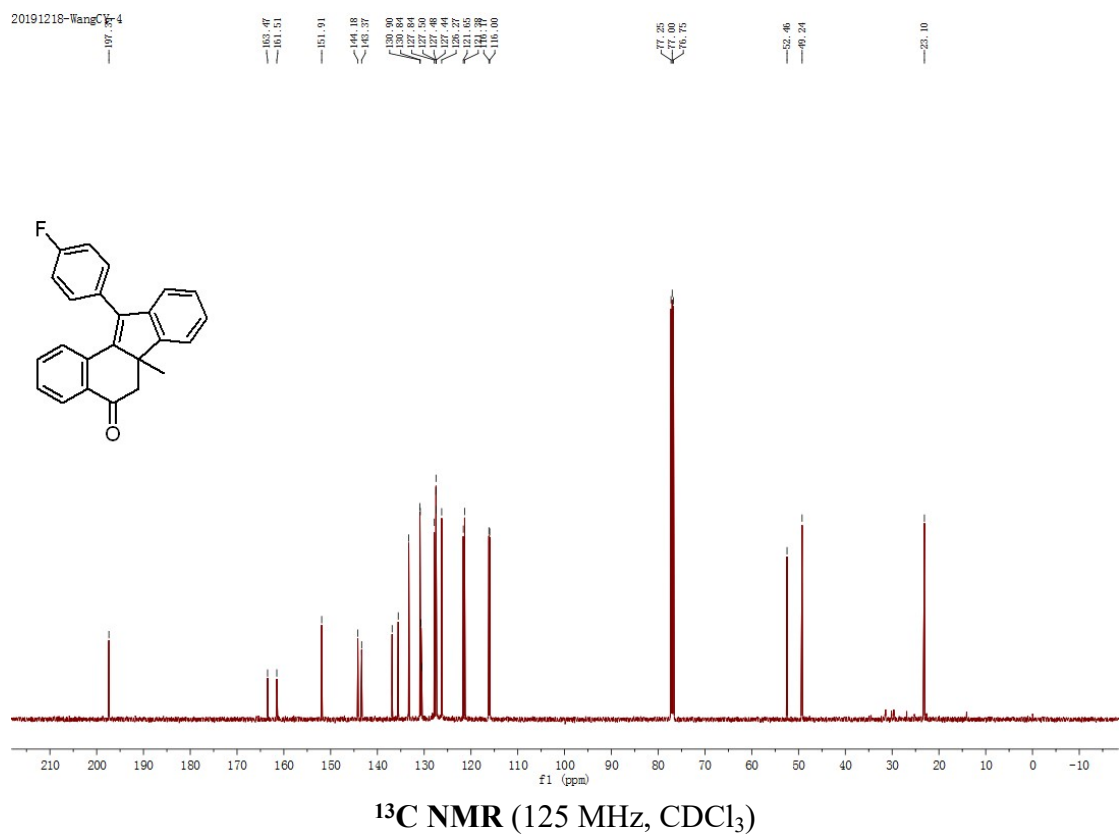

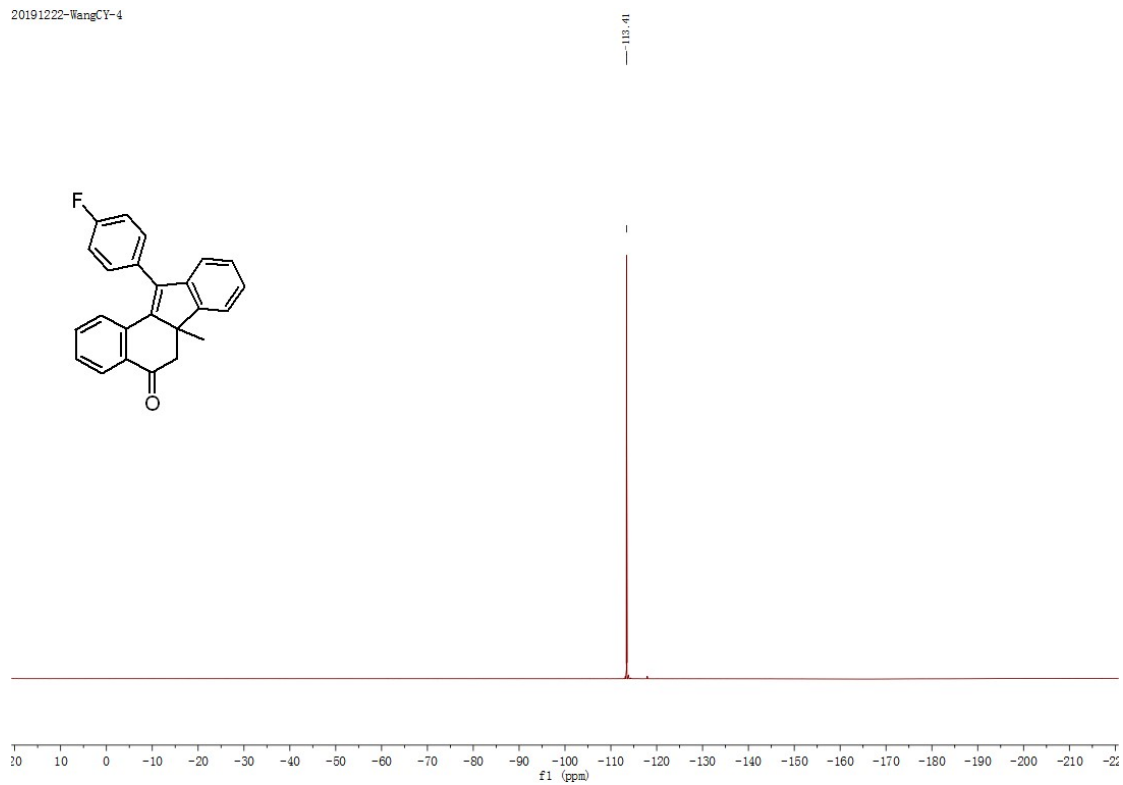

$^{19}\text{F}$  NMR (471 MHz,  $\text{CDCl}_3$ )

# 11-(4-Chlorophenyl)-6a-methyl-6,6a-dihydro-5H-benzo[*a*]fluoren-5-one (3da)

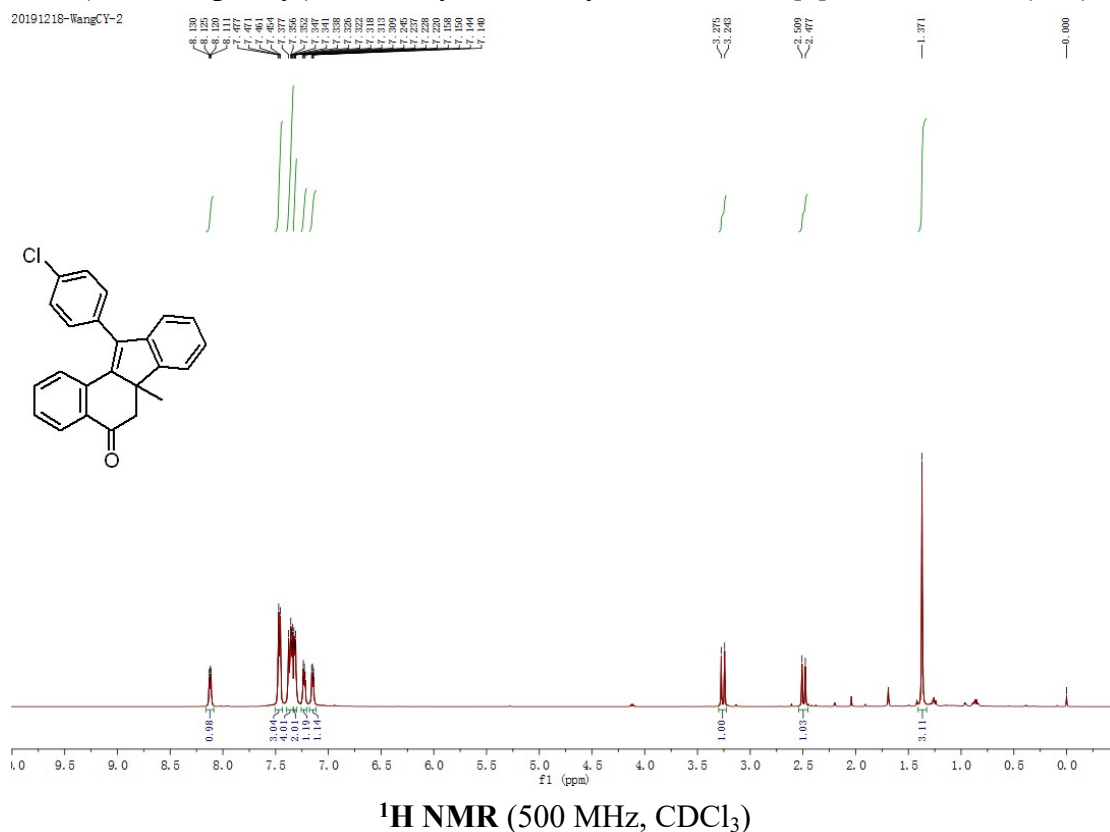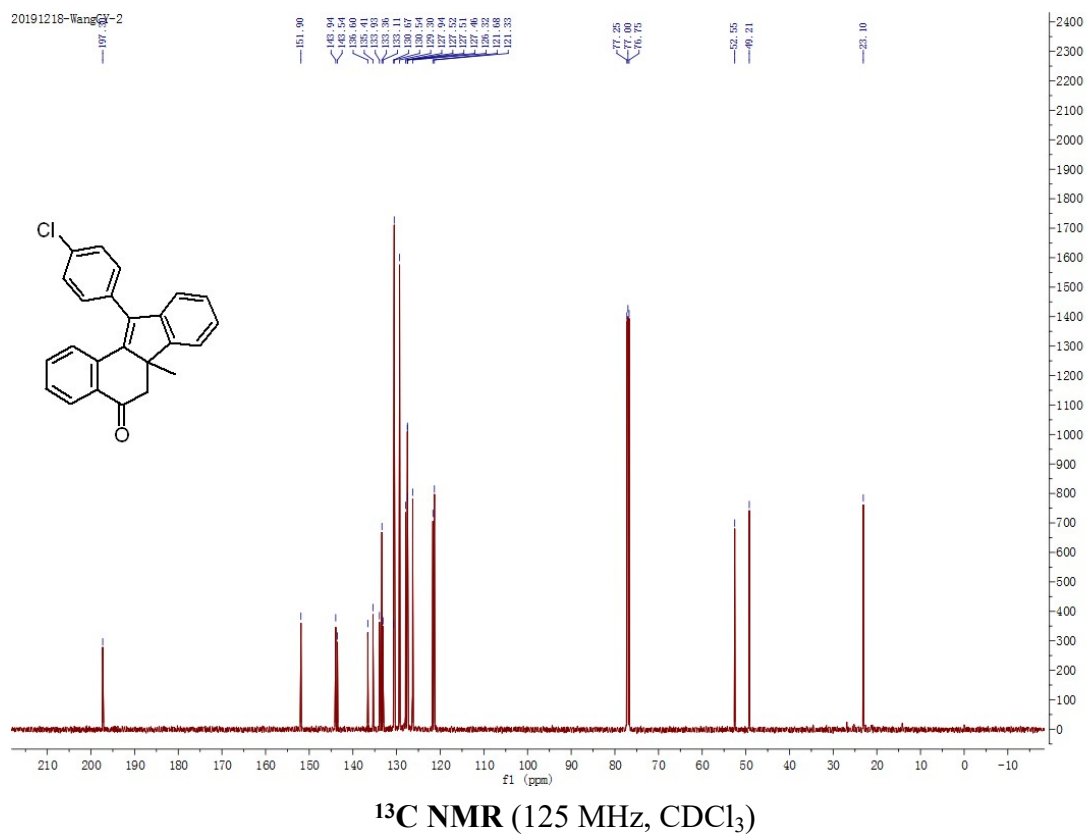

# 4-(6a-Methyl-5-oxo-6,6a-dihydro-5H-benzo[a]fluoren-11-yl)benzonitrile (3ea)

20191218-WangCY-3

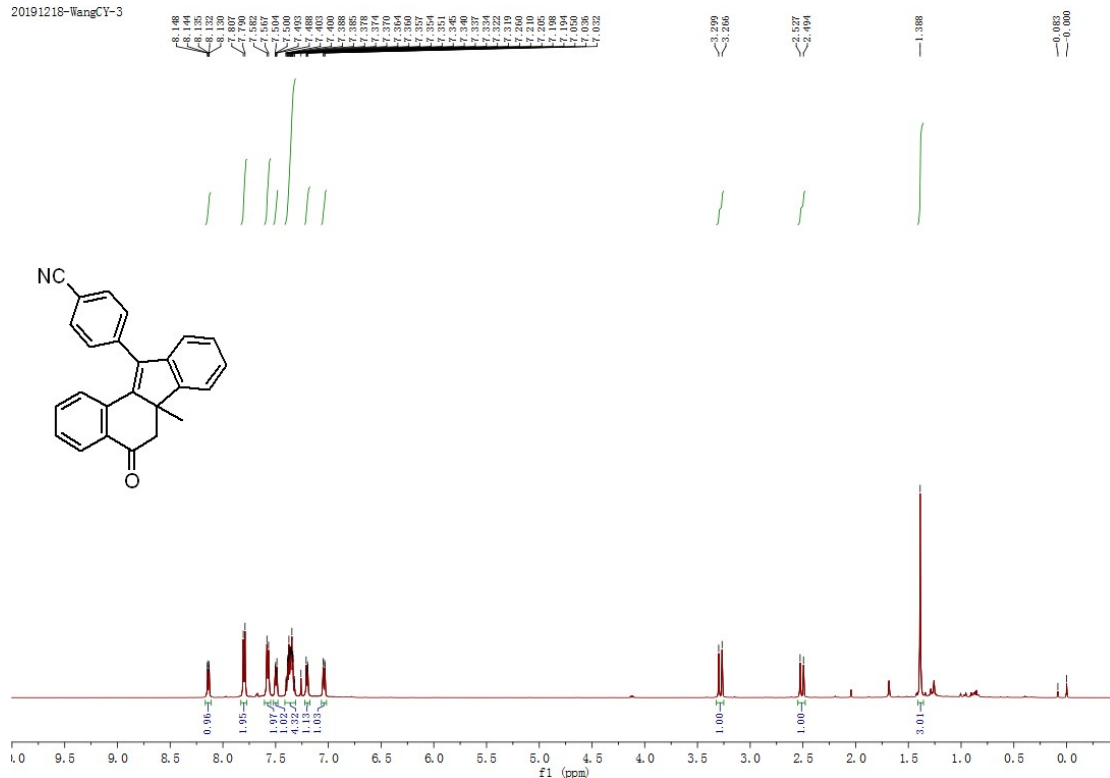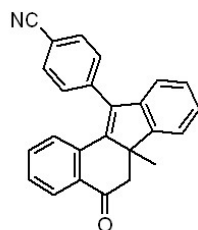

20191218-WangCY-3

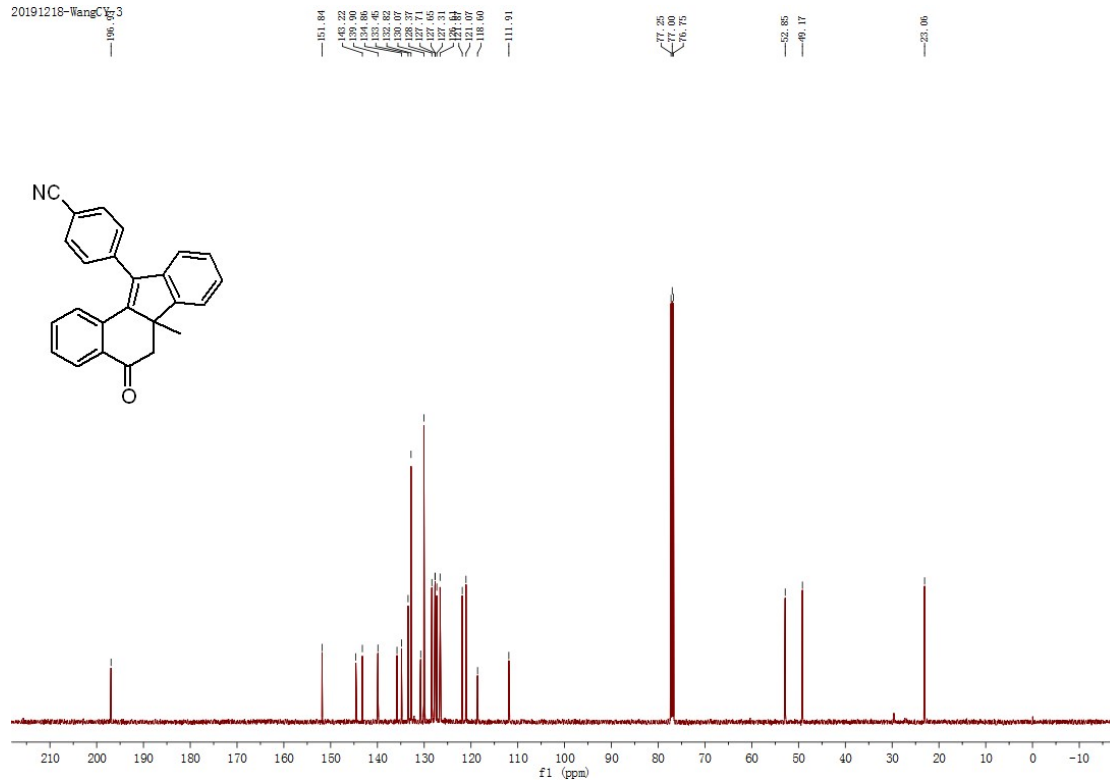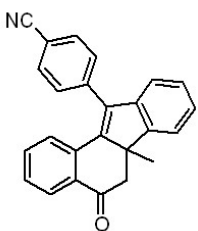



# Methyl 4-(6a-methyl-5-oxo-6,6a-dihydro-5H-benzo[a]fluoren-11-yl)benzoate (3fa)

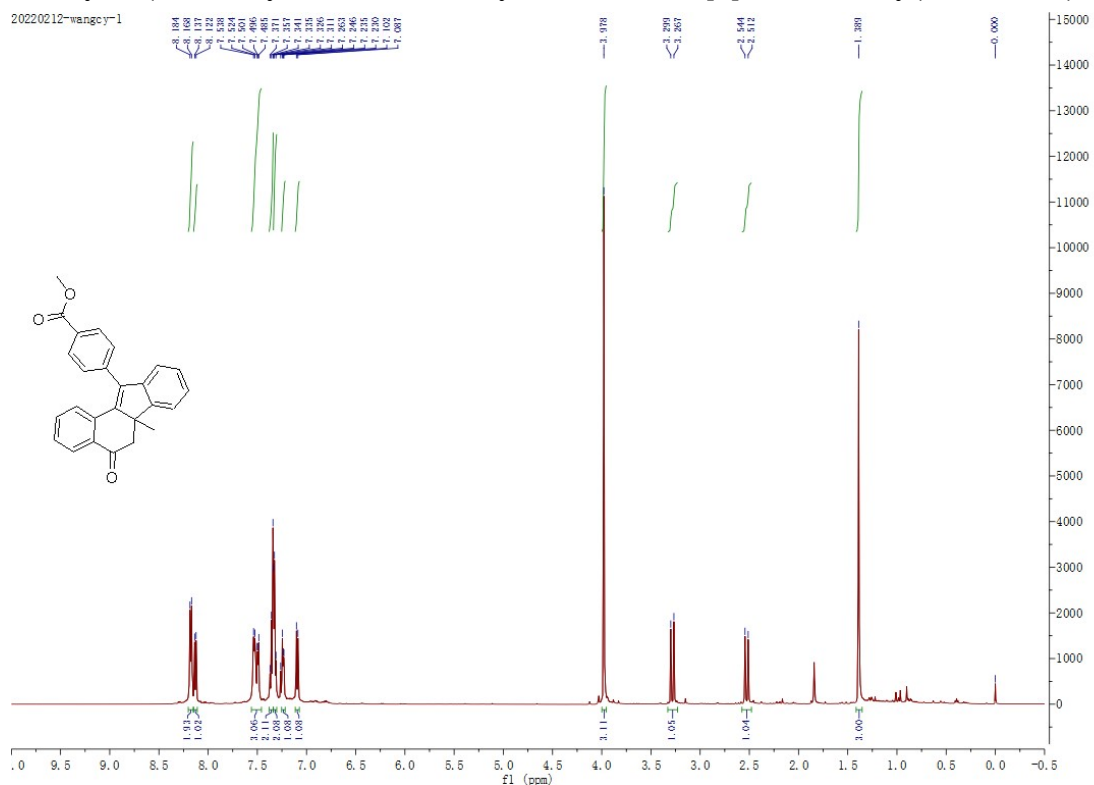

$^1\text{H}$  NMR (500 MHz,  $\text{CDCl}_3$ )

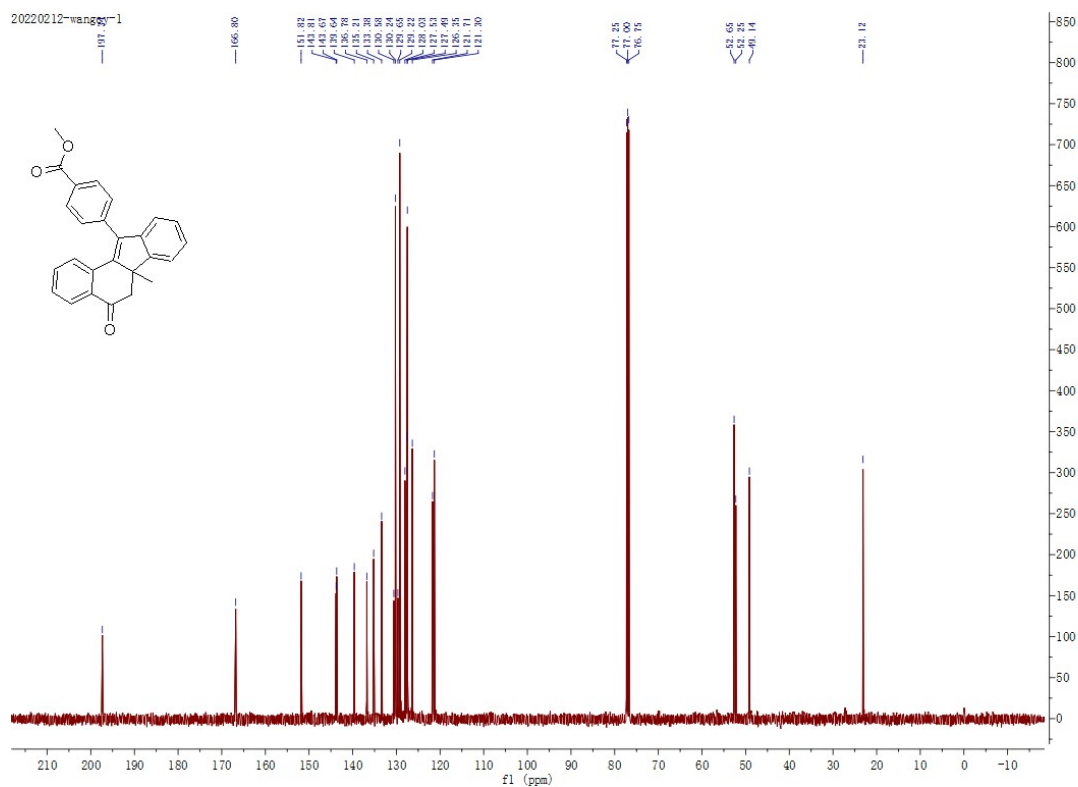

$^{13}\text{C}$  NMR (125 MHz,  $\text{CDCl}_3$ )

# 6a-Methyl-11-(*m*-tolyl)-6,6a-dihydro-5H-benzo[a]fluoren-5-one (3ga)

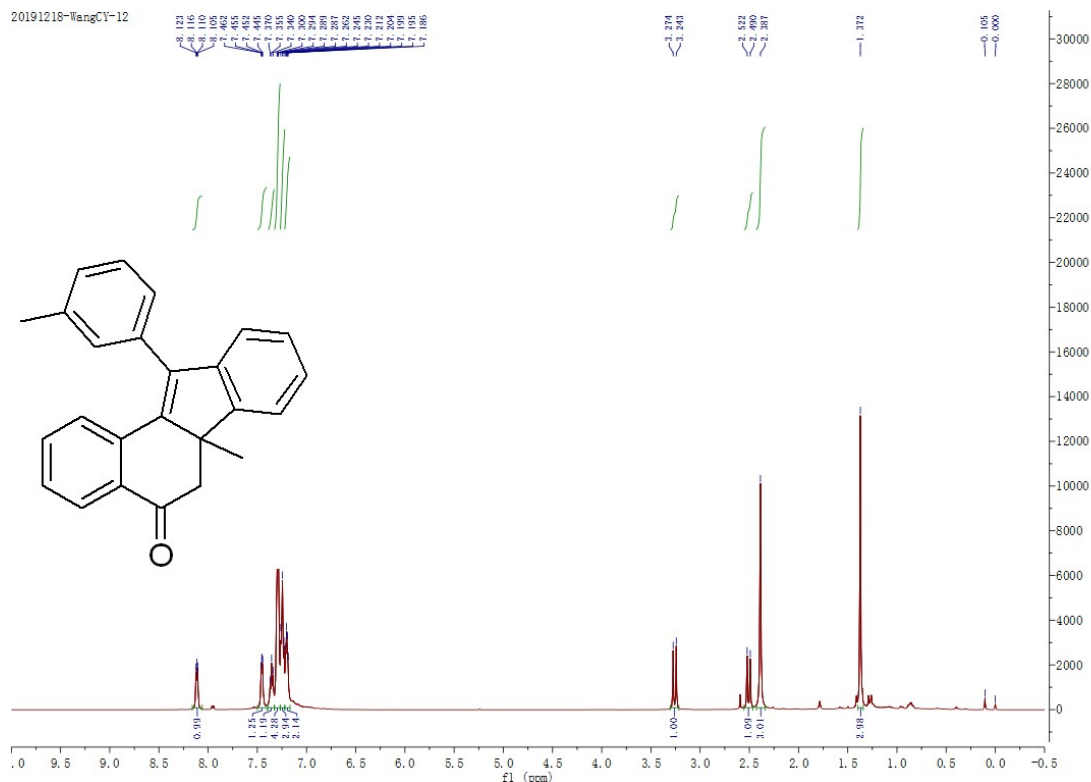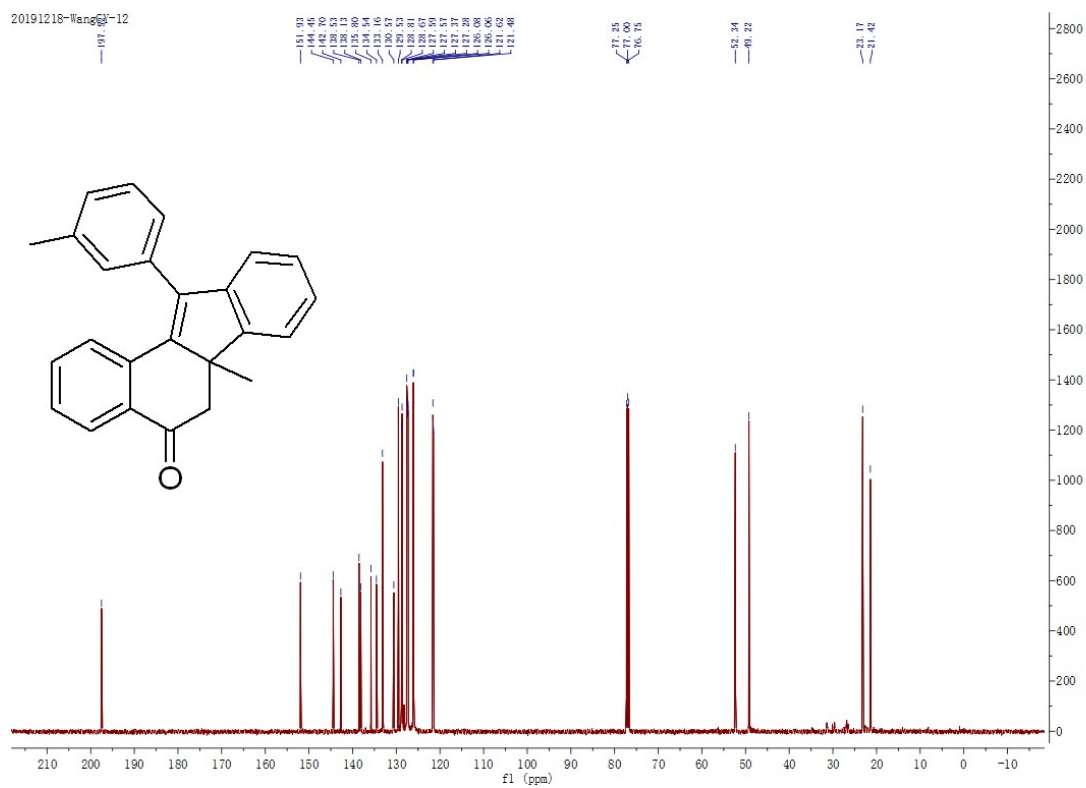

**6a-Methyl-11-(*o*-tolyl)-6,6a-dihydro-5H-benzo[*a*]fluoren-5-one (3ha)**

20200519-wcy-3

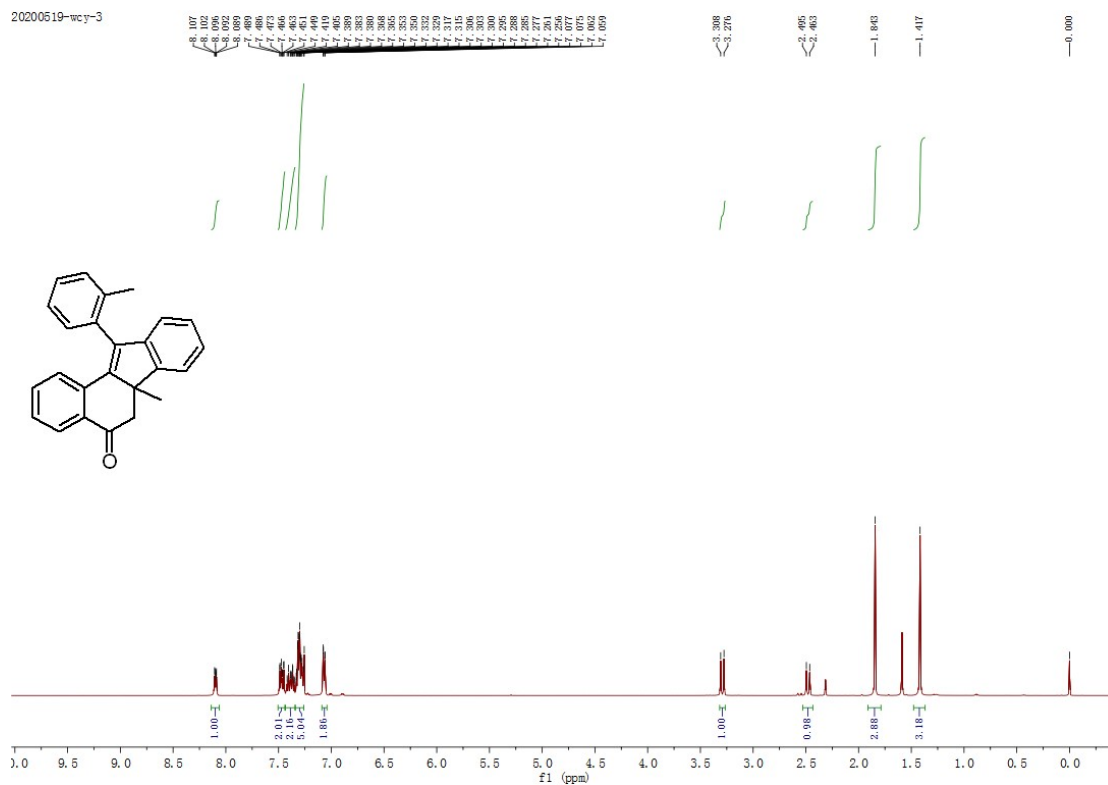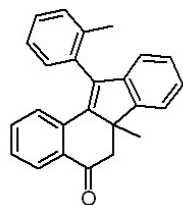

<sup>1</sup>H NMR (500 MHz, CDCl<sub>3</sub>)

20200519-wcy-3

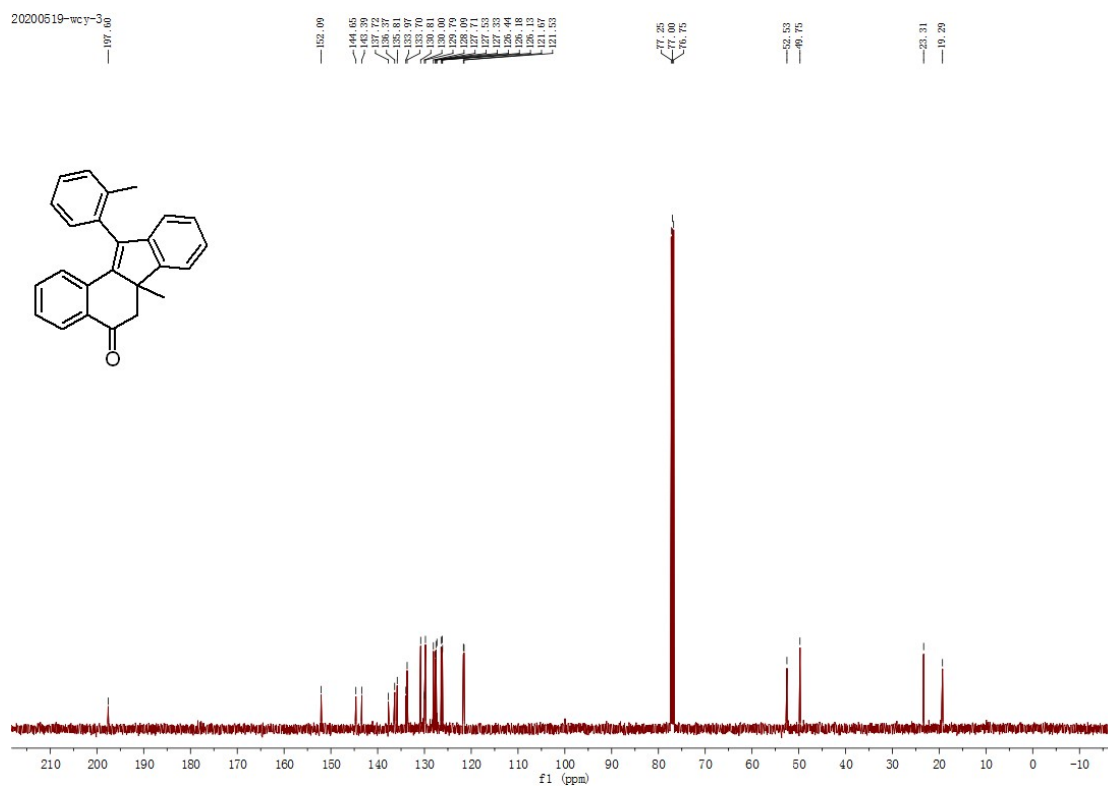

<sup>13</sup>C NMR (125 MHz, CDCl<sub>3</sub>)

**6a-Methyl-11-(thiophen-2-yl)-6,6a-dihydro-5H-benzo[a]fluoren-5-one (3ia)**

20191218-WangCY-1  
H

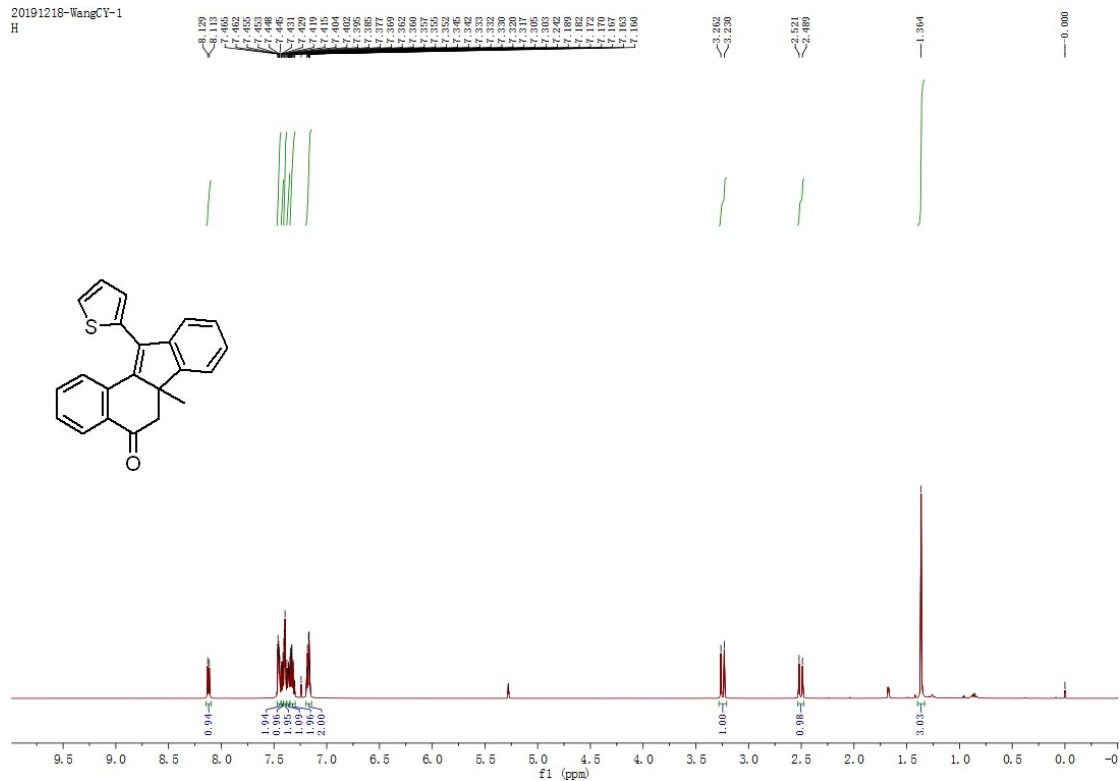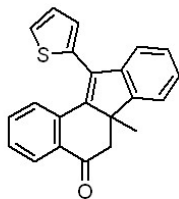

$^1\text{H NMR}$  (500 MHz,  $\text{CDCl}_3$ )

20191218-WangCY-1  
C

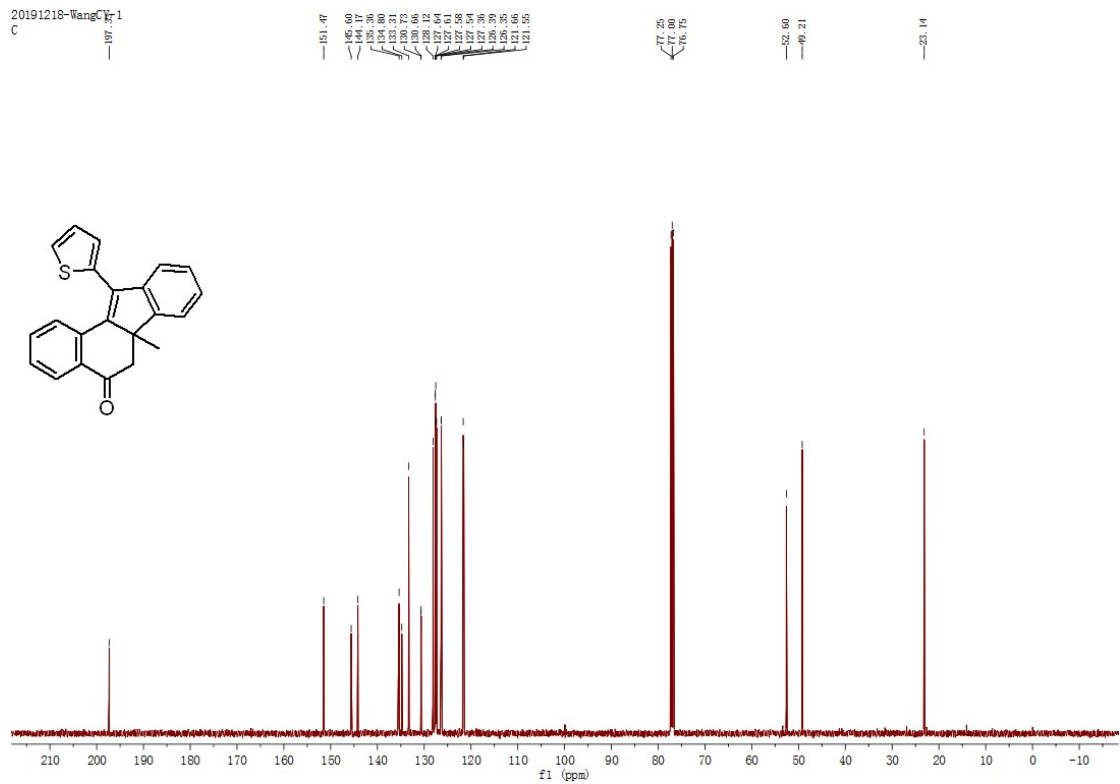

$^{13}\text{C NMR}$  (125 MHz,  $\text{CDCl}_3$ )

# 11-Hexyl-6a-methyl-6,6a-dihydro-5H-benzo[*a*]fluoren-5-one (3ja)

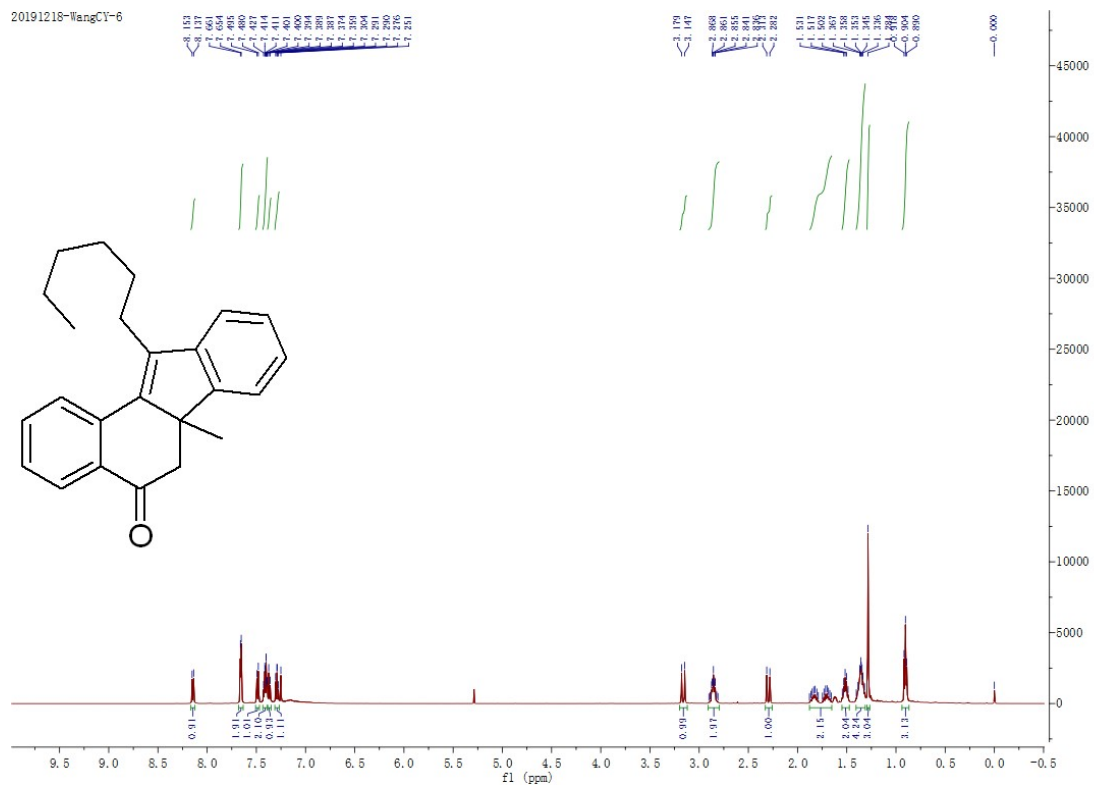

<sup>1</sup>H NMR (500 MHz, CDCl<sub>3</sub>)

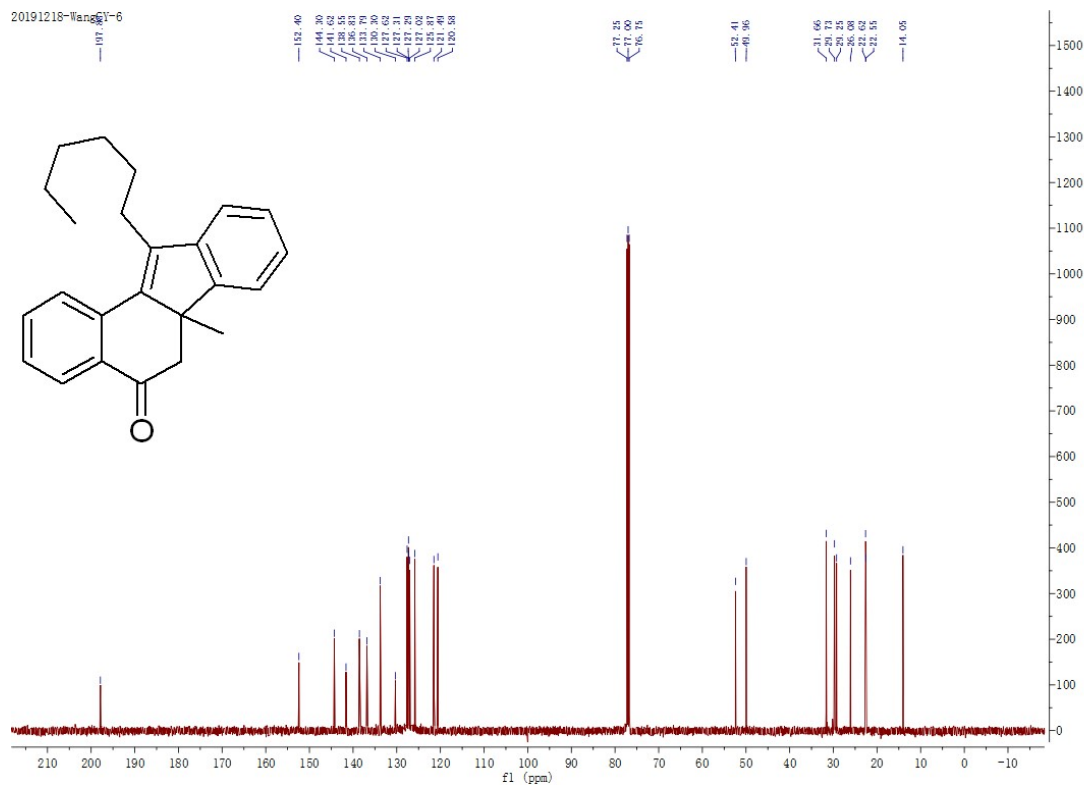

<sup>13</sup>C NMR (125 MHz, CDCl<sub>3</sub>)



# 6a-Methyl-11-(trimethylsilyl)-6,6a-dihydro-5H-benzo[a]fluoren-5-one (31a)

20200110-Wangcy-17

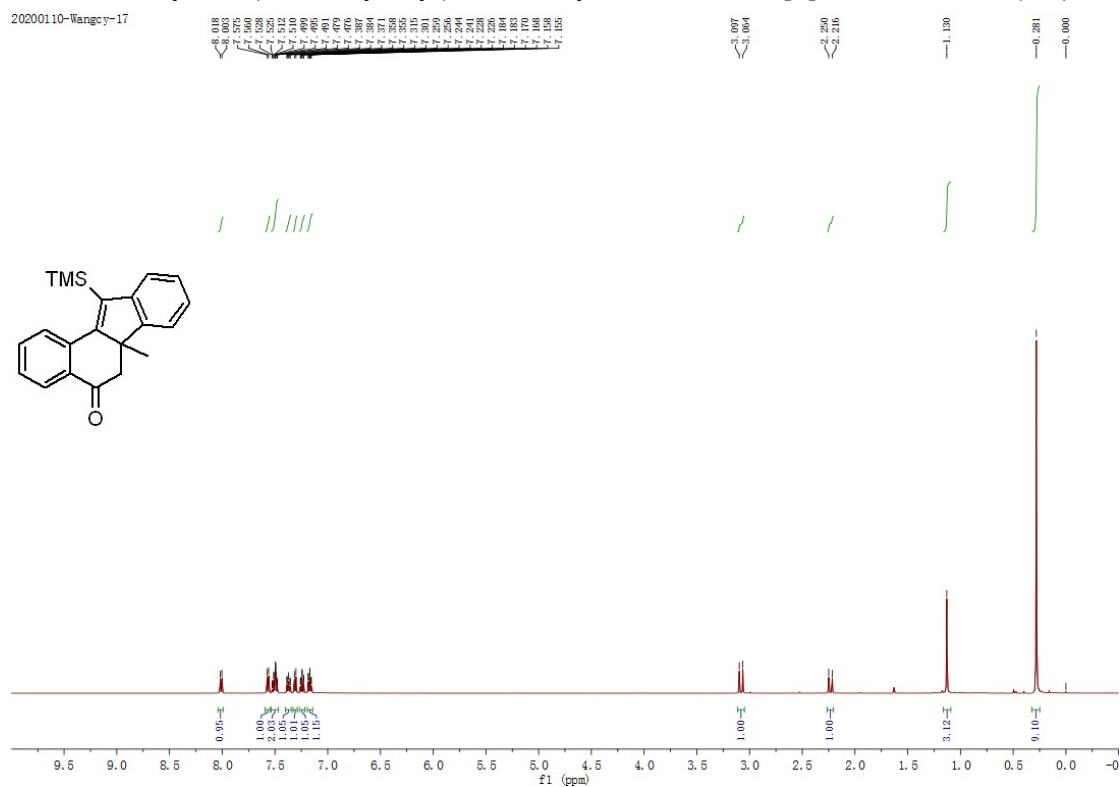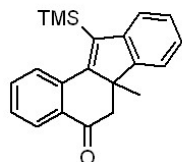

**<sup>1</sup>H NMR (500 MHz, CDCl<sub>3</sub>)**

20200110-Wangcy-17

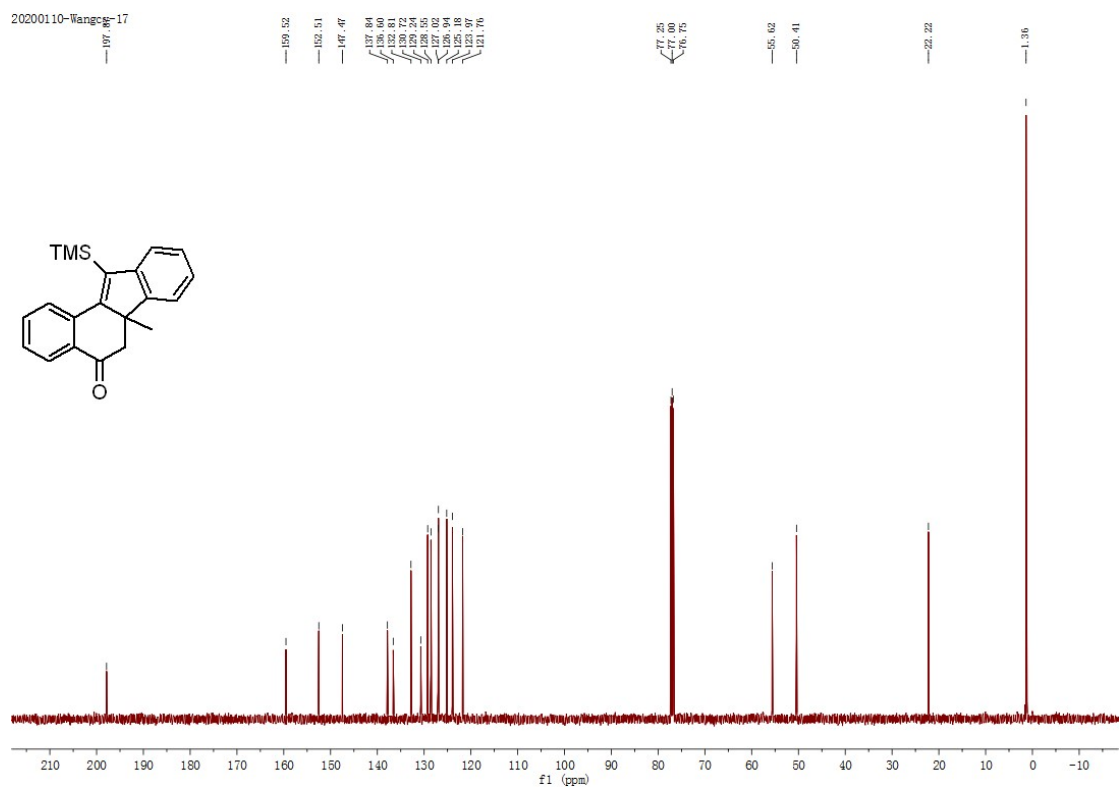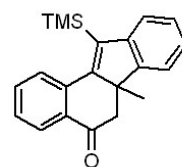

**<sup>13</sup>C NMR (125 MHz, CDCl<sub>3</sub>)**

### 2,6a-Dimethyl-11-phenyl-6,6a-dihydro-5H-benzo[*a*]fluoren-5-one (3ma)

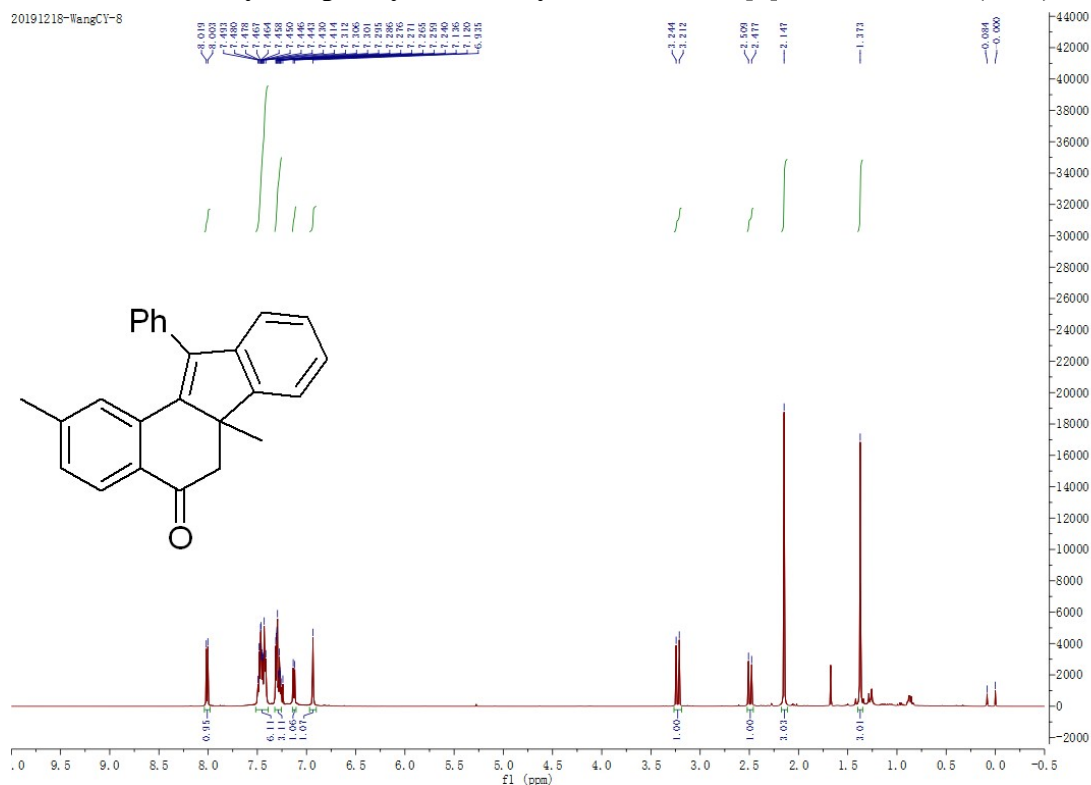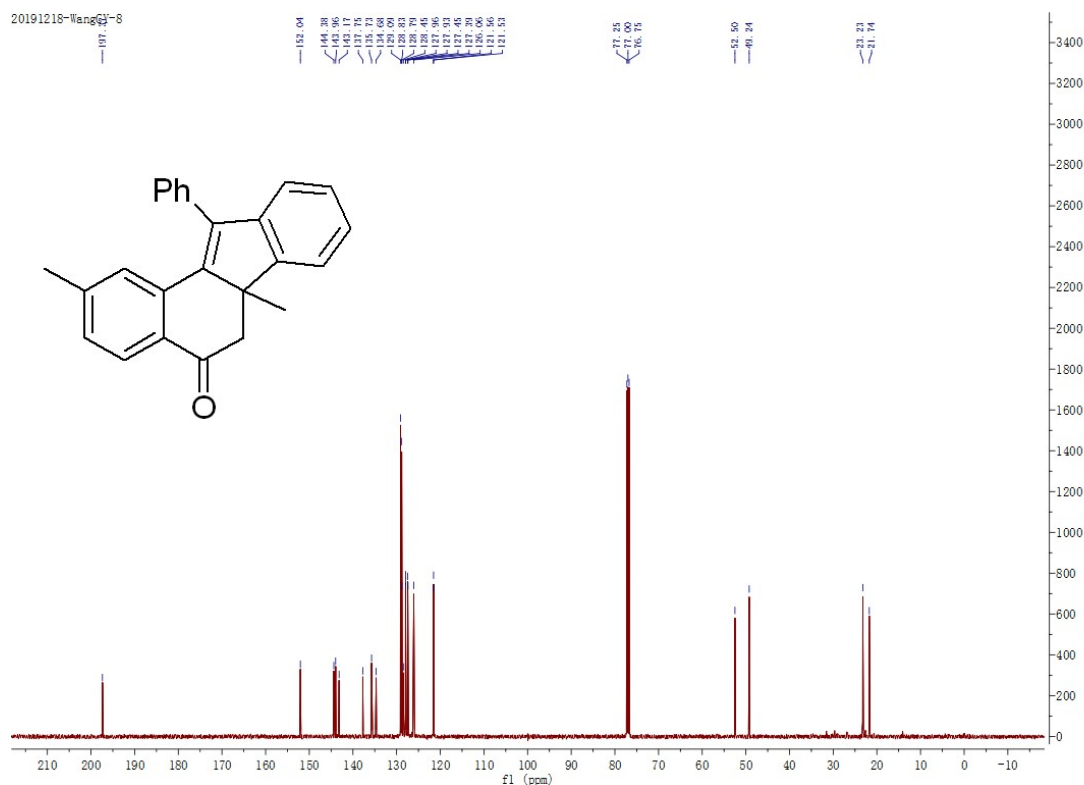



## 2-Fluoro-6a-methyl-11-phenyl-6,6a-dihydro-5H-benzo[a]fluoren-5-one (3na)

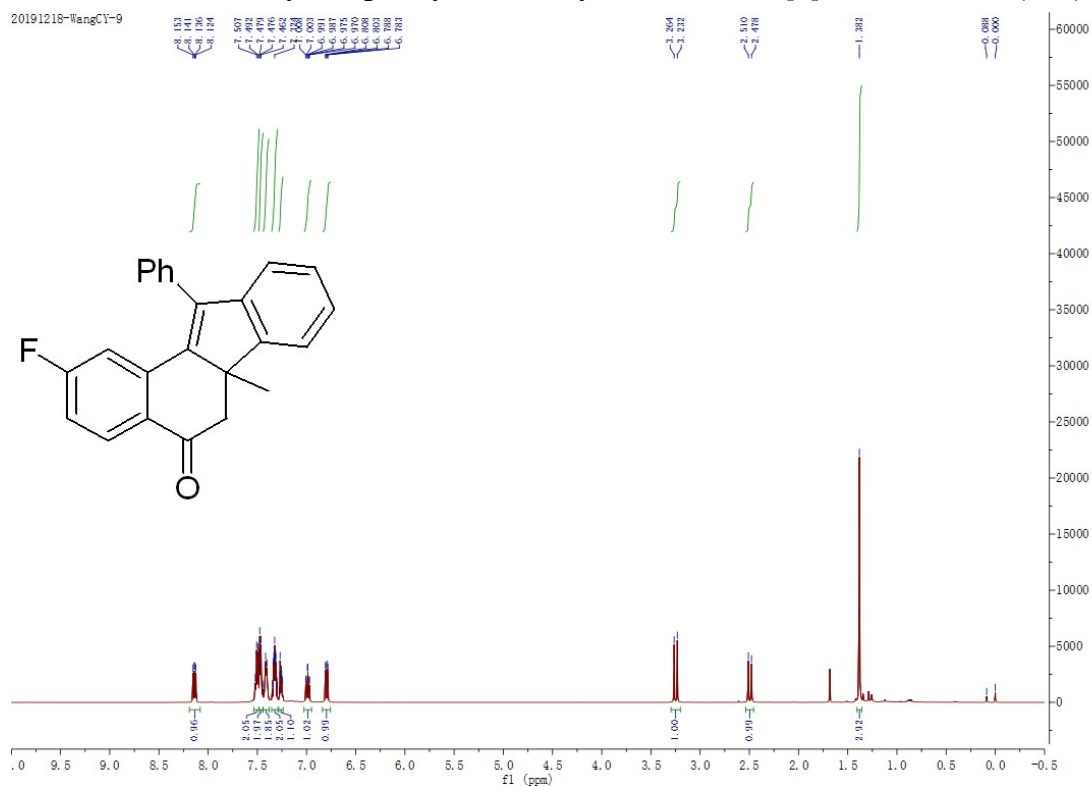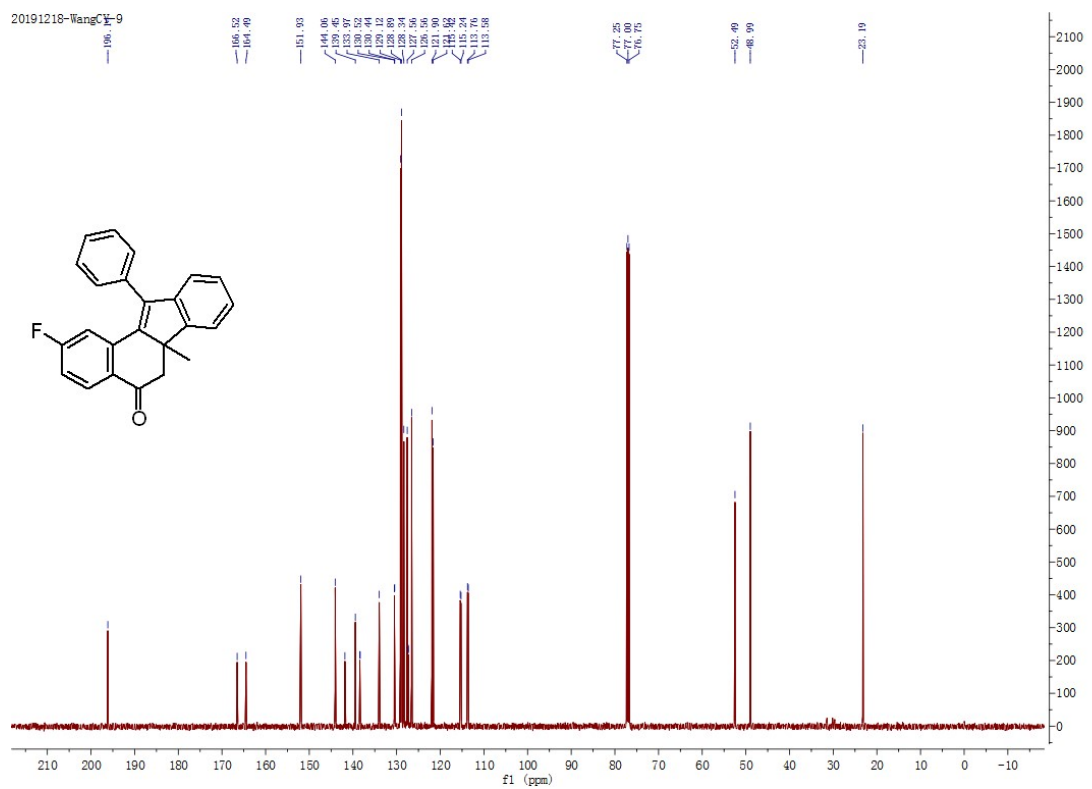

103.51

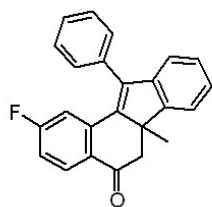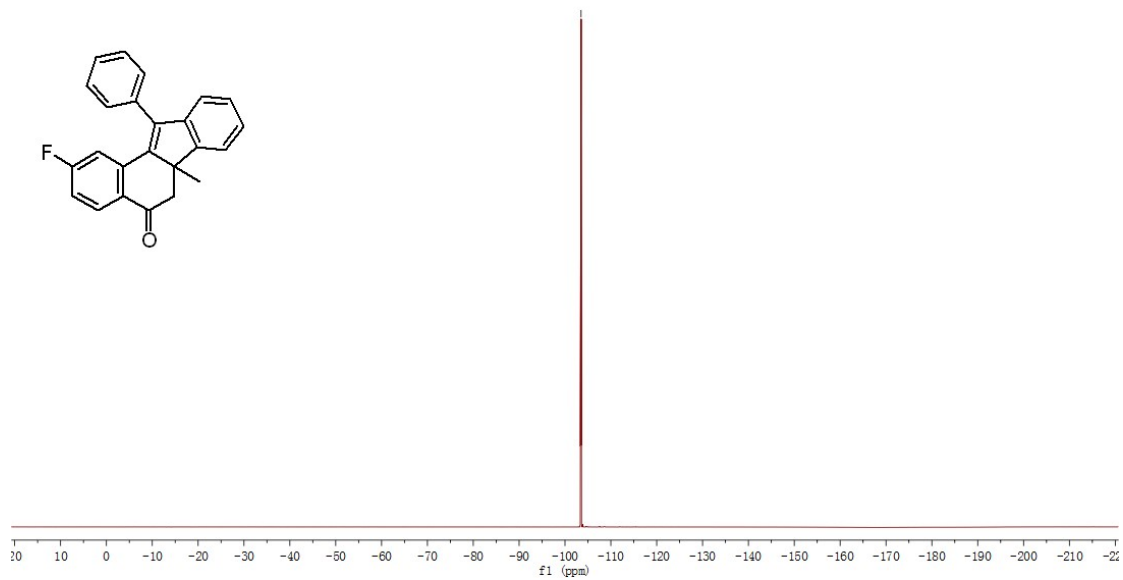

**<sup>19</sup>F NMR (471 MHz, CDCl<sub>3</sub>)**

## 2-Chloro-6a-methyl-11-phenyl-6,6a-dihydro-5H-benzo[a]fluoren-5-one (3oa)

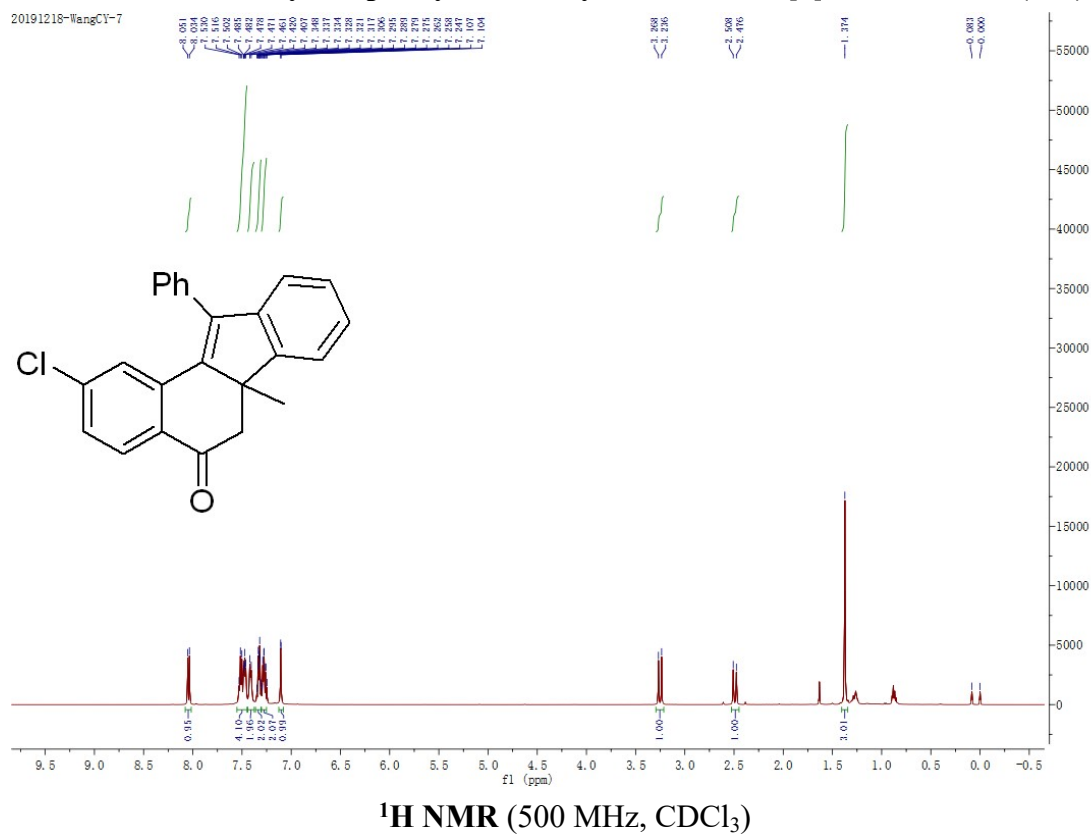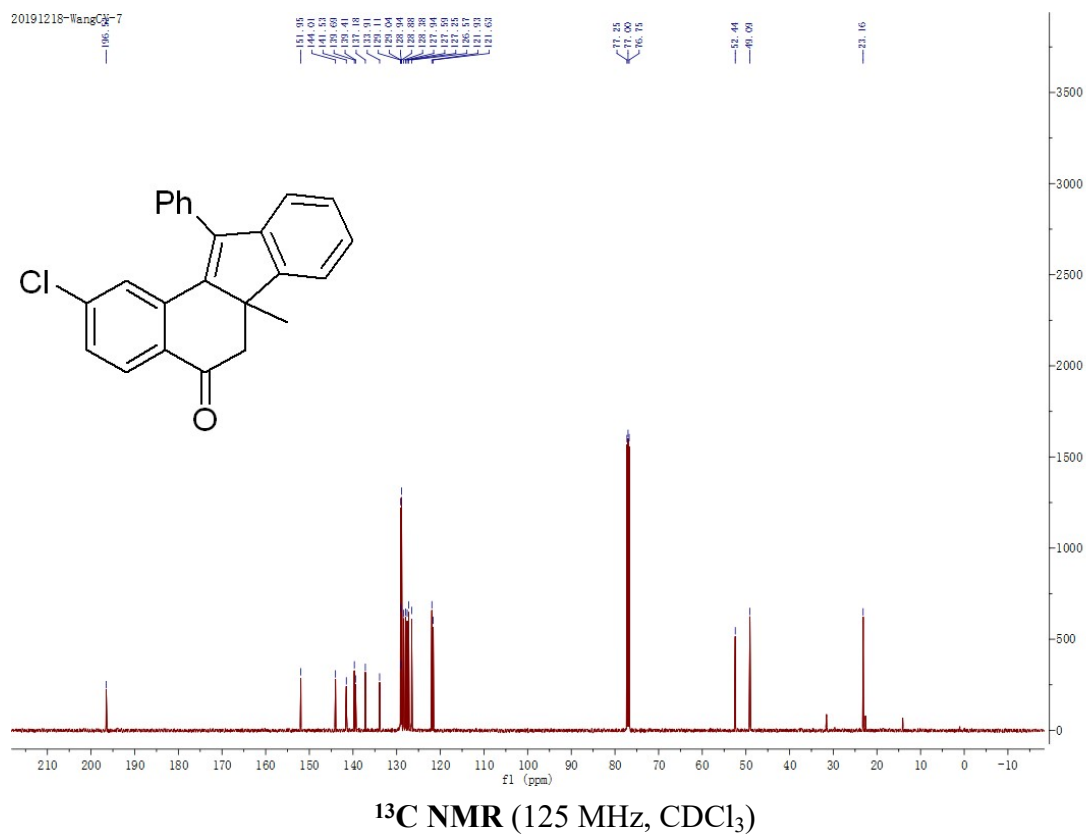

### 3-Methoxy-6a-methyl-11-phenyl-6,6a-dihydro-5H-benzo[*a*]fluoren-5-one (3pa)

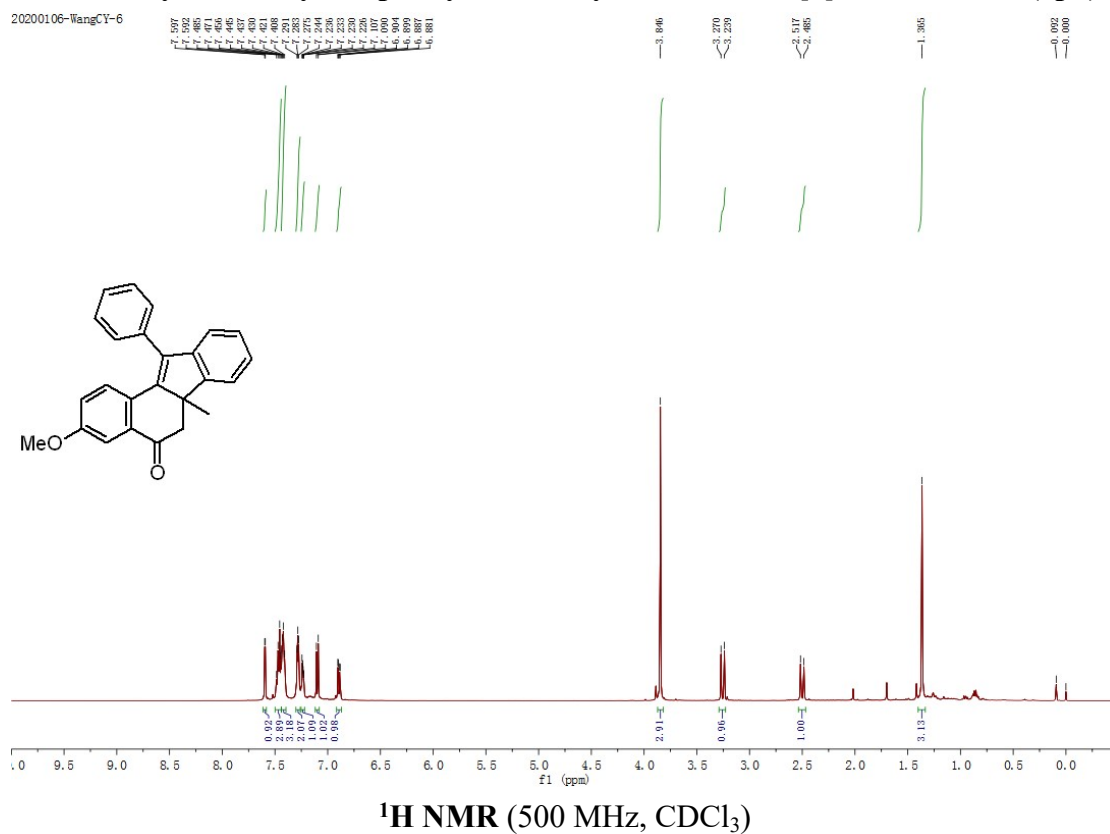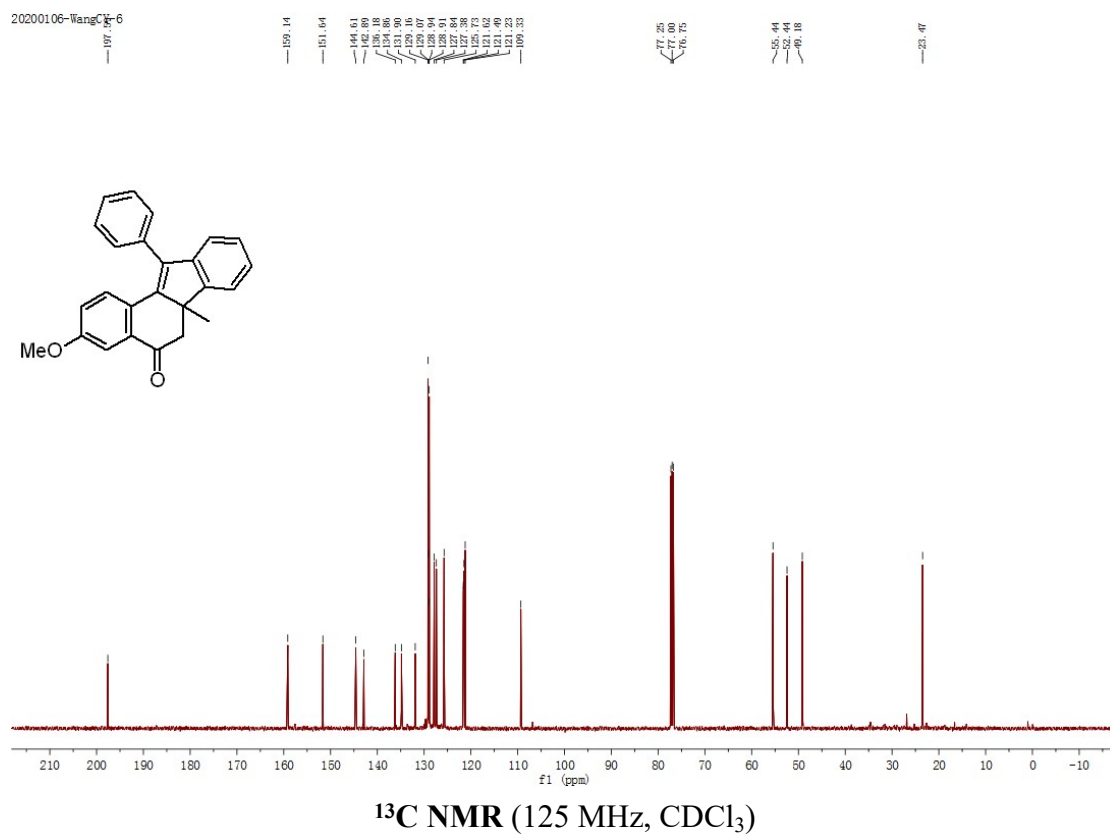

### 3-Chloro-6a-methyl-11-phenyl-6,6a-dihydro-5H-benzo[*a*]fluoren-5-one (3qa)

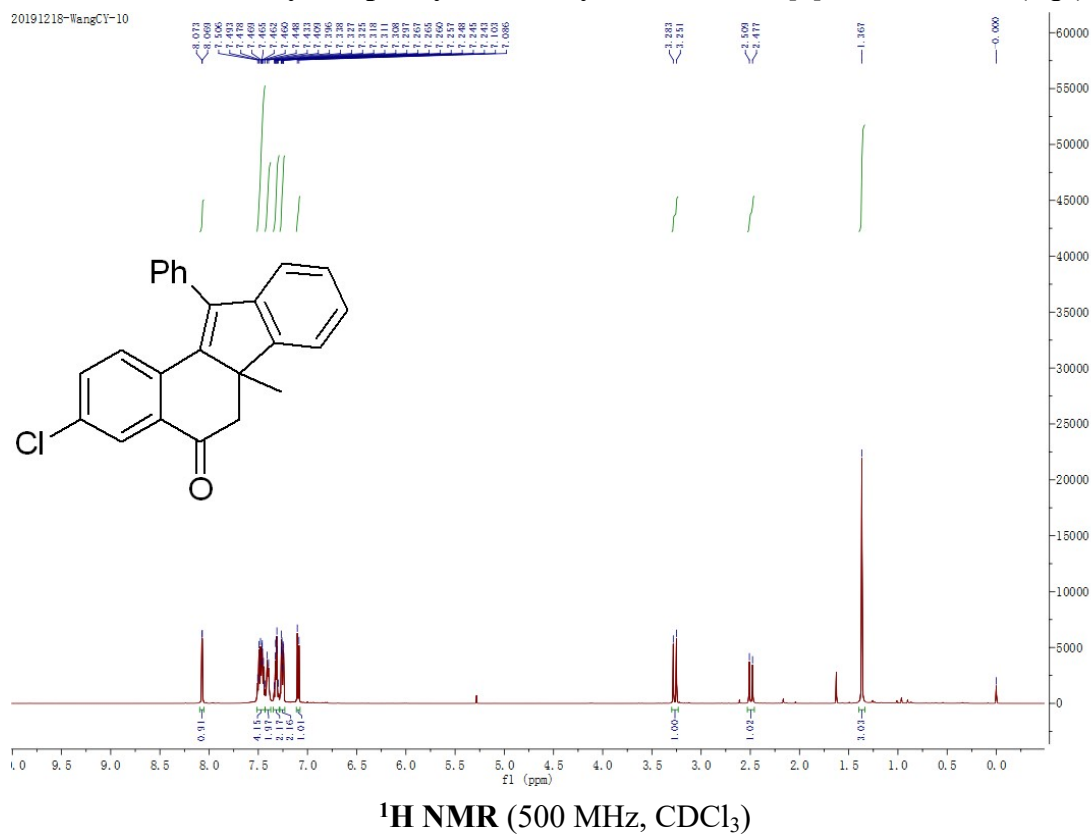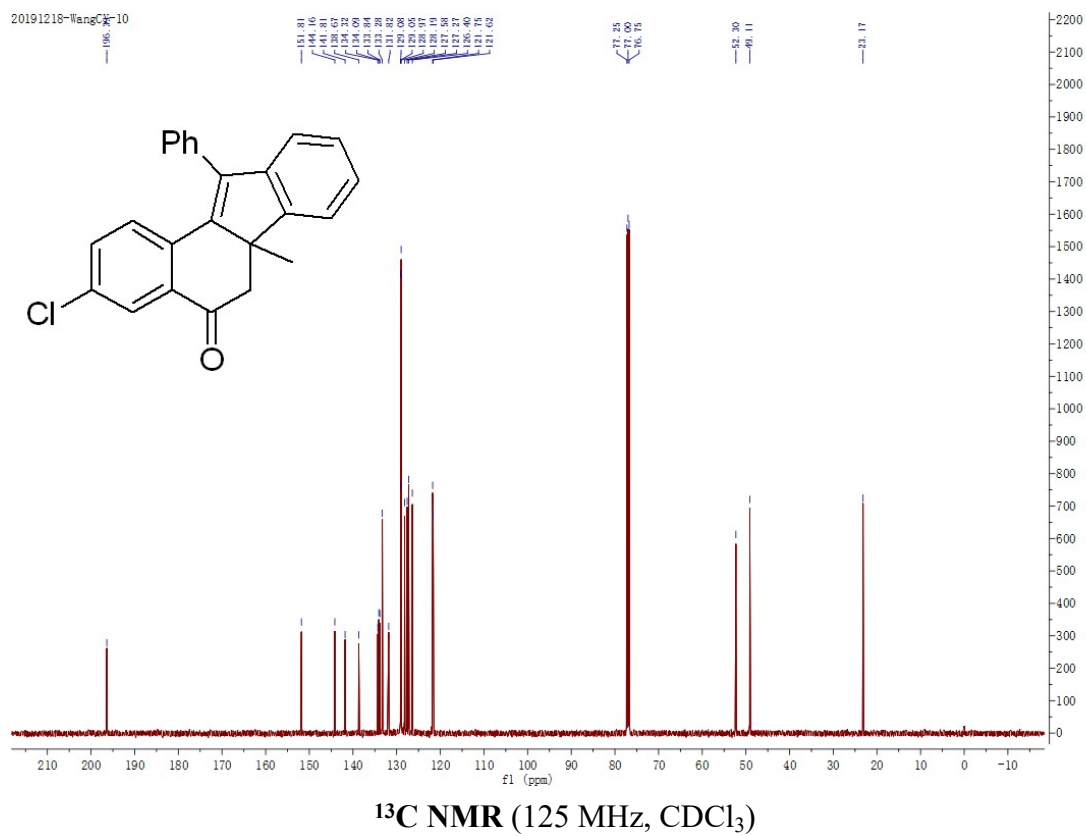

# 6a-Methyl-11-phenyl-3-(trifluoromethyl)-6,6a-dihydro-5H-benzo[a]fluoren-5-one (3ra)

20200519-wcy-2

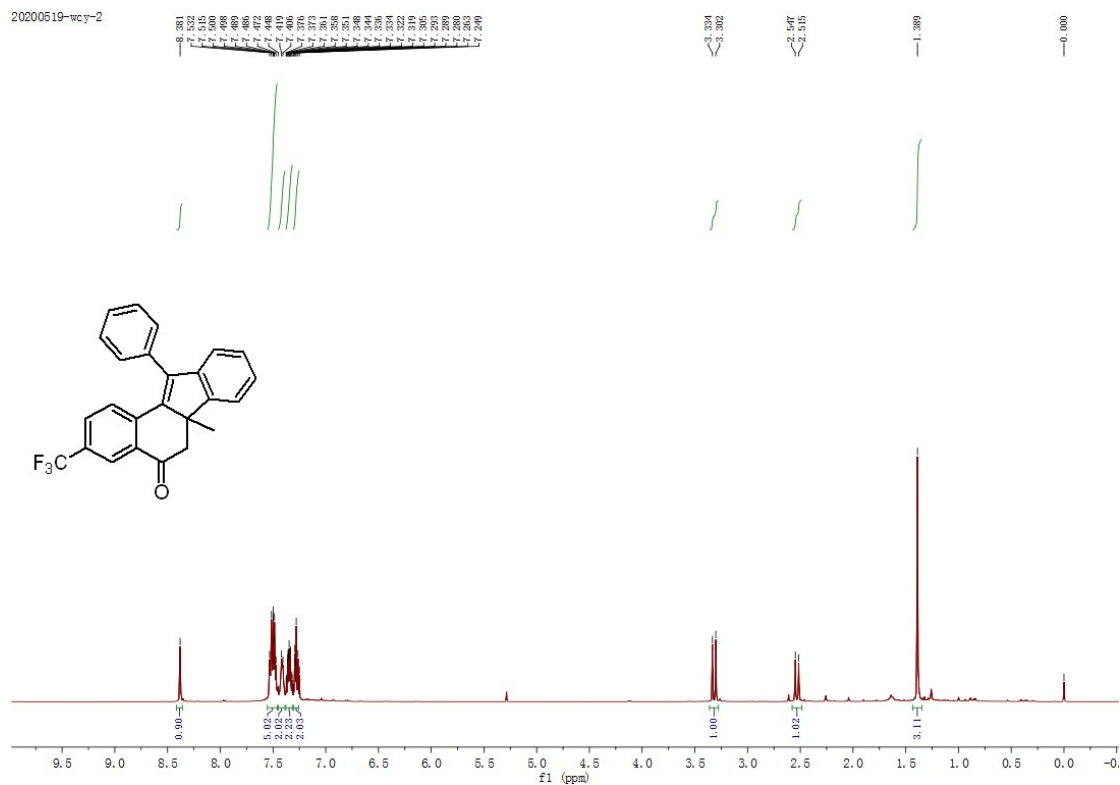

20200603-WANGCY-2

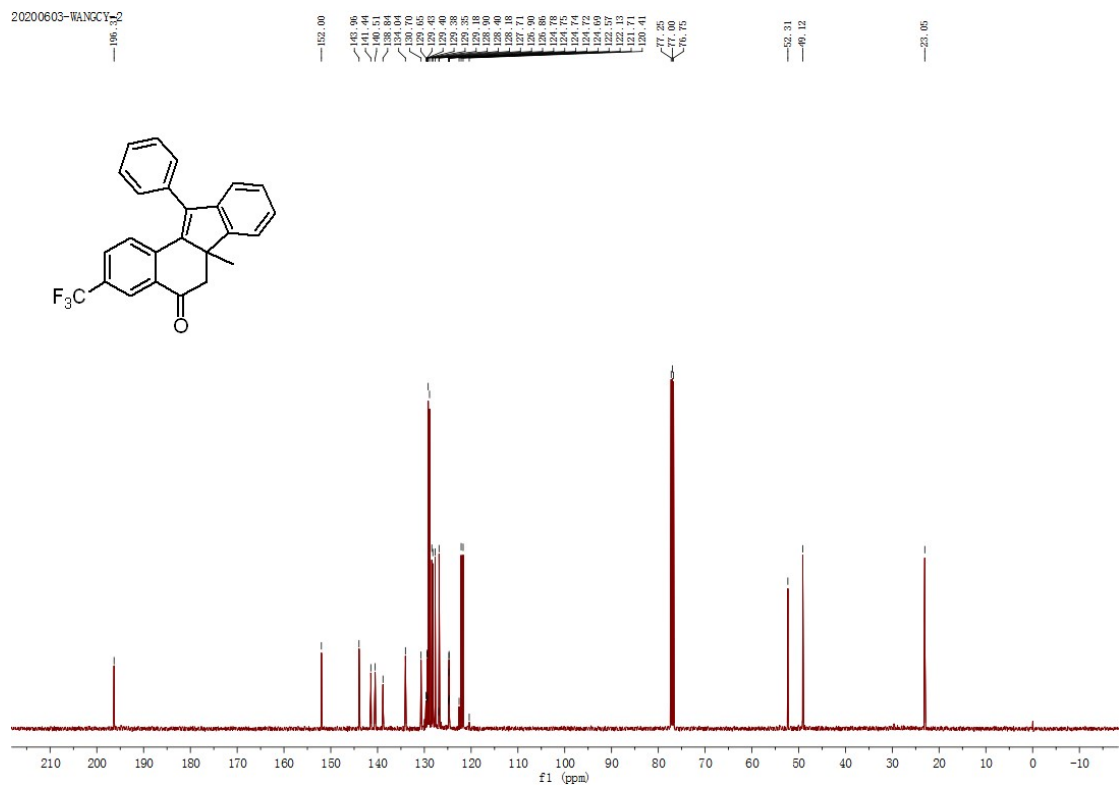

20200519-wcy-2

62.89

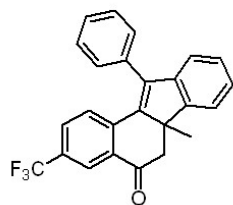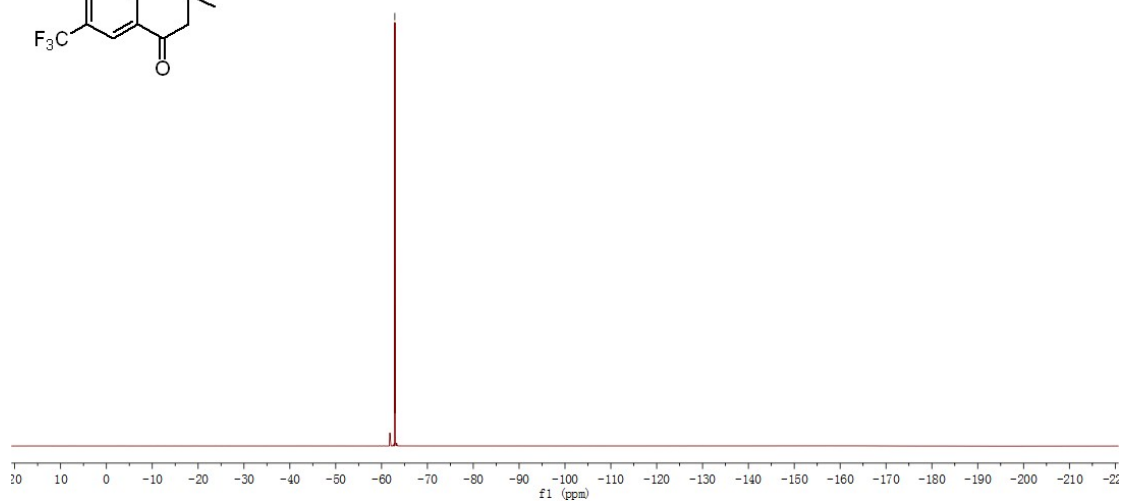

$^{19}\text{F}$  NMR (471 MHz,  $\text{CDCl}_3$ )

# 11-Phenyl-6a-propyl-6,6a-dihydro-5H-benzo[*a*]fluoren-5-one (3ab)

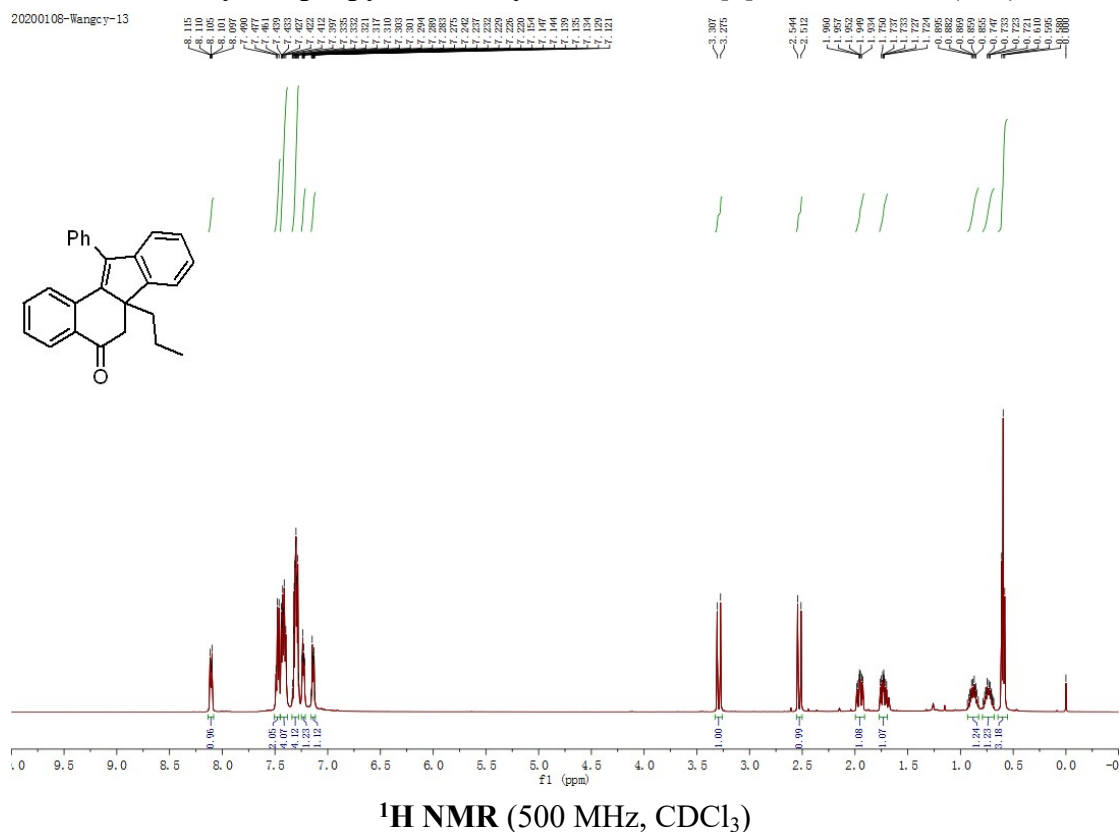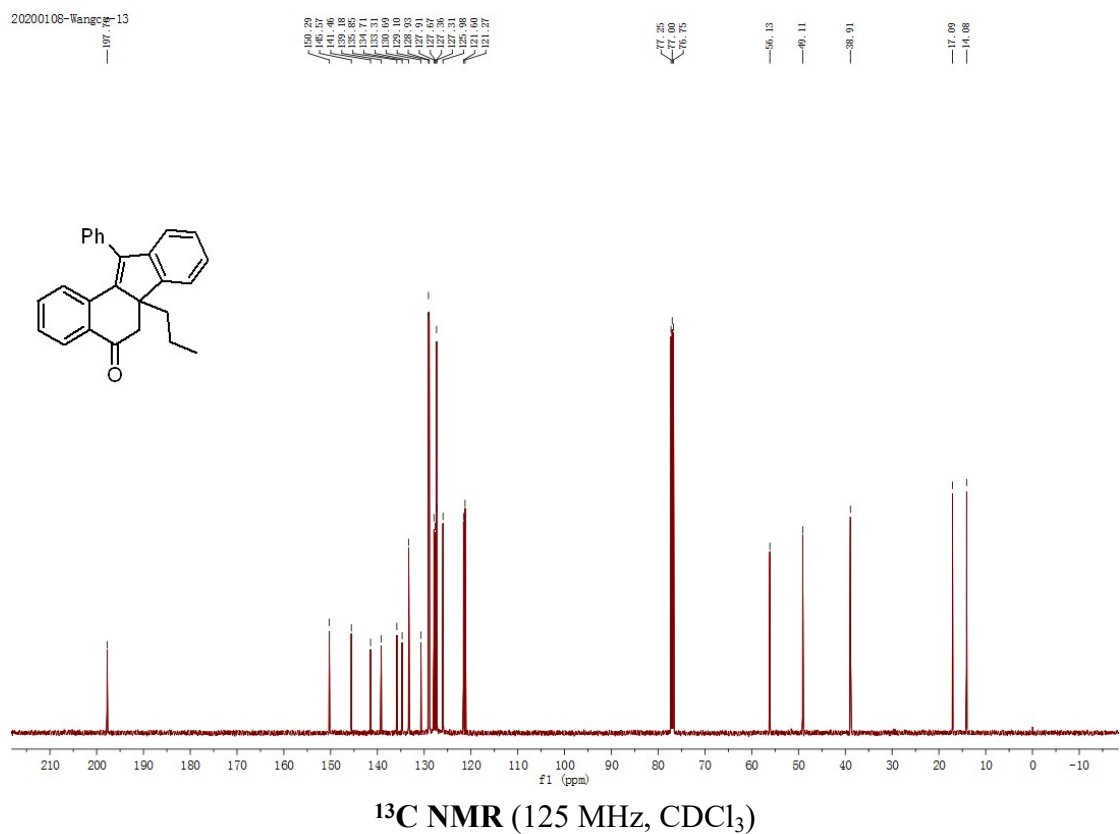



# 6a,11-Diphenyl-6,6a-dihydro-5H-benzo[*a*]fluoren-5-one (3ac)

20200609-Wangcy-11

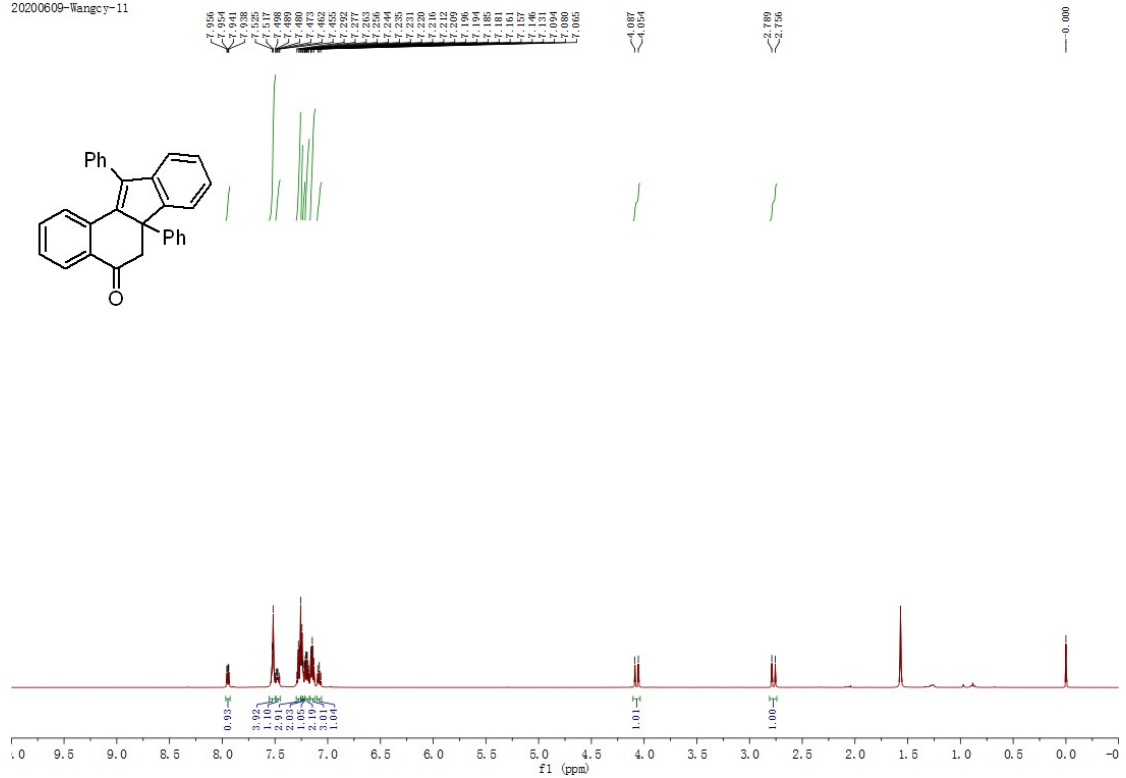

20200609-Wangcy-11

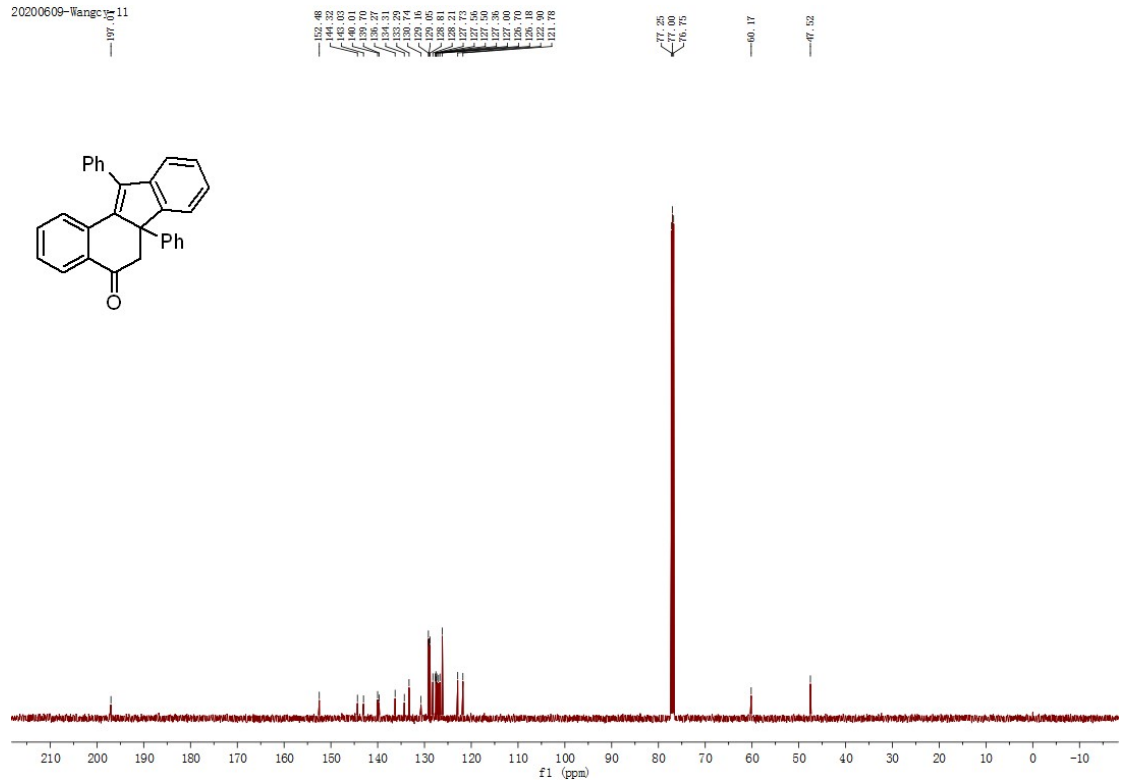

# 6a,9-Dimethyl-11-phenyl-6,6a-dihydro-5H-benzo[a]fluoren-5-one (3ae)

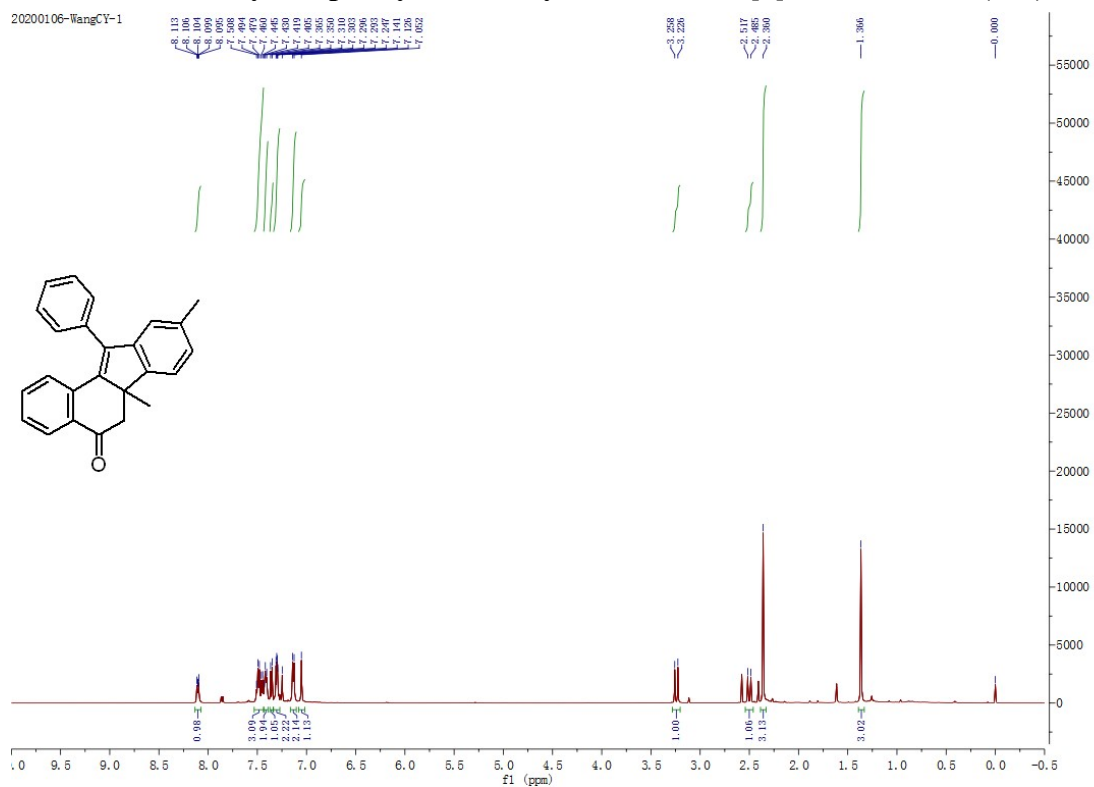

$^1\text{H}$  NMR (500 MHz,  $\text{CDCl}_3$ )

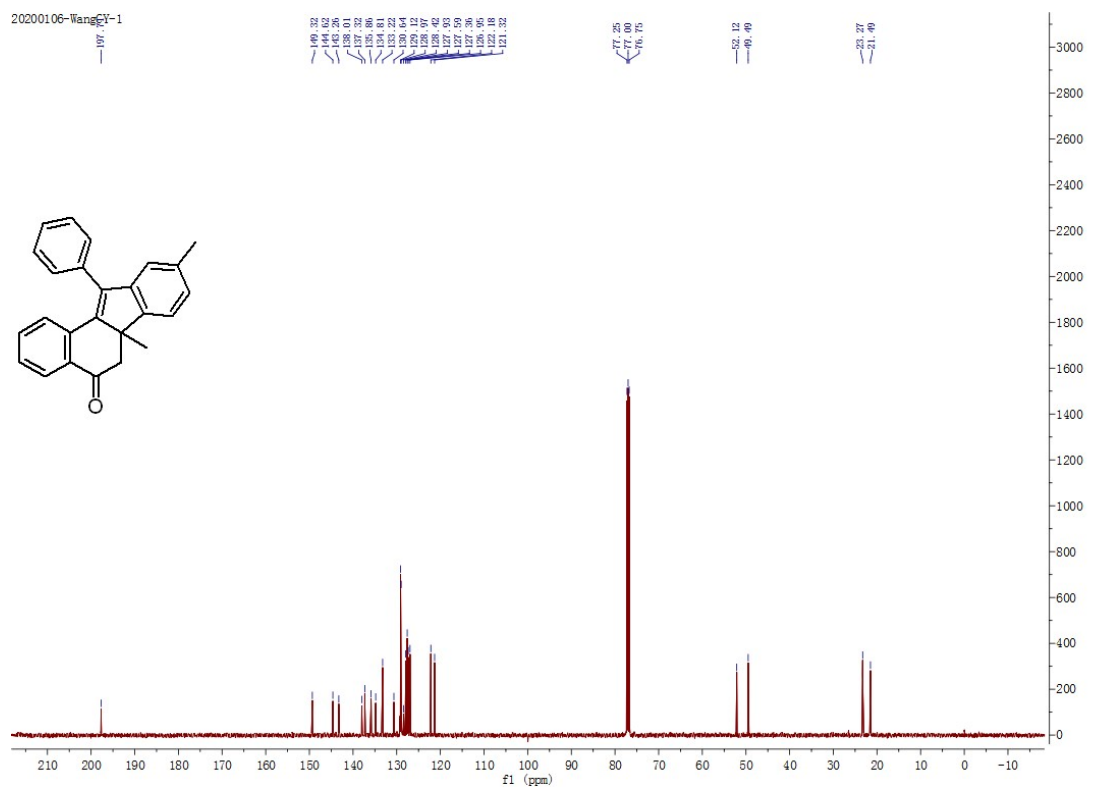

$^{13}\text{C}$  NMR (125 MHz,  $\text{CDCl}_3$ )

# 9-Chloro-6a-methyl-11-phenyl-6,6a-dihydro-5H-benzo[a]fluoren-5-one (3af)

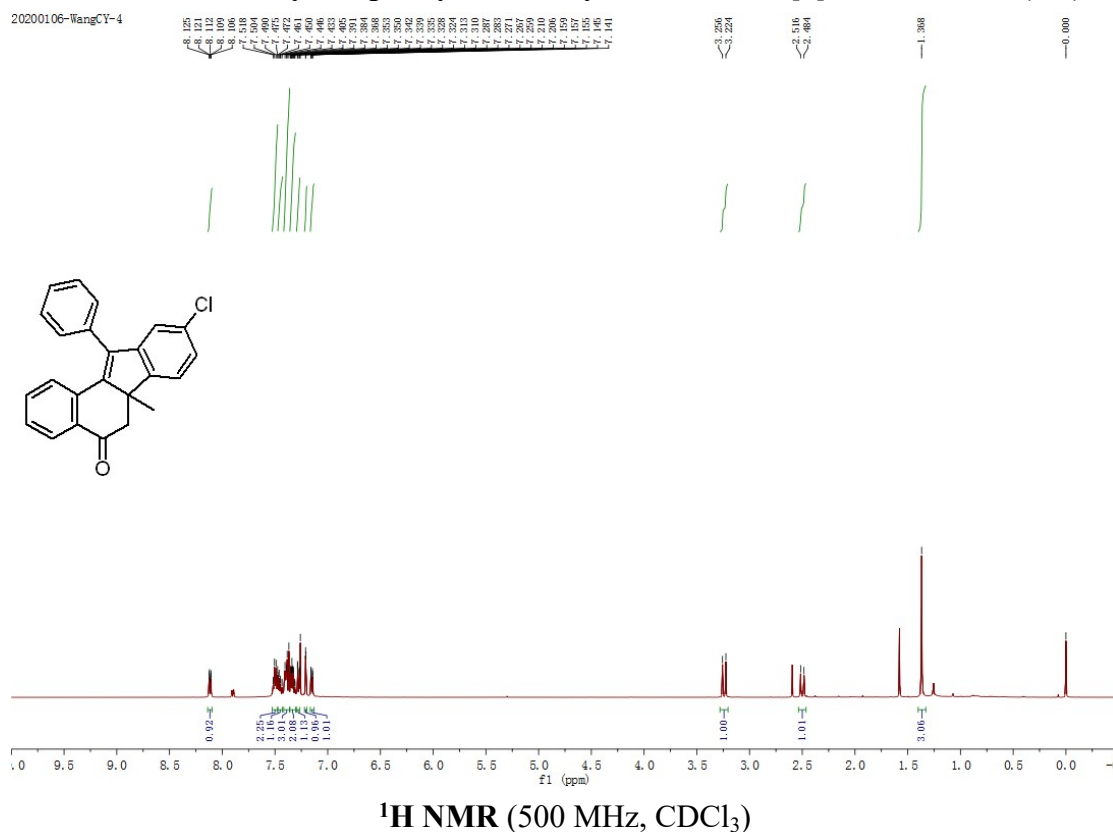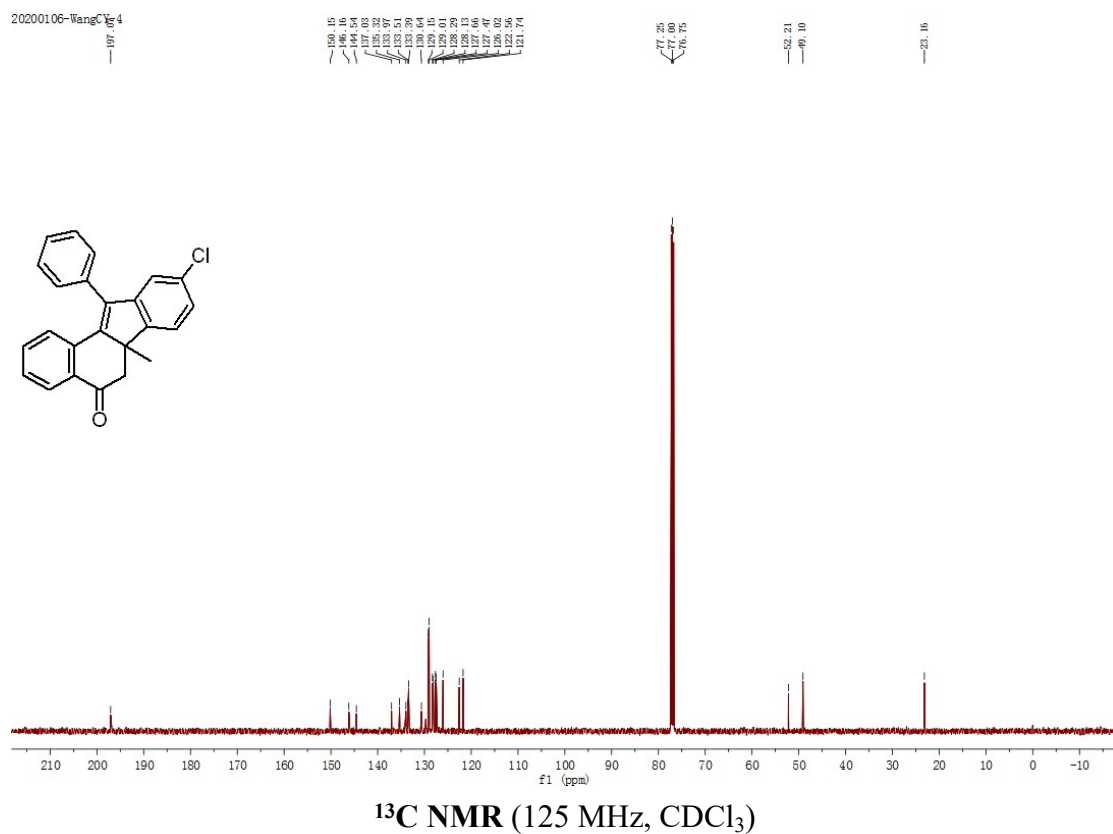

# 9-Iodo-6a-methyl-11-phenyl-6,6a-dihydro-5H-benzo[a]fluoren-5-one (3ag)

20220322-Wangcy-1

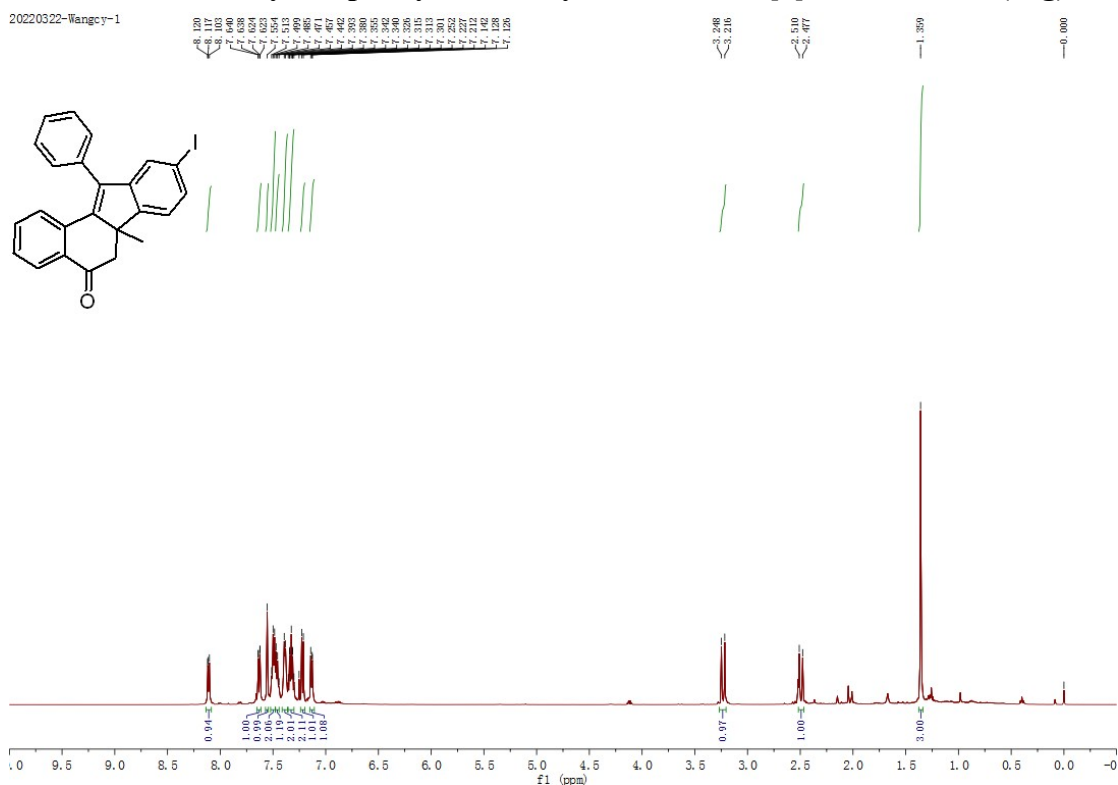

<sup>1</sup>H NMR (500 MHz, CDCl<sub>3</sub>)

20220322-Wangcy-1

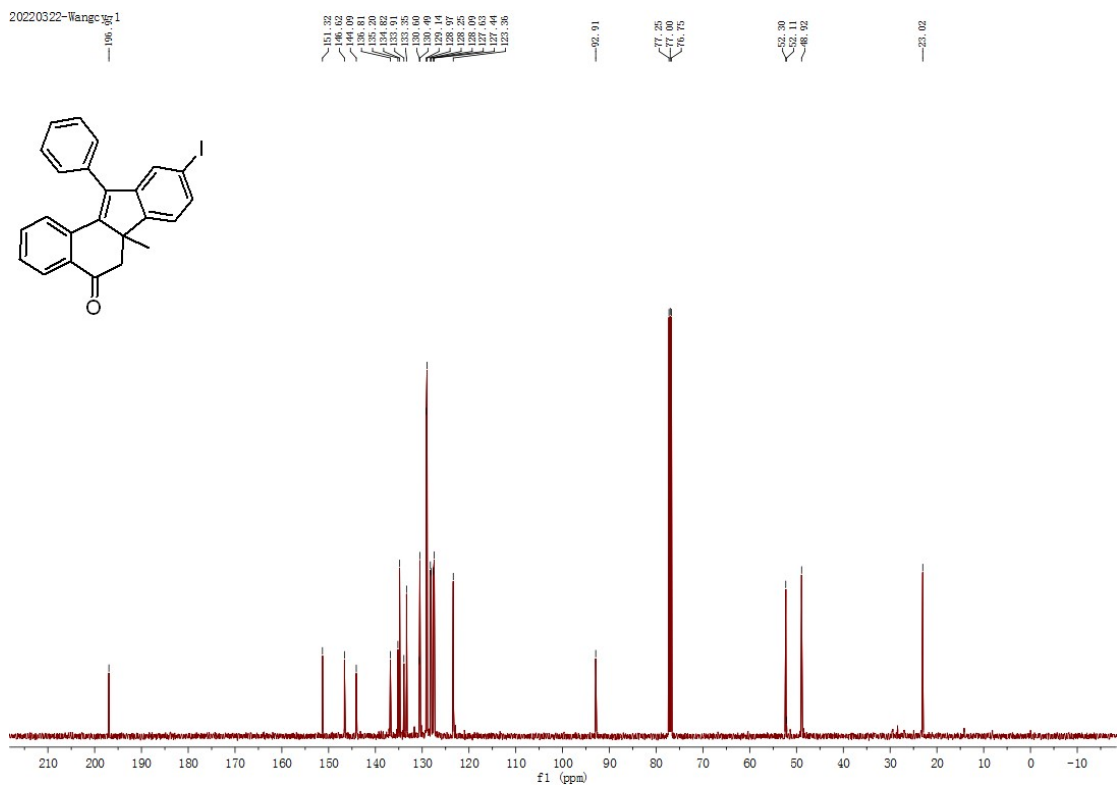

<sup>13</sup>C NMR (125 MHz, CDCl<sub>3</sub>)



# 10-Methoxy-6a-methyl-11-phenyl-6,6a-dihydro-5H-benzo[a]fluoren-5-one (3ai)

20220325-Wangcy-3

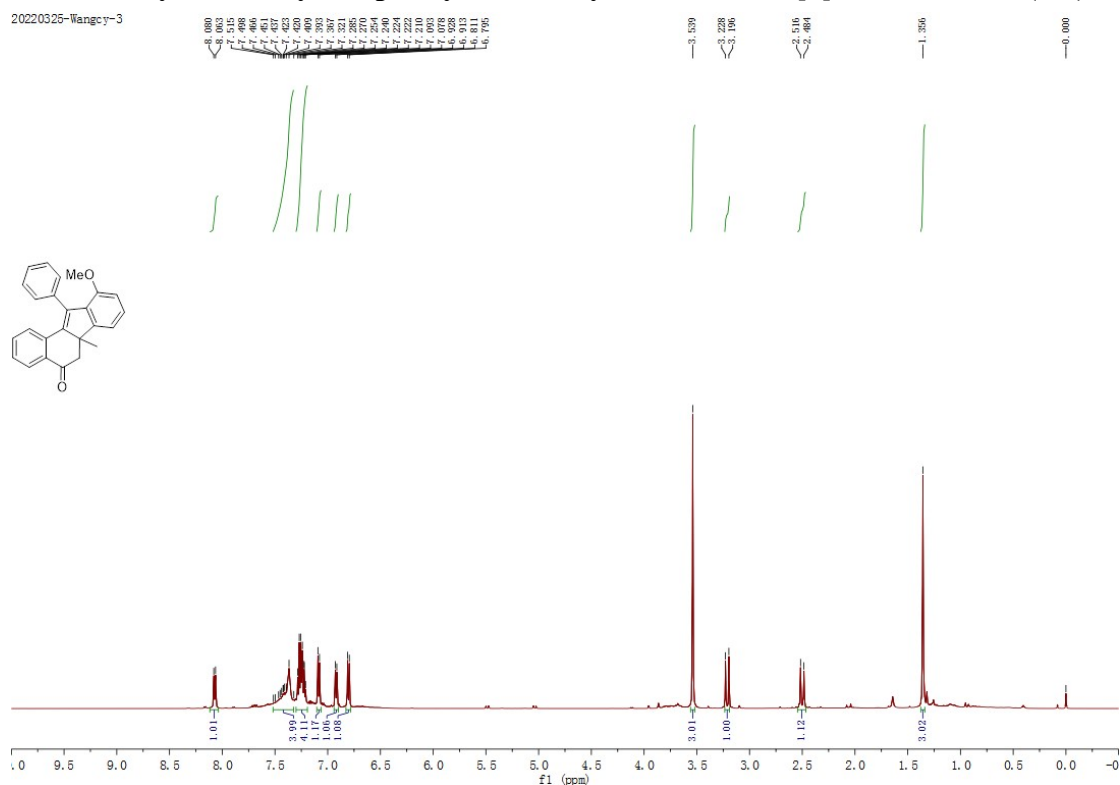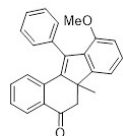

<sup>1</sup>H NMR (500 MHz, CDCl<sub>3</sub>)

20220325-Wangcy-3

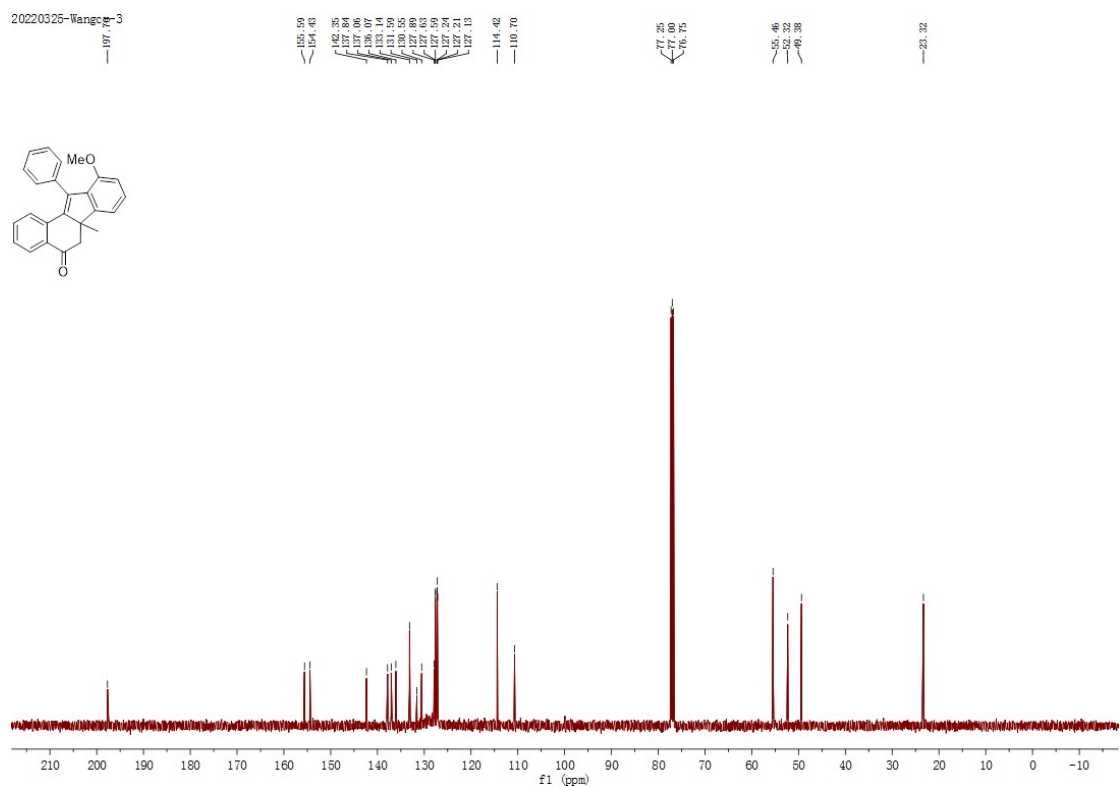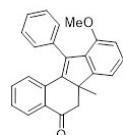

<sup>13</sup>C NMR (125 MHz, CDCl<sub>3</sub>)

# 8-Methoxy-6a-methyl-11-phenyl-6,6a-dihydro-5H-benzo[*a*]fluoren-5-one (3ai')

20220325-Wangcy-5

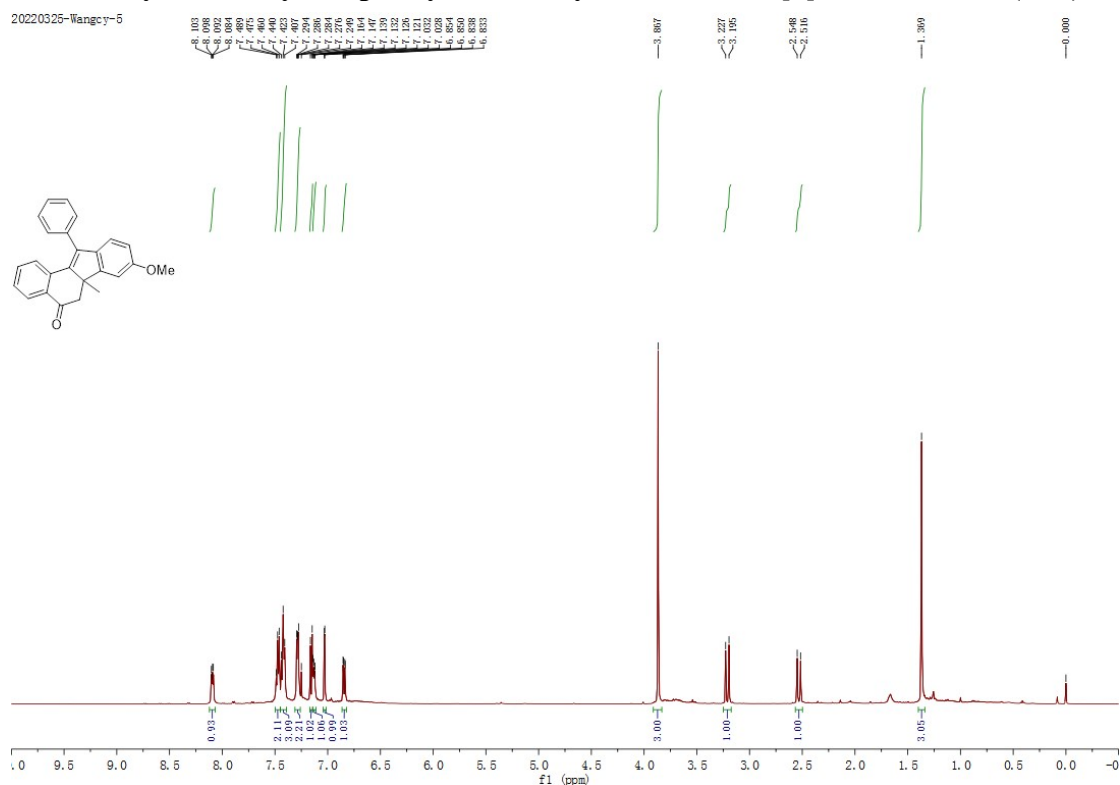

20220325-Wangcy-5

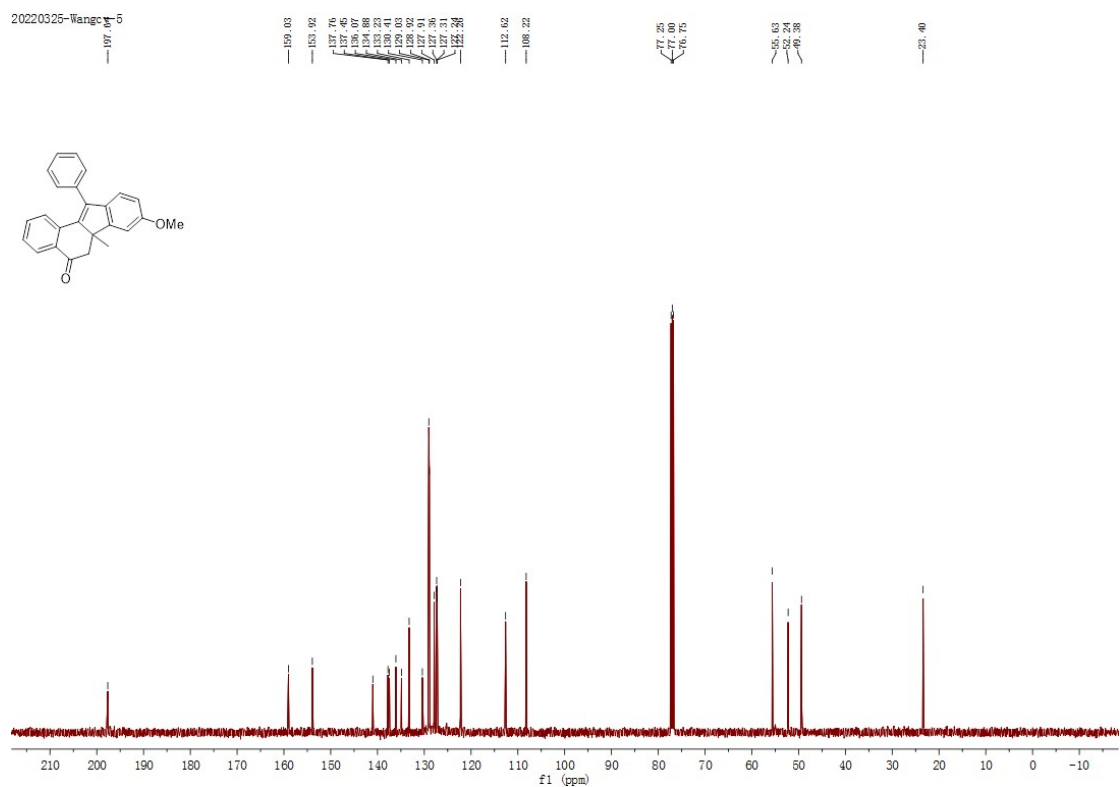





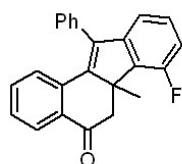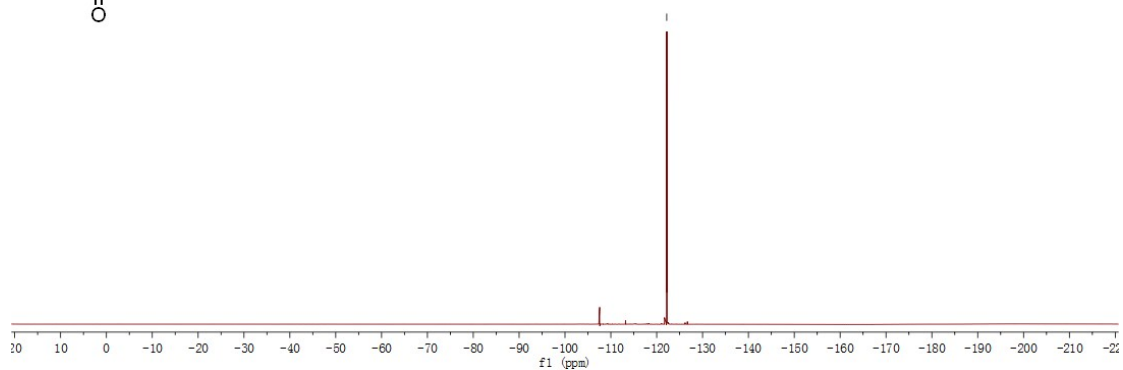

$^{19}\text{F}$  NMR (471 MHz,  $\text{CDCl}_3$ )



20220212-wangcy-6

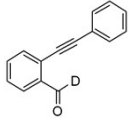

### 1a-D<sub>1</sub> (>99%D)

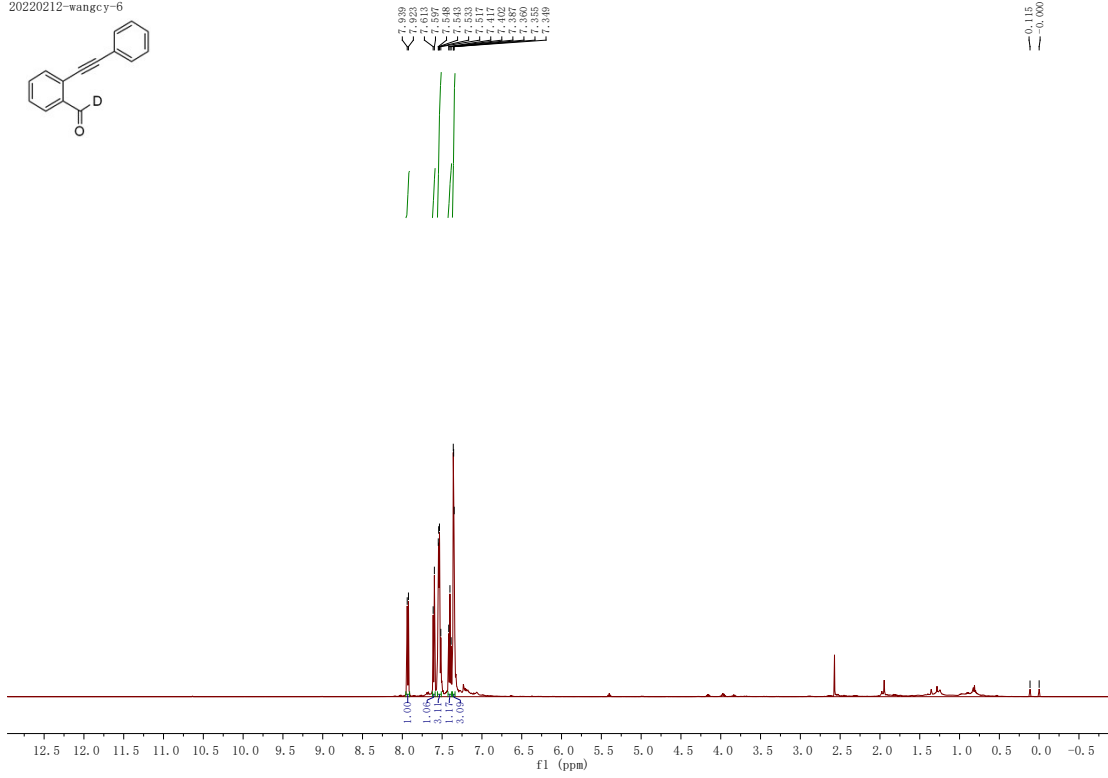

<sup>1</sup>H NMR (500 MHz, CDCl<sub>3</sub>)

20220212-wangcy-6

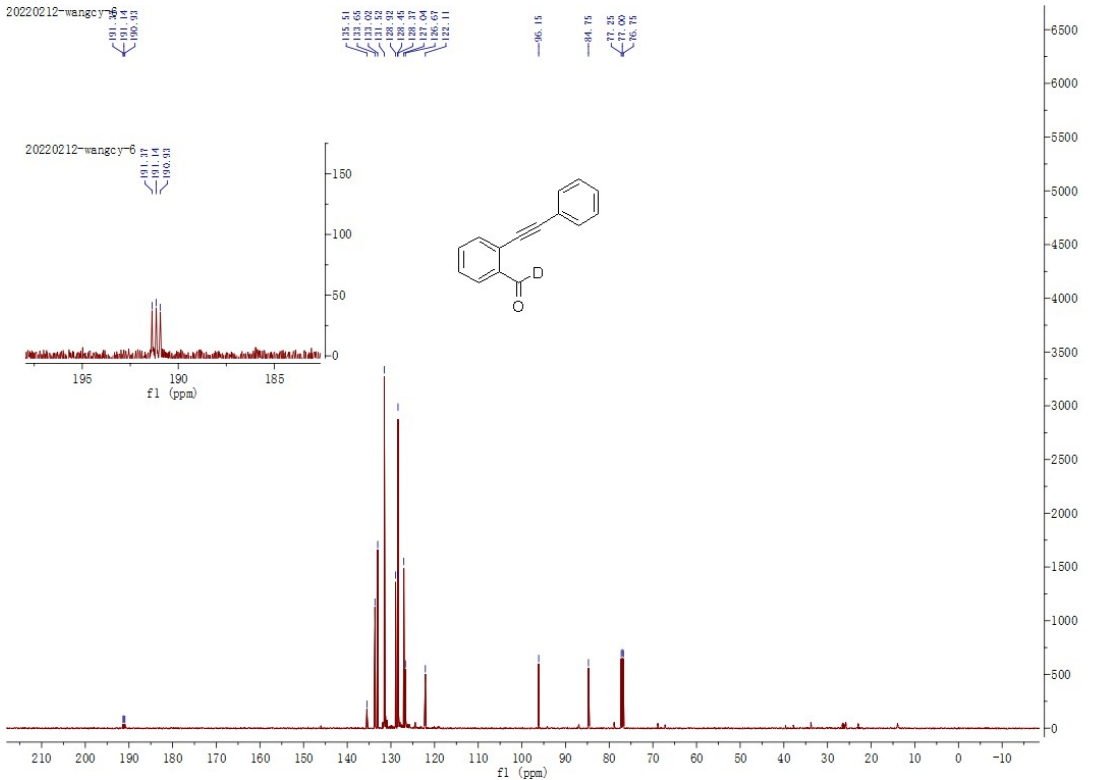

<sup>13</sup>C NMR (125 MHz, CDCl<sub>3</sub>)

20220217-Wangcy-8

### 2a-D<sub>5</sub> (>98%D)

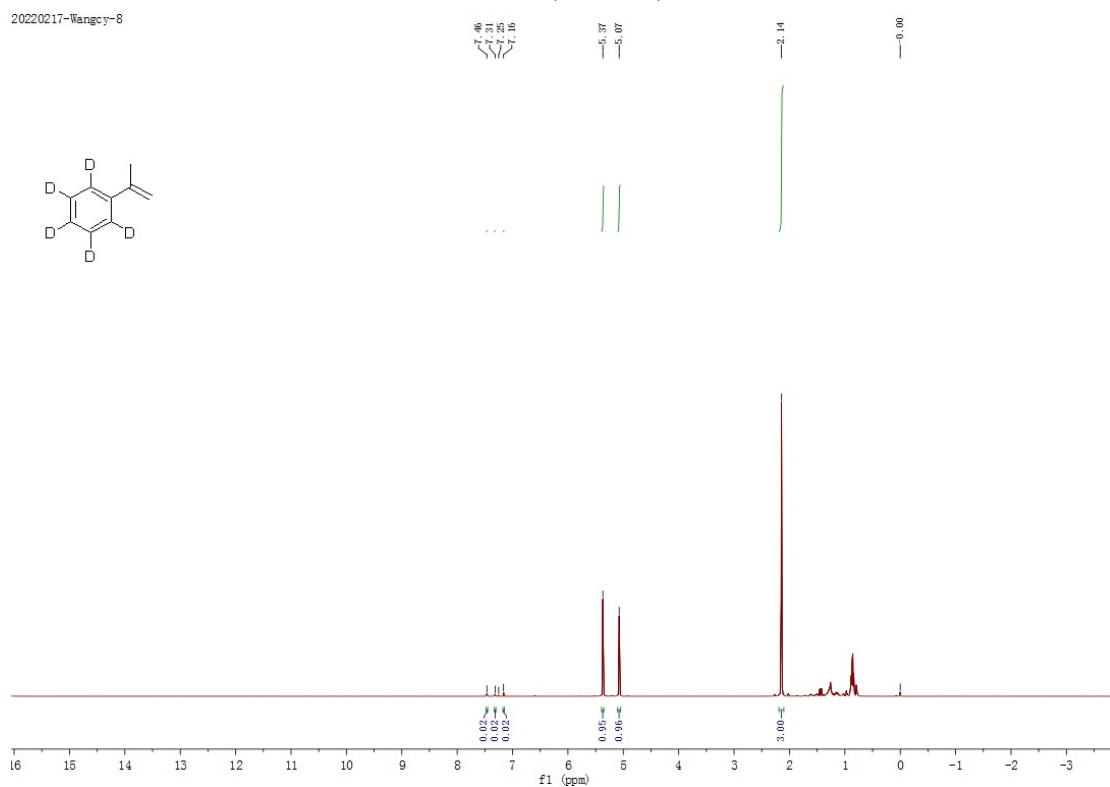

<sup>1</sup>H NMR (500 MHz, CDCl<sub>3</sub>)

20220217-Wangcy-8

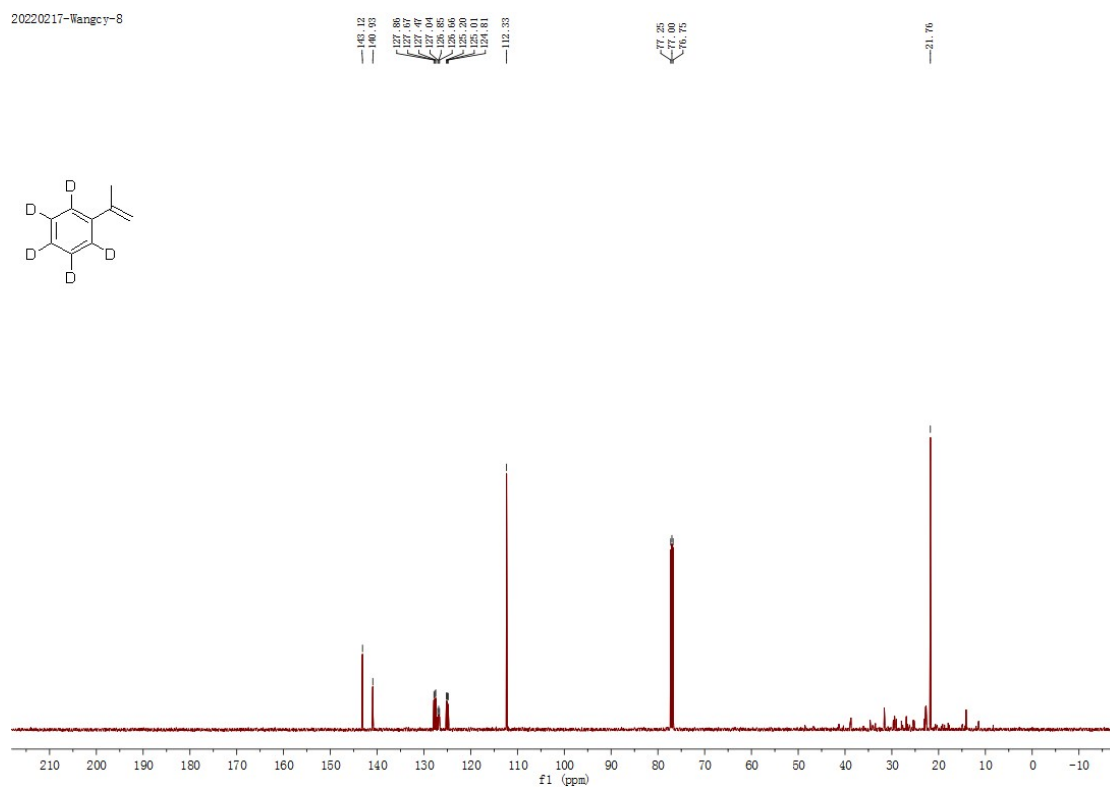

<sup>13</sup>C NMR (125 MHz, CDCl<sub>3</sub>)

# 1a and 1a-D<sub>1</sub>

20220217-Wangcy-9

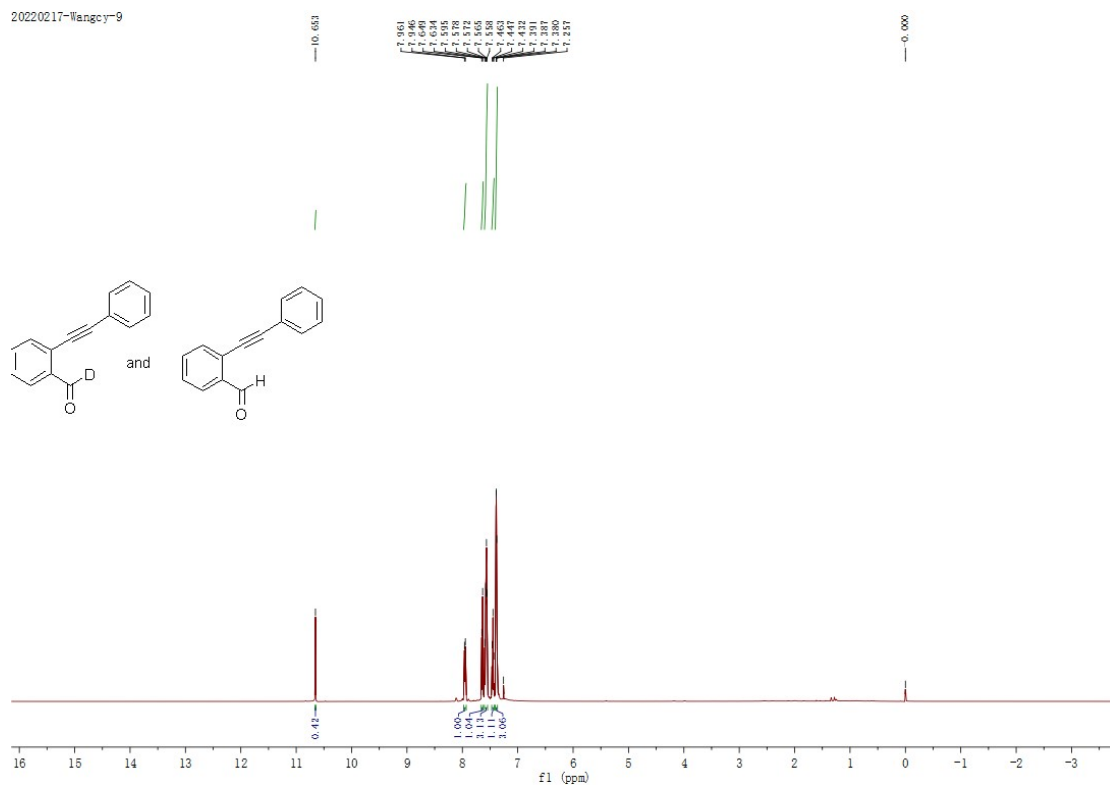

<sup>1</sup>H NMR (500 MHz, CDCl<sub>3</sub>)

20220217-Wangcy-9

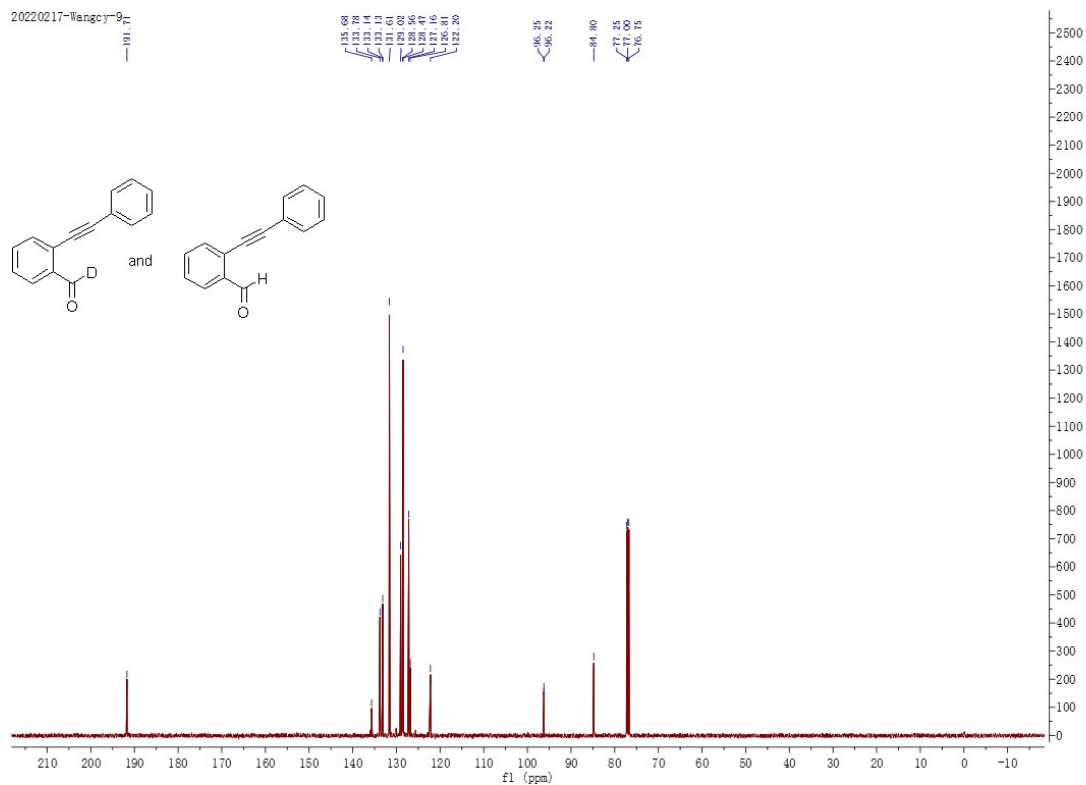

<sup>13</sup>C NMR (125 MHz, CDCl<sub>3</sub>)

### 3aa and 3aa-D<sub>4</sub> (3h)

20220217-Wangcy-11

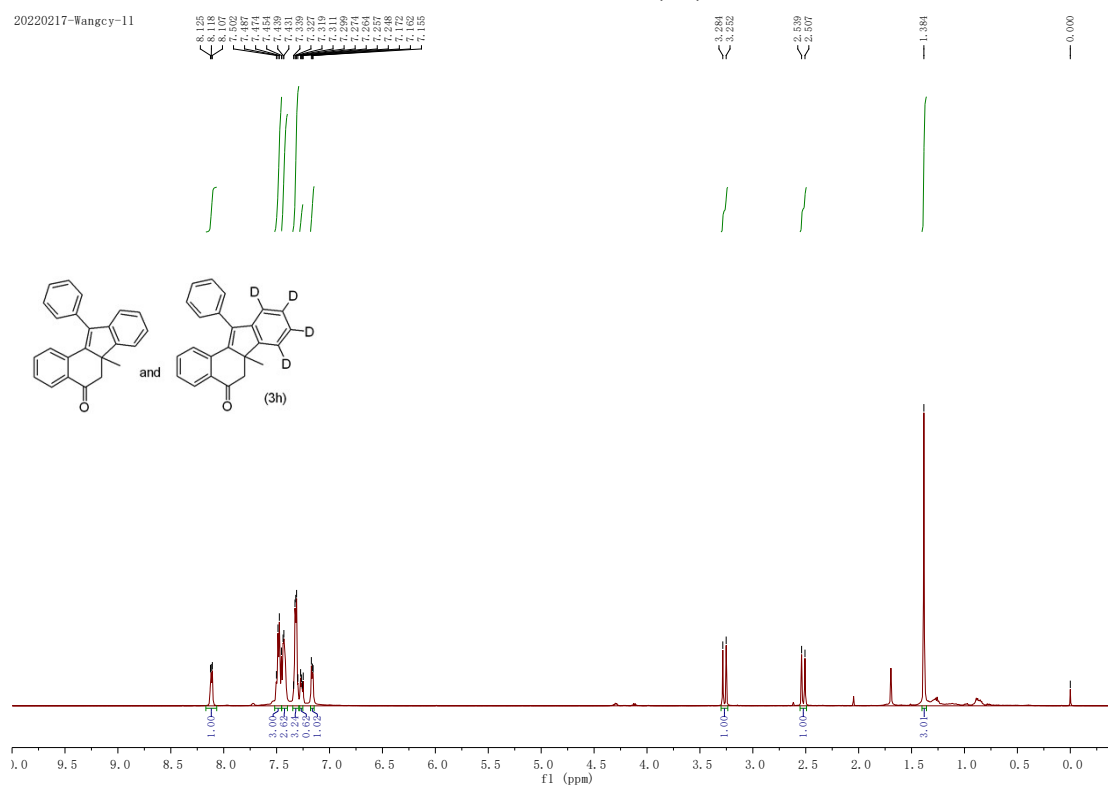

<sup>1</sup>H NMR (500 MHz, CDCl<sub>3</sub>)

20220217-Wangcy-11

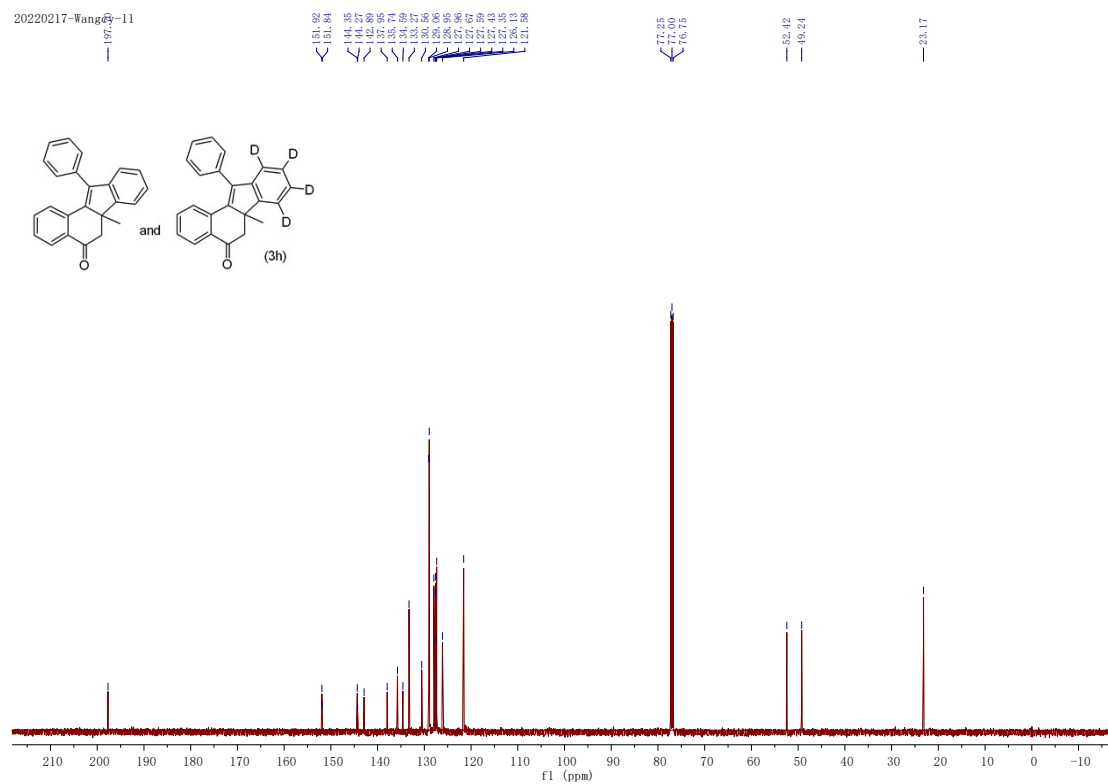

<sup>13</sup>C NMR (125 MHz, CDCl<sub>3</sub>)

### 3aa and 3aa-D<sub>4</sub> (24h)

20220217-Wangcy-10

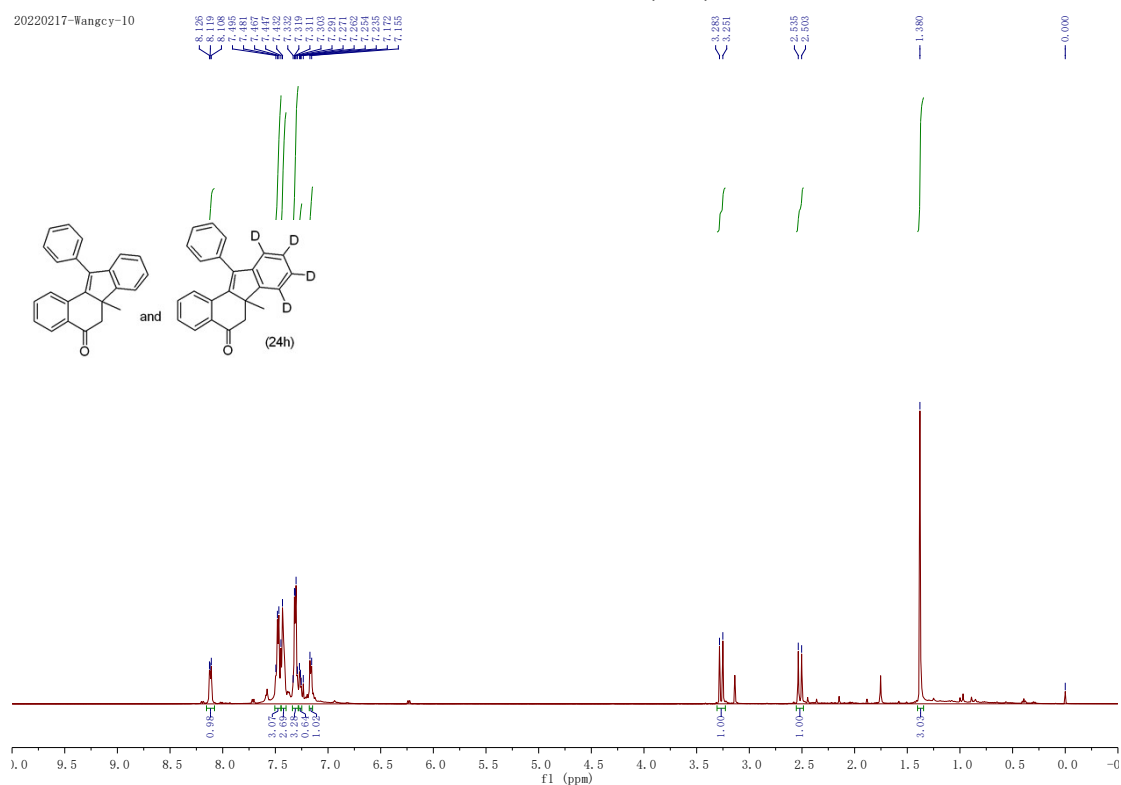

<sup>1</sup>H NMR (500 MHz, CDCl<sub>3</sub>)

20220217-Wangcy-10

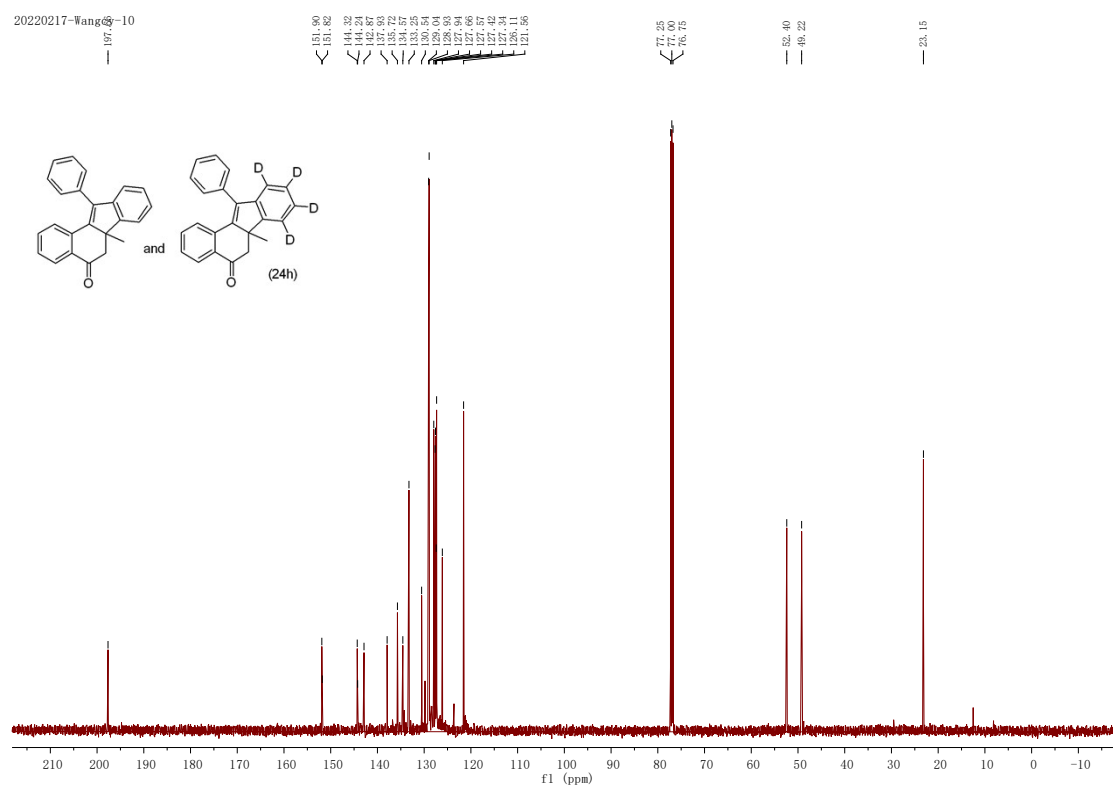

<sup>13</sup>C NMR (125 MHz, CDCl<sub>3</sub>)

**(D) The X-ray single-crystal diffraction analysis of 3aa (CCDC: 2122614)**

The compound **3aa** was dissolved in a mixed solvent of dichloromethane and hexane (v/v 1:3), and stirred until the compound disappeared completely. Then, the solution was filtered. Colorless crystals were obtained by slow evaporation of the filtrate at room temperature after a few days.

Crystal data of the compound **3aa** was collected at 296 K using the radiation wavelength at 0.71073 Å with a Bruker APEX-II CCD detector at Hengyang normal university (China). A multiscan method was applied for absorption corrections. The structures were solved with direct method and were refined with SHELXL-97 (Sheldrick, 2008)

**Molecular structure of the compound with 50% probability ellipsoids**

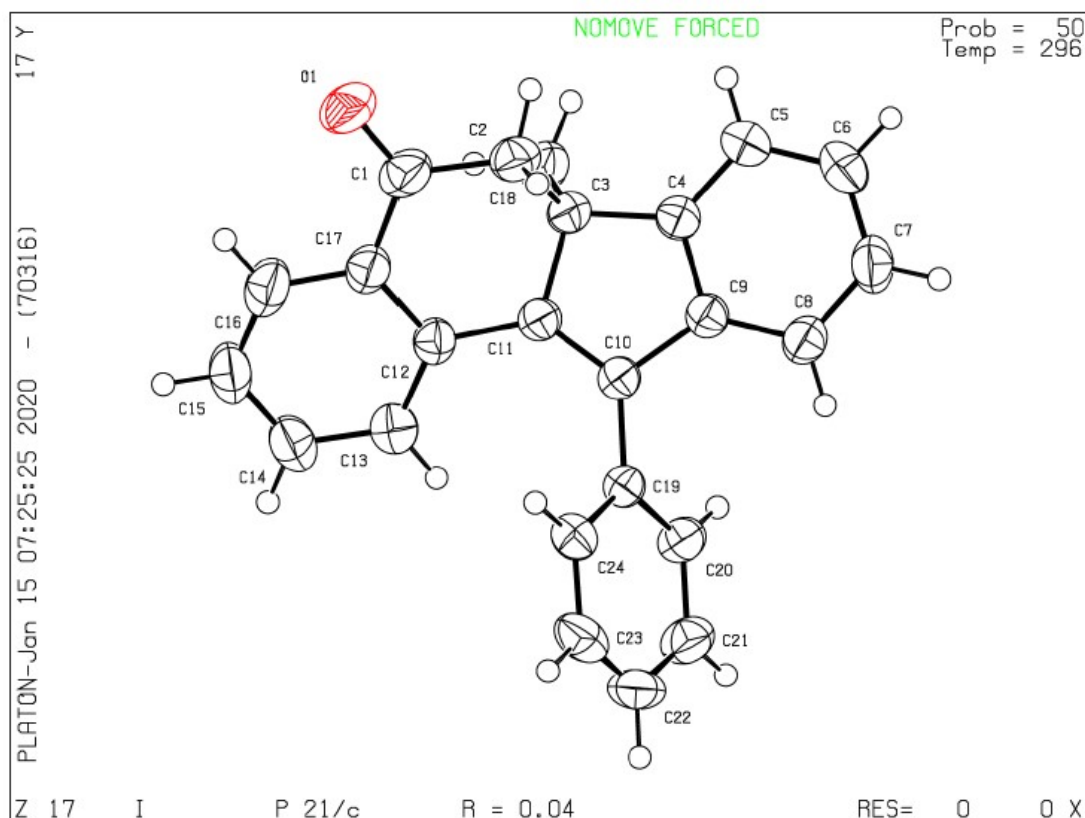



Table S1. Crystal data and structure refinement for wcy001\_0m.

|                                   |                                             |                  |
|-----------------------------------|---------------------------------------------|------------------|
| Identification code               | wcy001_0m                                   |                  |
| Empirical formula                 | C <sub>24</sub> H <sub>18</sub> O           |                  |
| Formula weight                    | 322.38                                      |                  |
| Temperature                       | 296(2) K                                    |                  |
| Wavelength                        | 0.71073 Å                                   |                  |
| Crystal system                    | Monoclinic                                  |                  |
| Space group                       | P2 <sub>1</sub> /c                          |                  |
| Unit cell dimensions              | a = 9.188(12) Å                             | α = 90°.         |
|                                   | b = 19.18(2) Å                              | β = 90.733(16)°. |
|                                   | c = 9.426(12) Å                             | γ = 90°.         |
| Volume                            | 1661(4) Å <sup>3</sup>                      |                  |
| Z                                 | 4                                           |                  |
| Density (calculated)              | 1.289 Mg/m <sup>3</sup>                     |                  |
| Absorption coefficient            | 0.077 mm <sup>-1</sup>                      |                  |
| F(000)                            | 680                                         |                  |
| Crystal size                      | 0.230 x 0.220 x 0.210 mm <sup>3</sup>       |                  |
| Theta range for data collection   | 2.217 to 26.001°.                           |                  |
| Index ranges                      | -11 ≤ h ≤ 11, -23 ≤ k ≤ 23, -11 ≤ l ≤ 11    |                  |
| Reflections collected             | 17892                                       |                  |
| Independent reflections           | 3204 [R(int) = 0.0245]                      |                  |
| Completeness to theta = 25.242°   | 99.9 %                                      |                  |
| Absorption correction             | Semi-empirical from equivalents             |                  |
| Refinement method                 | Full-matrix least-squares on F <sup>2</sup> |                  |
| Data / restraints / parameters    | 3204 / 0 / 226                              |                  |
| Goodness-of-fit on F <sup>2</sup> | 1.049                                       |                  |
| Final R indices [I > 2σ(I)]       | R1 = 0.0405, wR2 = 0.1027                   |                  |
| R indices (all data)              | R1 = 0.0497, wR2 = 0.1100                   |                  |
| Extinction coefficient            | n/a                                         |                  |
| Largest diff. peak and hole       | 0.163 and -0.199 e.Å <sup>-3</sup>          |                  |

Table S2. Atomic coordinates ( $\times 10^4$ ) and equivalent isotropic displacement parameters ( $\text{\AA}^2 \times 10^3$ )

for wey001\_0m.  $U(\text{eq})$  is defined as one third of the trace of the orthogonalized  $U^{ij}$  tensor.

|       | x        | y       | z       | $U(\text{eq})$ |
|-------|----------|---------|---------|----------------|
| O(1)  | -2899(2) | 4076(1) | 4524(2) | 74(1)          |
| C(1)  | -1960(2) | 3758(1) | 3904(2) | 50(1)          |
| C(2)  | -514(2)  | 4086(1) | 3610(2) | 49(1)          |
| C(3)  | 75(2)    | 3844(1) | 2191(2) | 39(1)          |
| C(4)  | 1630(2)  | 4041(1) | 1937(2) | 39(1)          |
| C(5)  | 2260(2)  | 4688(1) | 1868(2) | 49(1)          |
| C(6)  | 3727(2)  | 4733(1) | 1602(2) | 57(1)          |
| C(7)  | 4544(2)  | 4142(1) | 1409(2) | 56(1)          |
| C(8)  | 3918(2)  | 3486(1) | 1473(2) | 45(1)          |
| C(9)  | 2445(2)  | 3440(1) | 1733(1) | 36(1)          |
| C(10) | 1497(2)  | 2831(1) | 1914(1) | 35(1)          |
| C(11) | 145(2)   | 3057(1) | 2208(1) | 36(1)          |
| C(12) | -1183(2) | 2686(1) | 2594(2) | 39(1)          |
| C(13) | -1501(2) | 2011(1) | 2151(2) | 48(1)          |
| C(14) | -2794(2) | 1696(1) | 2511(2) | 56(1)          |
| C(15) | -3782(2) | 2036(1) | 3337(2) | 59(1)          |
| C(16) | -3493(2) | 2695(1) | 3789(2) | 57(1)          |
| C(17) | -2210(2) | 3033(1) | 3416(2) | 45(1)          |
| C(18) | -900(2)  | 4105(1) | 980(2)  | 52(1)          |
| C(19) | 2053(1)  | 2109(1) | 1842(1) | 36(1)          |
| C(20) | 2769(2)  | 1873(1) | 651(2)  | 44(1)          |
| C(21) | 3296(2)  | 1206(1) | 578(2)  | 54(1)          |
| C(22) | 3136(2)  | 762(1)  | 1710(2) | 58(1)          |
| C(23) | 2464(2)  | 989(1)  | 2901(2) | 54(1)          |
| C(24) | 1912(2)  | 1657(1) | 2970(2) | 43(1)          |

Table S3. Bond lengths [ $\text{\AA}$ ] and angles [ $^\circ$ ] for wcy001\_0m.

---

|              |          |
|--------------|----------|
| O(1)-C(1)    | 1.213(2) |
| C(1)-C(17)   | 1.482(3) |
| C(1)-C(2)    | 1.499(3) |
| C(2)-C(3)    | 1.522(3) |
| C(2)-H(2A)   | 0.9700   |
| C(2)-H(2B)   | 0.9700   |
| C(3)-C(4)    | 1.500(3) |
| C(3)-C(11)   | 1.510(3) |
| C(3)-C(18)   | 1.527(2) |
| C(4)-C(5)    | 1.371(3) |
| C(4)-C(9)    | 1.389(2) |
| C(5)-C(6)    | 1.377(3) |
| C(5)-H(5)    | 0.9300   |
| C(6)-C(7)    | 1.374(3) |
| C(6)-H(6)    | 0.9300   |
| C(7)-C(8)    | 1.385(3) |
| C(7)-H(7)    | 0.9300   |
| C(8)-C(9)    | 1.382(3) |
| C(8)-H(8)    | 0.9300   |
| C(9)-C(10)   | 1.468(2) |
| C(10)-C(11)  | 1.348(2) |
| C(10)-C(19)  | 1.477(2) |
| C(11)-C(12)  | 1.463(2) |
| C(12)-C(13)  | 1.391(3) |
| C(12)-C(17)  | 1.397(2) |
| C(13)-C(14)  | 1.379(3) |
| C(13)-H(13)  | 0.9300   |
| C(14)-C(15)  | 1.369(3) |
| C(14)-H(14)  | 0.9300   |
| C(15)-C(16)  | 1.359(3) |
| C(15)-H(15)  | 0.9300   |
| C(16)-C(17)  | 1.394(3) |
| C(16)-H(16)  | 0.9300   |
| C(18)-H(18A) | 0.9600   |
| C(18)-H(18B) | 0.9600   |
| C(18)-H(18C) | 0.9600   |

|             |          |
|-------------|----------|
| C(19)-C(24) | 1.379(2) |
| C(19)-C(20) | 1.385(2) |
| C(20)-C(21) | 1.370(3) |
| C(20)-H(20) | 0.9300   |
| C(21)-C(22) | 1.375(3) |
| C(21)-H(21) | 0.9300   |
| C(22)-C(23) | 1.359(3) |
| C(22)-H(22) | 0.9300   |
| C(23)-C(24) | 1.381(3) |
| C(23)-H(23) | 0.9300   |
| C(24)-H(24) | 0.9300   |

|                  |            |
|------------------|------------|
| O(1)-C(1)-C(17)  | 120.91(16) |
| O(1)-C(1)-C(2)   | 121.01(18) |
| C(17)-C(1)-C(2)  | 118.08(13) |
| C(1)-C(2)-C(3)   | 111.07(14) |
| C(1)-C(2)-H(2A)  | 109.4      |
| C(3)-C(2)-H(2A)  | 109.4      |
| C(1)-C(2)-H(2B)  | 109.4      |
| C(3)-C(2)-H(2B)  | 109.4      |
| H(2A)-C(2)-H(2B) | 108.0      |
| C(4)-C(3)-C(11)  | 102.33(11) |
| C(4)-C(3)-C(2)   | 114.41(13) |
| C(11)-C(3)-C(2)  | 108.18(12) |
| C(4)-C(3)-C(18)  | 110.36(14) |
| C(11)-C(3)-C(18) | 111.13(13) |
| C(2)-C(3)-C(18)  | 110.18(15) |
| C(5)-C(4)-C(9)   | 121.04(16) |
| C(5)-C(4)-C(3)   | 129.78(13) |
| C(9)-C(4)-C(3)   | 109.17(14) |
| C(4)-C(5)-C(6)   | 118.76(15) |
| C(4)-C(5)-H(5)   | 120.6      |
| C(6)-C(5)-H(5)   | 120.6      |
| C(7)-C(6)-C(5)   | 120.60(16) |
| C(7)-C(6)-H(6)   | 119.7      |
| C(5)-C(6)-H(6)   | 119.7      |
| C(6)-C(7)-C(8)   | 121.14(17) |
| C(6)-C(7)-H(7)   | 119.4      |

|                     |            |
|---------------------|------------|
| C(8)-C(7)-H(7)      | 119.4      |
| C(9)-C(8)-C(7)      | 118.25(15) |
| C(9)-C(8)-H(8)      | 120.9      |
| C(7)-C(8)-H(8)      | 120.9      |
| C(8)-C(9)-C(4)      | 120.21(14) |
| C(8)-C(9)-C(10)     | 130.89(14) |
| C(4)-C(9)-C(10)     | 108.84(15) |
| C(11)-C(10)-C(9)    | 108.47(14) |
| C(11)-C(10)-C(19)   | 129.14(13) |
| C(9)-C(10)-C(19)    | 122.32(14) |
| C(10)-C(11)-C(12)   | 131.93(15) |
| C(10)-C(11)-C(3)    | 111.04(12) |
| C(12)-C(11)-C(3)    | 116.95(13) |
| C(13)-C(12)-C(17)   | 118.00(15) |
| C(13)-C(12)-C(11)   | 123.46(14) |
| C(17)-C(12)-C(11)   | 118.51(15) |
| C(14)-C(13)-C(12)   | 120.84(16) |
| C(14)-C(13)-H(13)   | 119.6      |
| C(12)-C(13)-H(13)   | 119.6      |
| C(15)-C(14)-C(13)   | 120.64(18) |
| C(15)-C(14)-H(14)   | 119.7      |
| C(13)-C(14)-H(14)   | 119.7      |
| C(16)-C(15)-C(14)   | 119.63(16) |
| C(16)-C(15)-H(15)   | 120.2      |
| C(14)-C(15)-H(15)   | 120.2      |
| C(15)-C(16)-C(17)   | 121.01(17) |
| C(15)-C(16)-H(16)   | 119.5      |
| C(17)-C(16)-H(16)   | 119.5      |
| C(16)-C(17)-C(12)   | 119.86(17) |
| C(16)-C(17)-C(1)    | 119.05(15) |
| C(12)-C(17)-C(1)    | 121.09(14) |
| C(3)-C(18)-H(18A)   | 109.5      |
| C(3)-C(18)-H(18B)   | 109.5      |
| H(18A)-C(18)-H(18B) | 109.5      |
| C(3)-C(18)-H(18C)   | 109.5      |
| H(18A)-C(18)-H(18C) | 109.5      |
| H(18B)-C(18)-H(18C) | 109.5      |
| C(24)-C(19)-C(20)   | 118.00(15) |

|                   |            |
|-------------------|------------|
| C(24)-C(19)-C(10) | 121.20(14) |
| C(20)-C(19)-C(10) | 120.77(13) |
| C(21)-C(20)-C(19) | 121.18(15) |
| C(21)-C(20)-H(20) | 119.4      |
| C(19)-C(20)-H(20) | 119.4      |
| C(20)-C(21)-C(22) | 119.94(17) |
| C(20)-C(21)-H(21) | 120.0      |
| C(22)-C(21)-H(21) | 120.0      |
| C(23)-C(22)-C(21) | 119.74(17) |
| C(23)-C(22)-H(22) | 120.1      |
| C(21)-C(22)-H(22) | 120.1      |
| C(22)-C(23)-C(24) | 120.50(16) |
| C(22)-C(23)-H(23) | 119.7      |
| C(24)-C(23)-H(23) | 119.7      |
| C(19)-C(24)-C(23) | 120.61(16) |
| C(19)-C(24)-H(24) | 119.7      |
| C(23)-C(24)-H(24) | 119.7      |

---

Symmetry transformations used to generate equivalent atoms:

Table S4. Anisotropic displacement parameters ( $\text{\AA}^2 \times 10^3$ ) for wcy001\_0m. The anisotropic displacement factor exponent takes the form:  $-2\pi^2 [ h^2 a^{*2} U^{11} + \dots + 2 h k a^* b^* U^{12} ]$

|       | U <sup>11</sup> | U <sup>22</sup> | U <sup>33</sup> | U <sup>23</sup> | U <sup>13</sup> | U <sup>12</sup> |
|-------|-----------------|-----------------|-----------------|-----------------|-----------------|-----------------|
| O(1)  | 73(1)           | 60(1)           | 91(1)           | 5(1)            | 41(1)           | 18(1)           |
| C(1)  | 50(1)           | 52(1)           | 49(1)           | 7(1)            | 13(1)           | 12(1)           |
| C(2)  | 53(1)           | 42(1)           | 52(1)           | -3(1)           | 9(1)            | 6(1)            |
| C(3)  | 38(1)           | 36(1)           | 44(1)           | 3(1)            | 5(1)            | 5(1)            |
| C(4)  | 39(1)           | 37(1)           | 41(1)           | 3(1)            | 1(1)            | 1(1)            |
| C(5)  | 51(1)           | 37(1)           | 59(1)           | 2(1)            | 2(1)            | -2(1)           |
| C(6)  | 54(1)           | 44(1)           | 73(1)           | 2(1)            | 2(1)            | -14(1)          |
| C(7)  | 38(1)           | 62(1)           | 67(1)           | 4(1)            | 4(1)            | -10(1)          |
| C(8)  | 38(1)           | 48(1)           | 50(1)           | 3(1)            | 4(1)            | 4(1)            |
| C(9)  | 37(1)           | 38(1)           | 34(1)           | 3(1)            | 1(1)            | 1(1)            |
| C(10) | 36(1)           | 36(1)           | 32(1)           | 2(1)            | 1(1)            | 2(1)            |
| C(11) | 37(1)           | 36(1)           | 35(1)           | 2(1)            | 2(1)            | 2(1)            |
| C(12) | 35(1)           | 43(1)           | 39(1)           | 6(1)            | 1(1)            | 0(1)            |
| C(13) | 42(1)           | 47(1)           | 54(1)           | -1(1)           | 2(1)            | -4(1)           |
| C(14) | 50(1)           | 53(1)           | 64(1)           | 6(1)            | -2(1)           | -13(1)          |
| C(15) | 43(1)           | 67(1)           | 68(1)           | 13(1)           | 8(1)            | -12(1)          |
| C(16) | 41(1)           | 71(1)           | 59(1)           | 11(1)           | 14(1)           | 4(1)            |
| C(17) | 39(1)           | 49(1)           | 48(1)           | 9(1)            | 6(1)            | 4(1)            |
| C(18) | 45(1)           | 53(1)           | 57(1)           | 13(1)           | 2(1)            | 10(1)           |
| C(19) | 33(1)           | 35(1)           | 41(1)           | 1(1)            | -1(1)           | 1(1)            |
| C(20) | 45(1)           | 44(1)           | 43(1)           | 3(1)            | 5(1)            | 8(1)            |
| C(21) | 51(1)           | 50(1)           | 61(1)           | -12(1)          | 5(1)            | 9(1)            |
| C(22) | 55(1)           | 32(1)           | 85(1)           | -4(1)           | -11(1)          | 7(1)            |
| C(23) | 62(1)           | 38(1)           | 62(1)           | 12(1)           | -7(1)           | -7(1)           |
| C(24) | 46(1)           | 40(1)           | 44(1)           | 3(1)            | 2(1)            | -4(1)           |

Table S5. Hydrogen coordinates ( $\times 10^4$ ) and isotropic displacement parameters ( $\text{\AA}^2 \times 10^{-3}$ ) for wey001\_0m.

|        | x     | y    | z    | U(eq) |
|--------|-------|------|------|-------|
| H(2A)  | 171   | 3964 | 4361 | 59    |
| H(2B)  | -617  | 4589 | 3601 | 59    |
| H(5)   | 1707  | 5088 | 2000 | 59    |
| H(6)   | 4169  | 5169 | 1552 | 69    |
| H(7)   | 5533  | 4182 | 1232 | 67    |
| H(8)   | 4475  | 3086 | 1345 | 54    |
| H(13)  | -833  | 1769 | 1605 | 57    |
| H(14)  | -2997 | 1247 | 2190 | 67    |
| H(15)  | -4645 | 1818 | 3587 | 71    |
| H(16)  | -4161 | 2925 | 4356 | 68    |
| H(18A) | -1890 | 3975 | 1156 | 77    |
| H(18B) | -830  | 4603 | 918  | 77    |
| H(18C) | -592  | 3901 | 103  | 77    |
| H(20)  | 2893  | 2172 | -114 | 53    |
| H(21)  | 3761  | 1054 | -235 | 65    |
| H(22)  | 3486  | 308  | 1661 | 69    |
| H(23)  | 2376  | 692  | 3674 | 65    |
| H(24)  | 1441  | 1804 | 3784 | 52    |



Table S6. Torsion angles [°] for wcy001\_0m.

---

|                         |             |
|-------------------------|-------------|
| O(1)-C(1)-C(2)-C(3)     | -145.02(16) |
| C(17)-C(1)-C(2)-C(3)    | 35.1(2)     |
| C(1)-C(2)-C(3)-C(4)     | -169.32(13) |
| C(1)-C(2)-C(3)-C(11)    | -56.01(17)  |
| C(1)-C(2)-C(3)-C(18)    | 65.65(19)   |
| C(11)-C(3)-C(4)-C(5)    | -177.22(15) |
| C(2)-C(3)-C(4)-C(5)     | -60.5(2)    |
| C(18)-C(3)-C(4)-C(5)    | 64.4(2)     |
| C(11)-C(3)-C(4)-C(9)    | 3.84(15)    |
| C(2)-C(3)-C(4)-C(9)     | 120.57(14)  |
| C(18)-C(3)-C(4)-C(9)    | -114.50(15) |
| C(9)-C(4)-C(5)-C(6)     | -0.4(2)     |
| C(3)-C(4)-C(5)-C(6)     | -179.23(15) |
| C(4)-C(5)-C(6)-C(7)     | 0.0(3)      |
| C(5)-C(6)-C(7)-C(8)     | 0.1(3)      |
| C(6)-C(7)-C(8)-C(9)     | 0.2(3)      |
| C(7)-C(8)-C(9)-C(4)     | -0.6(2)     |
| C(7)-C(8)-C(9)-C(10)    | -177.37(15) |
| C(5)-C(4)-C(9)-C(8)     | 0.7(2)      |
| C(3)-C(4)-C(9)-C(8)     | 179.79(13)  |
| C(5)-C(4)-C(9)-C(10)    | 178.14(13)  |
| C(3)-C(4)-C(9)-C(10)    | -2.81(16)   |
| C(8)-C(9)-C(10)-C(11)   | 177.45(14)  |
| C(4)-C(9)-C(10)-C(11)   | 0.42(16)    |
| C(8)-C(9)-C(10)-C(19)   | 0.4(2)      |
| C(4)-C(9)-C(10)-C(19)   | -176.62(12) |
| C(9)-C(10)-C(11)-C(12)  | -174.35(14) |
| C(19)-C(10)-C(11)-C(12) | 2.4(3)      |
| C(9)-C(10)-C(11)-C(3)   | 2.15(16)    |
| C(19)-C(10)-C(11)-C(3)  | 178.93(13)  |
| C(4)-C(3)-C(11)-C(10)   | -3.66(15)   |
| C(2)-C(3)-C(11)-C(10)   | -124.79(13) |
| C(18)-C(3)-C(11)-C(10)  | 114.13(15)  |
| C(4)-C(3)-C(11)-C(12)   | 173.42(12)  |
| C(2)-C(3)-C(11)-C(12)   | 52.29(17)   |
| C(18)-C(3)-C(11)-C(12)  | -68.79(18)  |

|                         |             |
|-------------------------|-------------|
| C(10)-C(11)-C(12)-C(13) | -29.6(2)    |
| C(3)-C(11)-C(12)-C(13)  | 154.06(14)  |
| C(10)-C(11)-C(12)-C(17) | 152.32(16)  |
| C(3)-C(11)-C(12)-C(17)  | -24.01(19)  |
| C(17)-C(12)-C(13)-C(14) | 0.2(2)      |
| C(11)-C(12)-C(13)-C(14) | -177.87(14) |
| C(12)-C(13)-C(14)-C(15) | -1.3(3)     |
| C(13)-C(14)-C(15)-C(16) | 0.9(3)      |
| C(14)-C(15)-C(16)-C(17) | 0.5(3)      |
| C(15)-C(16)-C(17)-C(12) | -1.6(3)     |
| C(15)-C(16)-C(17)-C(1)  | 178.44(16)  |
| C(13)-C(12)-C(17)-C(16) | 1.2(2)      |
| C(11)-C(12)-C(17)-C(16) | 179.37(14)  |
| C(13)-C(12)-C(17)-C(1)  | -178.83(14) |
| C(11)-C(12)-C(17)-C(1)  | -0.7(2)     |
| O(1)-C(1)-C(17)-C(16)   | -5.7(2)     |
| C(2)-C(1)-C(17)-C(16)   | 174.20(15)  |
| O(1)-C(1)-C(17)-C(12)   | 174.33(16)  |
| C(2)-C(1)-C(17)-C(12)   | -5.8(2)     |
| C(11)-C(10)-C(19)-C(24) | -55.2(2)    |
| C(9)-C(10)-C(19)-C(24)  | 121.20(15)  |
| C(11)-C(10)-C(19)-C(20) | 126.60(16)  |
| C(9)-C(10)-C(19)-C(20)  | -57.01(19)  |
| C(24)-C(19)-C(20)-C(21) | 1.3(2)      |
| C(10)-C(19)-C(20)-C(21) | 179.58(14)  |
| C(19)-C(20)-C(21)-C(22) | -0.9(3)     |
| C(20)-C(21)-C(22)-C(23) | -0.5(3)     |
| C(21)-C(22)-C(23)-C(24) | 1.5(3)      |
| C(20)-C(19)-C(24)-C(23) | -0.3(2)     |
| C(10)-C(19)-C(24)-C(23) | -178.59(14) |
| C(22)-C(23)-C(24)-C(19) | -1.1(2)     |

---

Symmetry transformations used to generate equivalent atoms:

## (E) References

1. (a) Asao, N.; Kasahara, T.; Yamamoto, Y. *Angew. Chem. Int. Ed.* 2003, **42**, 3504-3506; (b) Yue, D.; Cá, N. D.; Larock, R. C. *J. Org. Chem.* 2006, **71**, 3381-3388; (c) Chen, Z.; Wu, J. *Org. Lett.* 2010, **12**, 4856-4859. (d) Fang, W.; Wei, Y.; Shi, M. *Chem. Commun.* 2017, **53**, 11666-11669.
2. (a) Zhang, M.-M.; Liu, F.; *Org. Chem. Front.* 2018, **5**, 3443-3446; (b) Xu, S.; Gao, Y.; Chen, R.; Wang, K.; Zhang, Y.; Wang, J. *Chem. Commun.* 2016, **52**, 4478-4480. (c) Wei, W.-X.; Li, Y.; Wen, Y.-T.; Li, M.; Li, X.-S.; Wang, C.-T.; Liu, H.-C.; Xia, Y.; Zhang, B.-S.; Jiao, R.-Q.; Liang, Y.-M. *J. Am. Chem. Soc.* 2021, **143**, 7868-7875.
3. Huang, M.-H.; Hong, Y.; Hu, J.-Q.; Yang, S.-Z.; Zhu, Y.-L.; Wang, D.-C.; Jiang, B. *Tetrahedron Lett.*, 2020, **61**, 151507.
4. Nanko, M.; Inaba, Y.; Sekine, K.; Mikami, K. *Helv. Chim. Acta* 2021, **104**, e2000198
